# Supplementary material for: Arthroscopic meniscectomy versus non-surgical or sham treatment in patients with MRI confirmed degenerative meniscus lesions: a protocol for an individual participant data meta-analysis
Source: PubMed Central journal article supplement — BMJ Open. 2020 Mar 8;10(3):e031864. doi: 10.1136/bmjopen-2019-031864 (PMC7064080; doi:10.1136/bmjopen-2019-031864), 2020-03-08
Supplement: bmjopen-2019-031864.draft_revisions.pdf [file bmjopen-2019-031864.draft_revisions.pdf]

# BMJ Open

BMJ Open is committed to open peer review. As part of this commitment we make the peer review history of every article we publish publicly available.

When an article is published we post the peer reviewers' comments and the authors' responses online. We also post the versions of the paper that were used during peer review. These are the versions that the peer review comments apply to.

The versions of the paper that follow are the versions that were submitted during the peer review process. They are not the versions of record or the final published versions. They should not be cited or distributed as the published version of this manuscript.

BMJ Open is an open access journal and the full, final, typeset and author-corrected version of record of the manuscript is available on our site with no access controls, subscription charges or pay-per-view fees (<http://bmjopen.bmj.com>).

If you have any questions on BMJ Open's open peer review process please email [info.bmjopen@bmj.com](mailto:info.bmjopen@bmj.com)

# BMJ Open

## Arthroscopic meniscectomy versus non-surgical or sham treatment in patients with degenerative meniscus lesions: a protocol for an individual participant data meta-analysis

|                               |                                                                                                                                                                                                                                                                                                                                                                                                                                                                                                                                                                                                                                                                                                                                                                                                                                                                                                                                                                                                                                  |
|-------------------------------|----------------------------------------------------------------------------------------------------------------------------------------------------------------------------------------------------------------------------------------------------------------------------------------------------------------------------------------------------------------------------------------------------------------------------------------------------------------------------------------------------------------------------------------------------------------------------------------------------------------------------------------------------------------------------------------------------------------------------------------------------------------------------------------------------------------------------------------------------------------------------------------------------------------------------------------------------------------------------------------------------------------------------------|
| Journal:                      | <i>BMJ Open</i>                                                                                                                                                                                                                                                                                                                                                                                                                                                                                                                                                                                                                                                                                                                                                                                                                                                                                                                                                                                                                  |
| Manuscript ID                 | bmjopen-2019-031864                                                                                                                                                                                                                                                                                                                                                                                                                                                                                                                                                                                                                                                                                                                                                                                                                                                                                                                                                                                                              |
| Article Type:                 | Protocol                                                                                                                                                                                                                                                                                                                                                                                                                                                                                                                                                                                                                                                                                                                                                                                                                                                                                                                                                                                                                         |
| Date Submitted by the Author: | 27-May-2019                                                                                                                                                                                                                                                                                                                                                                                                                                                                                                                                                                                                                                                                                                                                                                                                                                                                                                                                                                                                                      |
| Complete List of Authors:     | <p>Wijn, Stan; Radboudumc, Department of Operating Rooms Rovers, Maroeska; The Radboud University, Nijmegen Medical Centre, Rongen, Jan; Radboudumc, Operating rooms Østerås, Håvard; Norges Teknisk-Naturvitenskapelige Universitet Fakultet for Medisin og Helsevitenskap, Neuromedicine and Movement Science</p> <p>Risberg, May Arna; Norwegian School of Sport Sciences, Department of Sports Medicine; Oslo universitetssykehus Ulleval, Division of Orthopedic Surgery, Department of Reserach</p> <p>Roos, Ewa; Syddansk Universitet Det Sundhedsvidenskabelige Fakultet, Sports Science and Clinical Biomechanics</p> <p>Hare, Kristoffer; Region Zealand, Department of Orthopedics, Slagelse Medical Hospital</p> <p>van de Graaf, VA; Spaarne Gasthuis, Department of Orthopaedic Surgery, Joint Research</p> <p>Poolman, Rudolf; Onze Lieve Vrouwe Gasthuis, Orthopaedic Surgery</p> <p>Englund, Martin; Lund University, Dept of Orthopedics</p> <p>Hannink, Gerjon; Radboudumc, Department of Operating Rooms</p> |
| Keywords:                     | Arthroscopic surgery, Meniscectomy, Osteoarthritis, Individual Participant Data Meta-Analysis, IPDMA                                                                                                                                                                                                                                                                                                                                                                                                                                                                                                                                                                                                                                                                                                                                                                                                                                                                                                                             |
|                               |                                                                                                                                                                                                                                                                                                                                                                                                                                                                                                                                                                                                                                                                                                                                                                                                                                                                                                                                                                                                                                  |

SCHOLARONE™  
Manuscripts

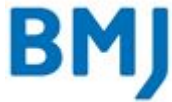

I, the Submitting Author has the right to grant and does grant on behalf of all authors of the Work (as defined in the below author licence), an exclusive licence and/or a non-exclusive licence for contributions from authors who are: i) UK Crown employees; ii) where BMJ has agreed a CC-BY licence shall apply, and/or iii) in accordance with the terms applicable for US Federal Government officers or employees acting as part of their official duties; on a worldwide, perpetual, irrevocable, royalty-free basis to BMJ Publishing Group Ltd ("BMJ") its licensees and where the relevant Journal is co-owned by BMJ to the co-owners of the Journal, to publish the Work in this journal and any other BMJ products and to exploit all rights, as set out in our [licence](#).

The Submitting Author accepts and understands that any supply made under these terms is made by BMJ to the Submitting Author unless you are acting as an employee on behalf of your employer or a postgraduate student of an affiliated institution which is paying any applicable article publishing charge ("APC") for Open Access articles. Where the Submitting Author wishes to make the Work available on an Open Access basis (and intends to pay the relevant APC), the terms of reuse of such Open Access shall be governed by a Creative Commons licence – details of these licences and which [Creative Commons](#) licence will apply to this Work are set out in our licence referred to above.

Other than as permitted in any relevant BMJ Author's Self Archiving Policies, I confirm this Work has not been accepted for publication elsewhere, is not being considered for publication elsewhere and does not duplicate material already published. I confirm all authors consent to publication of this Work and authorise the granting of this licence.

1  
2  
3  
4 1 **Arthroscopic meniscectomy versus non-surgical or sham treatment in patients with degenerative meniscus**  
5  
6 2 **lesions: a protocol for an individual participant data meta-analysis**  
7

8 3 Stan R.W. Wijn<sup>1</sup>, Maroeska M. Rovers<sup>1</sup>, Jan J. Rongen<sup>1</sup>, Håvard Østerås<sup>2</sup>, May A. Risberg<sup>3</sup>, Ewa M. Roos<sup>4</sup>,  
9  
10 4 Kristoffer B. Hare<sup>5</sup>, Victor A. van de Graaf<sup>6</sup>, Rudolf W. Poolman<sup>6</sup>, Martin Englund<sup>7</sup>, Gerjon Hannink<sup>1</sup>  
11  
12 5

13  
14 6 <sup>1</sup> Radboud University Medical Center, Radboud Institute for Health Sciences, Department of Operating Rooms, Nijmegen, the Netherlands

15 7 <sup>2</sup> Norwegian University of Science and Technology, Faculty of Medicine and Health Sciences, Department of Neuromedicine and Movement  
16  
17 8 Science, Trondheim, Norway

18  
19 9 <sup>3</sup> Norwegian School of Sport Sciences, Department of Sport Medicine, and Division of Orthopedic Surgery, Oslo University Hospital, Oslo,  
20  
21 10 Norway

22 11 <sup>4</sup> University of Southern Denmark, Musculoskeletal Function and Physiotherapy and Center for Muscle and Joint Health, Department of  
23  
24 12 Sports and Clinical Biomechanics, Odense, Denmark

25 13 <sup>5</sup> University of Southern Denmark, Institute of Sports Science and Clinical Biomechanics, Department of Orthopedics, Odense, Denmark

26 14 <sup>6</sup> OLVG, Joint Research, Department of Orthopaedic Surgery, Amsterdam, the Netherlands

27 15 <sup>7</sup> Lund University, Faculty of Medicine, Department of Clinical Sciences Lund, Orthopaedics, Clinical Epidemiology Unit, Lund, Sweden  
28  
29  
30  
31

32 17 Stan R.W. Wijn<sup>1</sup>, Stan.Wijn@radboudumc.nl

33 18 Maroeska M. Rovers<sup>1</sup>, Maroeska.Rovers@radboudumc.nl

34 19 Jan J. Rongen<sup>1</sup>, Jan.Rongen@radboudumc.nl

35 20 Håvard Østerås<sup>2</sup>, Havard.Osteras@ntnu.no

36 21 May A. Risberg<sup>3</sup>, M.a.Risberg@nih.no

37 22 Ewa M. Roos<sup>4</sup>, ERoos@health.sdu.dk

38 23 Kristoffer B. Hare<sup>5</sup>, Kbh@regionsjaelland.dk

39 24 Victor A. van de Graaf<sup>6</sup>, vandeGraaf@gmail.com

40 25 Rudolf W. Poolman<sup>6</sup>, RWP@jointresearch.org

41 26 Martin Englund<sup>7</sup>, Martin.Englund@med.lu.se

42 27 Gerjon Hannink<sup>1</sup>, Gerjon.Hannink@radboudumc.nl  
43  
44  
45  
46  
47  
48

49 29 Physical mailing address of the corresponding author:

50  
51 30 Stan R.W. Wijn

52 31 Radboud university medical center

53 32 715 Department of Operating Rooms

54 33 P.O. Box 9101

55 34 6500 HB Nijmegen

56 35 The Netherlands  
57  
58

59 37 Word count: 3223  
60

1  
2  
3 38 **Abstract**

4  
5 39 **Introduction**

6  
7  
8 40 Arthroscopic partial meniscectomy (APM) after degenerative meniscus tears is one of the most frequently  
9  
10 41 performed surgeries in orthopedics. Although several randomized controlled trials (RCTs) have been published  
11  
12 42 that showed no clear benefit compared to sham treatment or non-surgical treatment, the incidence of APM  
13  
14 43 remains high. The common perception by most orthopedic surgeons is that there are subgroups of patients  
15  
16 44 that *do* need APM to improve, and they argue that each study sample of the existing trials is not representative  
17  
18 45 for the day-to-day patients in the clinic. Therefore, the objective of this individual participant data meta-  
19  
20 46 analysis (IPDMA) is to assess whether there are subgroups of patients with degenerative meniscus lesions who  
21  
22 47 benefit from APM in comparison with non-surgical or sham treatment.  
23  
24

25 48 **Methods and Analysis**

26  
27 49 An existing systematic review will be updated to identify all RCTs worldwide that evaluated APM compared to  
28  
29 50 sham- or non-surgical treatment in patients with knee symptoms and degenerative meniscus tears. Time and  
30  
31 51 effort will be spent in contacting principal investigators of the original trials and encourage them to collaborate  
32  
33 52 in this project by sharing their trial data. All individual participant data will be validated for missing data,  
34  
35 53 internal data consistency, randomization integrity and censoring patterns. After validation, all datasets will be  
36  
37 54 combined and analyzed using a one- and two-staged approach. The most important outcome will be the  
38  
39 55 difference between APM and control groups in knee pain, function and quality of life 2 years after the  
40  
41 56 intervention. Other outcomes of interest will include the difference in adverse events and mental health.  
42  
43

44 57 **Ethics and dissemination**

45  
46  
47 58 This IPDMA will provide the evidence base to update and tailor diagnostic and treatment protocols as well as  
48  
49 59 (international) guidelines for patients for whom orthopedic surgeons consider APM. The results will be  
50  
51 60 submitted for publication in a peer-reviewed journal.

52  
53 61 **Registration**

54  
55 62 Prospero registration number: CRD42017067240

56  
57 63 **Keywords**

1  
2  
3 64 Arthroscopic surgery; Meniscectomy; Osteoarthritis; Individual Participant Data Meta-Analysis; IPDMA  
4

5 65 **Article Summary**  
6

7 66 **Strengths and limitations of this study**  
8

- 9 67 • To our knowledge, this is the first study that combines the individual participant data of RCTs  
10 performed on APM, maximizing the capability to detect subgroups that may benefit from the surgery.  
11 68  
12  
13 69 • The main advantage of an IPDMA is that no large-scale RCT is required, but instead the power of  
14 existing studies is combined to achieve large patient numbers.  
15 70  
16  
17 71 • Trial data might not be available, not accessible or sharing is not possible due to a stringent informed  
18 consent that only enables the use of the data for the original study. This might limit the amount of  
19 72 trials we can include.  
20  
21 73  
22  
23 74 • We are dependent on the outcomes that have been used in the included studies. These can differ  
24 between studies.  
25 75  
26  
27  
28  
29 76  
30  
31  
32  
33  
34  
35  
36  
37  
38  
39  
40  
41  
42  
43  
44  
45  
46  
47  
48  
49  
50  
51  
52  
53  
54  
55  
56  
57  
58  
59  
60

## 77 **Background**

78 Arthroscopic partial meniscectomy (APM) is a well-established surgical procedure intended to treat symptoms  
79 believed to be caused by degenerative meniscus lesions. [1–3] Degenerative lesions are typically observed in  
80 middle-aged and older people, and are caused by chronic degenerative processes. [4,5] Over the past decade,  
81 evidence has accumulated that questions both the rationale for, and the effectiveness of APM for degenerative  
82 meniscus lesions. [6,7] Additionally, concerns have been expressed on the harms associated with the  
83 procedure [7–9] and the potential detrimental effect of the procedure on the progression of osteoarthritis.  
84 [10–12] Still, the number of surgical procedures performed in the treatment of degenerative meniscus lesions  
85 remains high. [13–17]

86 Orthopedic surgeons have expressed concerns about the generalizability of the trial results and point  
87 out that the study samples are not representative of the subjects they select for surgery in their day-to-day  
88 clinical practice.[18–24] The common perception by most surgeons is that there are subgroups of patients that  
89 *do* need the procedure to improve.[8] Hence, applying the mean effects of randomized controlled trials (RCTs)  
90 to individual patients in day-to-day practice runs against the intuitive approach of doctors to use the specific  
91 characteristics of a particular patient to tailor management accordingly. Unfortunately, the identification of  
92 subgroups of patients that may/may not benefit from the procedure has been problematic, as the individual  
93 trials performed so far were too small to perform valid and reliable subgroup analyses.

94 An individual participant data meta-analysis (IPDMA), i.e. a meta-analysis on the original individual  
95 participant data of previously performed trials, has been described as the gold standard of systematic review  
96 and meta-analysis. An IPDMA offers the unique opportunity to recode, and re-analyze all original trial data, and  
97 evaluate the effectiveness of surgical treatment of degenerative meniscus lesions and to identify potential  
98 subgroups more likely to benefit from the intervention. Identifying these subgroups can assist physicians to  
99 make personalized treatment decisions and thereby improving the overall quality of life of patients that are  
100 currently selected for APM.

101 Therefore, the objective of this IPDMA is to assess whether there are subgroups of patients with  
102 degenerative meniscus lesions who benefit from APM in comparison with non-surgical or sham treatment.

103

104

## 105 **Methods**

106 The protocol is reported according to the Preferred Reporting Items for Systematic Reviews and Meta-Analysis  
107 protocols (PRISMA-P) statement and is registered in PROSPERO with registration number: CRD42017067240.

108 [25] The first part of the method section describes a regular systematic review to identify eligible papers and  
109 invite the study authors to collaborate and contribute data. The second part describes the analysis with the  
110 individual participant data.

## 111 **Patient and Public Involvement**

112 Patients and members of the public were not involved in development of the protocol. A panel of patient  
113 representatives will provide detailed input regarding outcomes and the interpretation of the results from this  
114 IPDMA.

## 116 **Part 1: Identifying eligible papers & data collection**

### 117 **Eligibility criteria**

118 This IPDMA will include RCTs that evaluated the effectiveness of (partial) meniscectomy compared to non-  
119 surgical or sham treatments in persons with MRI-verified degenerative meniscus lesions. Degenerative  
120 meniscus lesions are typically observed in middle-aged and older people and may be the result of early  
121 degenerative knee disease. Persistent knee symptoms may encompass knee pain, limitation of function, and  
122 mechanical symptoms such as the sensation of catching or locking of the knee. Non-surgical or sham  
123 treatments may include, but are not limited to, sham surgery, pain and/or anti-inflammatory medication,  
124 exercise programs, and/or watchful waiting. Trials that included persons with traumatic meniscal lesions,  
125 defined as being the result of a specific traumatic incident will be excluded. There will be no restrictions on  
126 publication date, type of setting, length of follow up, or language.

### 127 **Identification and selection of eligible trials**

128 The search strategy described by Thorlund et al. [7] will be adopted to systematically search for eligible trials in  
129 Medline, Embase, CINAHL, Web of Science, and the Cochrane Central Register of Controlled Trials (CENTRAL).  
130 (Additional file 1) The identified studies will be exported to EROS (Early Review Organizing Software, developed



1  
2  
3 131 by Institute of Clinical Effectiveness and Health Policy, Buenos Aires, Argentina) to remove duplicates, and  
4  
5 132 randomly allocate references to two independent reviewers responsible for screening and selection. The two  
6  
7 133 reviewers will independently screen all titles and abstracts of identified reports for eligibility. Full-text copies of  
8  
9 134 all publications regarded as potentially eligible for inclusion, or where there is any uncertainty, will  
10  
11 135 subsequently be assessed. Trials will be included when they meet the eligibility criteria. Any discrepancies  
12  
13 136 between reviewers will be resolved by discussion, and if necessary, a third reviewer will be consulted. In  
14  
15 137 addition, the reference lists of included studies will be reviewed to identify additional eligible trials. The  
16  
17 138 electronic database search will be supplemented by searching for additional eligible trials in the World Health  
18  
19 139 Organization International Clinical Trials Registry Platform (WHO ICTRP) search portal, which contains the trial  
20  
21 140 registration datasets provided by several registries. This portal includes 16 national and international primary  
22  
23 141 registries, including ClinicalTrials.gov, ANZCTR, JPRN, and ISRCTN. The corresponding authors of eligible trials  
24  
25 142 will be invited to collaborate in the current IPDMA by sharing their data.

#### 27 28 143 **Collection of individual participant data**

#### 29 30 144 **Data collection and transfer**

31  
32  
33 145 Time and effort will be spent in tracing and encouraging original investigators to share their trial data. If no  
34  
35 146 reply is received on a first invitation, additional inquiries will be sent, including inquiries sent to alternative  
36  
37 147 email addresses identified for the corresponding author, inquiries sent to listed co-authors, and to the  
38  
39 148 institution of the corresponding author listed in the original publication. The principal investigators of the  
40  
41 149 original trials collaborating in the current project will be encouraged to actively participate in the IPDMA and  
42  
43 150 discuss and finalize the definitions and outcomes to be assessed and the analytical processes proposed. Where  
44  
45 151 possible, a face-to-face collaborator meeting will be scheduled, at which key decisions, including the project  
46  
47 152 design, analysis plan, and interpretation of findings will be discussed. Before sharing of the de-identified data,  
48  
49 153 we will sign a data sharing agreement with those principal investigators of the original trials that are interested  
50  
51 154 in collaboration, in which we will arrange that the research data will be used for the declared purposes and the  
52  
53 155 data will be stored on secured servers located in the Netherlands.

#### 54 55 56 156 **Data check and risk of bias**

1  
2  
3 157 All received data will first be validated to match the results of the original publication. Statistical tests will be  
4  
5 158 repeated and analyzed in R (R Foundation for Statistical Computing, Vienna, Austria). The trial data provided by  
6  
7 159 original investigators will be checked for consistency, plausibility, integrity of randomization, and  
8  
9 160 reproducibility of published trial results. The aims of checking data are to increase the probability that data  
10  
11 161 supplied are accurate, and to confirm that trials were appropriately randomized. Inconsistencies will be  
12  
13 162 discussed and resolved with the individual investigators. All checked and de-identified data of randomized  
14  
15 163 participants will be entered into a pooled database, and every trial will be assigned a trial number. Data will  
16  
17 164 include characteristics relating to the participants (age, gender, body mass index (BMI)); radiographic  
18  
19 165 information on knee osteoarthritis; onset, duration, and severity of symptoms; generic and disease-specific  
20  
21 166 health-related quality-of-life); non-surgical or sham procedure; trial (sample size, setting, allocation  
22  
23 167 concealment); and outcome measures of interest. For eligible trials of which original data is not available the  
24  
25 168 aggregated data from trial reports will be collected.

27 169         Checking the IPD directly can provide more reliable investigations of key potential biases, some of  
28  
29 170 which might be reduced or alleviated in the process. The risk of bias in included trials will be independently  
30  
31 171 assessed by checking the IPD directly. Randomization and allocation concealment will be assessed by checking  
32  
33 172 if both treatment arms are balanced in every study.[26] The advantage of an IPDMA is that we can also include  
34  
35 173 outcomes not reported by the original journal article, possibly reducing outcome reporting bias by checking all  
36  
37 174 relevant outcomes at the same time. In order to avoid ecological bias, the within-trial information will be  
38  
39 175 examined for individual predictors of treatment effect, separately from the across-trial information.[27]  
40  
41 176 The potential for publication bias and small study effects will be examined, in the context of visual inspection,  
42  
43 177 using a contour-enhanced funnel plot.[28,29] To avoid availability bias, aggregated data from studies lacking  
44  
45 178 individual participant data will be used to consider their potential impact.

#### 48 179 **Missing data**

50  
51 180 The final IPDMA dataset will have a multilevel (i.e. clustered) structure, where the individual trials are the levels  
52  
53 181 (i.e. clusters). A foreseen feature of this dataset will be that some variables will be systematically missing, that  
54  
55 182 is missing for all individuals in one or more trials. Next to systematically missing variables, we may also  
56  
57 183 encounter sporadically missing variables, that is missing for some but not all individuals in one or more trials.

1  
2  
3 184 In order to optimally use the available participant data, reduce bias, and to increase statistical efficiency,  
4  
5 185 incomplete data will be imputed using imputation methods that handle both systematically and sporadically  
6  
7 186 missing covariates in a two-level structure using hierarchical multiple imputations by chained equations (MICE).  
8  
9 187 [30–33]

## 11 188 **Outcomes variables**

13  
14 189 The most important outcomes according to surgeons and patients is treatment effect, determined as the  
15  
16 190 difference between the intervention (surgery) and control group (non-surgical treatment) in knee pain,  
17  
18 191 function and quality of life 2 years after the intervention. The preferred outcome measure instrument will be  
19  
20 192 the Knee injury and Osteoarthritis Outcome Scale (KOOS). The KOOS is an instrument developed with the  
21  
22 193 purpose of evaluating short-term and long-term symptoms and function in subjects with a knee injury and  
23  
24 194 osteoarthritis. The KOOS consists of 5 subscales: pain, other symptoms, function in daily living, function in sport  
25  
26 195 and recreation, and knee-related quality of life and a composite score can be calculated (referred to as the  
27  
28 196 KOOS5). The KOOS has been validated for several orthopedic interventions such as anterior cruciate ligament  
29  
30 197 reconstruction, meniscectomy and total knee replacement. [34] The score of the KOOS pain subscales will be  
31  
32 198 compared between the intervention and control group across the included studies. Other measurement  
33  
34 199 instrument targeted at quantifying pain will be standardized and combined in one single pain outcome. The  
35  
36 200 functional outcome will be measured by using the KOOS function subscale or equivalent outcome aimed to  
37  
38 201 measure function. The health quality of life will be measured by using the EuroQol-5 dimensions (EQ5D)  
39  
40 202 questionnaire or the 36-Item Short Form Survey (SF-36).

41  
42 203 Other outcomes of interest will include the difference between intervention and control group in adverse  
43  
44 204 events (defined as deep venous thrombosis, pulmonary thromboembolism, venous thromboembolism,  
45  
46 205 infection, and death) associated with the intervention from baseline to 2 years after intervention; difference in  
47  
48 206 mental health; difference in risk for future knee replacement surgery between groups (feasibility will depend  
49  
50 207 on whether the follow up of the trials will be long enough to capture the events), and the effect of follow-up  
51  
52 208 time after the intervention on the treatment effect.

## 55 209 **Part 2: Analysis**

### 58 210 **Treatment effect**

1  
2  
3 211 The IPDMA will be used to assess the general effectiveness of APM in comparison with non-surgical or sham  
4  
5 212 treatments in patients with knee symptoms and degenerative meniscal lesions. For this part, we will apply both  
6  
7 213 a two-stage and one-stage approach.[35] In the two-stage approach, we will perform regression analyses for  
8  
9 214 each study to obtain effect estimates separately. Thereafter these are pooled in a random effects model (to  
10  
11 215 account for heterogeneity) like a regular meta-analysis. The random effects models in the two-stage will be  
12  
13 216 analyzed using the restricted maximum likelihood (REML) approach with the Hartung-Knapp-Sidik-Jonkman  
14  
15 217 method for continuous outcomes to account for uncertainty due to heterogeneity.[36] The two-stage approach  
16  
17 218 is ideal for assessing pooled treatment effect and detect heterogeneity. However, it is difficult to detect non-  
18  
19 219 linear trends or account for correlating covariates.

20  
21 220 In the one-stage approach, the IPD from all studies will be analyzed simultaneously by adopting a  
22  
23 221 single statistical model (random effects model) that fully accounts for heterogeneity across studies whilst  
24  
25 222 accounting for the clustering of participants within studies. The one-stage approach is more flexible and more  
26  
27 223 exact compared to the two-stage but can face computational difficulties. Therefore, the results from the one-  
28  
29 224 stage will be compared to the results of the two-stage and differences will be investigated. The random effects  
30  
31 225 models in the one-stage will be analyzed using the REML approach with the Kenward-Rogers approach for  
32  
33 226 continuous outcome and the maximum likelihood method (ML) with quadrature for binary or survival  
34  
35 227 outcomes.[35,37,38] Heterogeneity will be addressed by  $I^2$  and  $\tau^2$ , reflecting the heterogeneity between  
36  
37 228 studies. To reflect the variation of the treatment effect in a different setting, 95% prediction intervals will be  
38  
39 229 reported to provide more information on the expected effect in future patients.[39]

40  
41 230 A key advantage of a one-stage approach is the flexibility in terms of the models that may be fitted  
42  
43 231 compared to a two-stage approach. One-stage models allow for the inclusion of multiple covariates in a single  
44  
45 232 model, multiple random-effects on different parameters, correlation between covariates and the separation of  
46  
47 233 within and across-trials information. It is this flexibility that is essential to the primary objective of this IPDMA.  
48  
49 234 [40]

### 50 51 52 235 **Heterogeneity in treatment effect (subgroups)**

53  
54  
55 236 To investigate which patients may benefit from (partial) meniscectomy we will assess whether the treatment  
56  
57 237 effect is modified by baseline patient characteristics. First, relevant baseline patient characteristics will be  
58  
59 238 identified. Modern regression procedures with penalization of estimated regression coefficients will be applied  
60

1  
2  
3 239 for the selection of those characteristics that are independent predictors of the treatment effect.[41,42] A full  
4  
5 240 list of the baseline patient characteristics that will be taken into consideration are listed in Additional file 2.  
6  
7 241 Second, it will be assessed whether these identified independent baseline predictors, (individually or in  
8  
9 242 combinations) modify the treatment effect. Effect modification will be assessed with a random effects model.  
10  
11 243 In this model, a dummy for the particular study will be the random effect and APM (yes vs. no), the potential  
12  
13 244 effect modifier, and an interaction term (APM \* potential effect modifier) will be included as fixed variables  
14  
15 245 and the treatment effect as dependent variables.[33] The illustrated approach will allow assessment of effect  
16  
17 246 modification without overfitting the data and reducing the risk of type I errors.

18  
19 247 In addition, we want to ensure that patient characteristics deemed to be of high clinical relevance in day-  
20  
21 248 to-day clinical practice are ultimately evaluated for effect modification. For this purpose, alongside the  
22  
23 249 procedure described above, we will also assess a set of predefined patient characteristics deemed to be of high  
24  
25 250 clinical relevance for effect modification. To define these characteristics the IPDMA collaborators will be asked  
26  
27 251 to provide a top-3 of characteristics that they regard as most clinically relevant. Subsequently, it will be  
28  
29 252 assessed whether the overall top-3 of these predefined patient characteristics modify the treatment effect.  
30  
31 253 Predefining these characteristics will be performed before actual analysis of the data.

#### 32 33 34 254 **Sensitivity analysis**

35  
36 255 To analyze the robustness of the results from the IPDMA, several sensitivity analyses will be performed. First,  
37  
38 256 to evaluate the impact of including aggregated data of published trials (of which the IPD was not available in  
39  
40 257 the meta-analysis), analyses will be performed in which we either only include studies with IPD available or  
41  
42 258 only studies of which only aggregated data was available.

43  
44 259 Second, to determine the effect of imputation of missing values on the study outcome, analyses will be  
45  
46 260 performed in which we impute either only systematic missing variables, only sporadically missing variables  
47  
48 261 (within trials) or not impute at all.

#### 49 50 51 262 **Publication considerations**

52  
53  
54 263 The draft version of the final manuscript will be circulated among the collaborators for further discussion prior  
55  
56 264 to submission for publication. The authors of the IPDMA paper(s) will be the project team managing the

1  
2  
3 265 IPDMA, followed by the collaborators, whom are the principal investigators that collaborated in the current  
4  
5 266 project by sharing their trial data and commenting upon the results and draft of the papers.  
6  
7 267

## 10 268 **Discussion**

11  
12 269 In the last decade, several RCTs found no or very little benefit of APM compared to non-operative or sham  
13  
14 270 treatment in patients with degenerative meniscus tears. [43–52] These findings started a discussion on the  
15  
16 271 effectiveness of the surgery and the methodology used in those RCTs by both orthopedic surgeons and other  
17  
18 272 health care professionals.[19–23,53] The published studies were not able to adequately tease out whether or  
19  
20 273 not there are subgroups that do additionally benefit from APM. This has resulted in a deadlock: APM is  
21  
22 274 continued to be performed, despite Level I evidence that discourage the treatment.[13]

23  
24 275 The proposed IPDMA provides the opportunity to evaluate the relationship between potential  
25  
26 276 clinically-relevant baseline characteristics and the effectiveness of the APM of all patients that have been  
27  
28 277 included in the trials, and to possibly detect subgroups that may benefit from APM. IPDMA is the gold standard  
29  
30 278 of systematic review and meta-analysis that provides more power and is less prone to bias compared to meta-  
31  
32 279 analysis on aggregated data. To our knowledge, this is the first study that combines the individual participant  
33  
34 280 data of RCTs performed on APM, maximizing the capability to detect subgroups that may benefit from the  
35  
36 281 surgery. The main advantage of an IPDMA is that no large-scale RCT is required, but instead the power of  
37  
38 282 existing studies is combined to achieve large patient numbers. This prevents additional trials and patient  
39  
40 283 involvement. Moreover, combining individual patient data enables us to analyze the effects of within-study and  
41  
42 284 between-study moderators of effect sizes, even though the original studies were too small to analyze such  
43  
44 285 samples.

45  
46 286 Although IPDMA is the best method to detect possible subgroups, performing an IPDMA also comes  
47  
48 287 with several challenges. First, all individual patient data from the eligible trials have to be collected. This time-  
49  
50 288 intensive task often requires us to contact the principal investigators multiple times to invite them to  
51  
52 289 collaborate. Unfortunately, data is sometimes not available, not accessible or sharing is not possible due to a  
53  
54 290 stringent informed consent that only enables the use of the data for the original study. While there are guiding  
55  
56 291 principles for open data management and sharing (Findable, Accessible, Interoperable and Reusable data  
57  
58 292 principles (FAIR principles)) these often conflict with the rules of the informed consent or national legislations,  
59  
60

293 creating a tension between privacy and reuse of (anonymous) medical data.[54] This might limit number of  
 294 studies that can be included in this IPDMA. Second, there are multiple ways to measure knee pain, knee  
 295 function or general quality of life. Every researcher can or will use their own set of outcome parameters,  
 296 dependent on the experience of the researcher with a certain questionnaire/scoring system, preference or the  
 297 time-dependent academic insights of the optimal questionnaire/scoring system (especially if studies have been  
 298 published in different time periods, i.e. different research paradigm). As a result, we are dependent on the  
 299 outcomes that have been used in the included studies in the IPDMA and cause systematic missing variables in  
 300 the final pooled dataset of an IPDMA. These missing variables pose a methodological challenge, because they  
 301 require advanced imputation that preserve the hierarchical structure of the data followed by the one-stage  
 302 meta-analysis.[55]

303 In conclusion, the aim of this project is to identify potential subgroups of patients with degenerative  
 304 meniscus lesions who may benefit from APM. It will provide the evidence base to update and tailor diagnostic  
 305 and treatment protocols as well as (international) guidelines for patients for whom orthopedic surgeons  
 306 consider APM. Identifying potential subgroups can improve the quality of life of patients who *do* truly benefit  
 307 from the treatment, and can perhaps be implemented with a clinical decision aid. In case we do not find a  
 308 subgroup that has additional benefits from the treatment, it can help to reduce the number of APMs, and thus  
 309 less risk of, e.g. complications.[9,56]

310

#### 311 **List of abbreviations**

|           |                                                                              |
|-----------|------------------------------------------------------------------------------|
| APM       | Arthroscopic partial meniscectomy                                            |
| RCT       | Randomized controlled trial                                                  |
| IPDMA     | Individual participant data meta-analysis                                    |
| PRISMA-P  | Preferred Reporting Items for Systematic Reviews and Meta-Analysis protocols |
| CENTRAL   | Cochrane Central Register of Controlled Trials                               |
| EROS      | Early Review Organizing Software                                             |
| WHO ICTRP | World Health Organization International Clinical Trials Registry Platform    |
| BMI       | Body mass index                                                              |
| MICE      | Multiple imputations by chained equations                                    |
| KOOS      | Knee injury and Osteoarthritis Outcome Scale                                 |
| EQ5D      | EuroQol-5 dimensions questionnaire                                           |

|   |       |                                                                  |
|---|-------|------------------------------------------------------------------|
| 3 | SF-36 | 36-Item Short Form Survey                                        |
| 4 | REML  | Restricted maximum likelihood                                    |
| 5 | ML    | Maximum likelihood                                               |
| 6 | FAIR  | Findable, Accessible, Interoperable and Reusable data principles |

312

**313 Declarations****314 Ethics approval and consent to participate**

315 All principal investigators provided written confirmation that all participants included in the original trials had  
316 given informed consent.

**317 Consent for publication**

318 Not applicable

**319 Availability of data and material**

320 Following the ICMJE's data sharing statement policy, de-identified individual participant data will be made  
321 available at the end of the research project, including the study protocol, beginning 9 months and ending 36  
322 months following article publication. The data will be shared with investigators whose proposed use of the data  
323 has been approved by a review committee to be identified for this purpose. Proposals may be submitted up to  
324 36 months following article publication. After 36 months the data will be available in our University's data  
325 warehouse without investigator support other than deposited metadata.

**326 Competing interests**

327 The authors declare that they have no competing interest

**328 Funding**

329 Junior Research project (2018) grant provided by the Radboud Institute for Health Sciences, Radboud  
330 University Medical Center, Nijmegen, The Netherlands.

**331 Authors' contributions**

332 SW, MR, JR, and GH drafted the manuscript. All authors read, reviewed and approved the manuscript before  
333 submission.



1  
2  
3 334 **Acknowledgements**  
4

5 335 None  
6  
7  
8 336  
9

10 337 **References**  
11  
12

- 13 338 1. Abrams GD, Frank RM, Gupta AK, Harris JD, McCormick FM, Cole BJ. Trends in meniscus repair and  
14 339 meniscectomy in the United States, 2005-2011. Vol. 41, Am J Sports Med. 2013;41(10):2333-9.  
15  
16 340 2. Cullen KA, Hall MJ, Golosinskiy A. Ambulatory surgery in the United States, 2006. Natl Heal Stat  
17 341 Reports. 2009;(11):1-25.  
18  
19 342 3. Roos E, Lohmander S. [Young patients--old knees. Knee problems in the middle age often  
20 343 osteoarthritis]. Vol. 106, Lakartidningen. 2009;106(24-25):1645-8.  
21  
22 344 4. Buchbinder R, Harris IA, Sprowson A. Management of degenerative meniscal tears and the role of  
23 345 surgery. Vol. 50, Br J Sports Med. 2016;50(22):1413-6.  
24  
25 346 5. Englund M, Roemer FW, Hayashi D, Crema MD, Guermazi A. Meniscus pathology, osteoarthritis and the  
26 347 treatment controversy. Vol. 8, Nat Rev Rheumatol. 2012;8(7):412-9.  
27  
28 348 6. Khan M, Evaniew N, Bedi A, Ayeni OR, Bhandari M. Arthroscopic surgery for degenerative tears of the  
29 349 meniscus: A systematic review and meta-analysis. Vol. 186, CMAJ. 2014;186(14):1057-64.  
30  
31 350 7. Thorlund JB, Juhl CB, Roos EM, Lohmander LS. Arthroscopic surgery for degenerative knee: Systematic  
32 351 review and meta-analysis of benefits and harms. Vol. 49, Br J Sports Med. 2015;49(19):1229-35.  
33  
34 352 8. Englund M. Bout of the corner men and not the boxers? Contextual effects flex their muscles. Vol. 77,  
35 353 Ann Rheum Dis Mon. 2018;77(2).  
36  
37 354 9. Abram SGF, Judge A, Beard DJ, Price AJ. Adverse outcomes after arthroscopic partial meniscectomy: a  
38 355 study of 700 000 procedures in the national Hospital Episode Statistics database for England. Vol. 392,  
39 356 Lancet. 2018;392(10160):2194-202.  
40  
41 357 10. Hawker G, Guan J, Judge A, Dieppe P. Knee arthroscopy in England and Ontario: Patterns of use,  
42 358 changes over time, and relationship to total knee replacement. Vol. 90, J Bone Jt Surg - Am Vol.  
43 359 2008;90(11):2337-45.  
44  
45 360 11. Roemer FW, Kwok CK, Hannon MJ, Hunter DJ, Eckstein F, Grago J, et al. Partial meniscectomy is  
46  
47  
48  
49  
50  
51  
52  
53  
54  
55  
56  
57  
58  
59  
60

- 1  
2  
3 361 associated with increased risk of incident radiographic osteoarthritis and worsening cartilage damage in  
4  
5 362 the following year. Vol. 27, *Eur Radiol*. 2017;27(1):404–13.  
6  
7 363 12. Rongen JJ, Rovers MM, van Tienen TG, Buma P, Hannink G. Increased risk for knee replacement surgery  
8  
9 364 after arthroscopic surgery for degenerative meniscal tears: a multi-center longitudinal observational  
10  
11 365 study using data from the osteoarthritis initiative. Vol. 25, *Osteoarthritis Cartilage*. 2017;25(1):23–9.  
12  
13 366 13. Rongen JJ, van Tienen TG, Buma P, Hannink G. Meniscus surgery is still widely performed in the  
14  
15 367 treatment of degenerative meniscus tears in The Netherlands. Vol. 26, *Knee Surg Sports Traumatol*  
16  
17 368 *Arthrosc*. 2018;26(4):1123–9.  
18  
19 369 14. Thorlund JB, Hare KB, Lohmander LS. Large increase in arthroscopic meniscus surgery in the middle-  
20  
21 370 aged and older population in Denmark from 2000 to 2011. Vol. 85, *Acta Orthop*. 2014;85(3):287–92.  
22  
23 371 15. Lazic S, Boughton O, Hing C, Bernard J. Arthroscopic washout of the knee: A procedure in decline. Vol.  
24  
25 372 21, *Knee*. 2014;21(2):631–4.  
26  
27 373 16. Mattila VM, Sihvonen R, Paloneva J, Felländer-Tsai L. Changes in rates of arthroscopy due to  
28  
29 374 degenerative knee disease and traumatic meniscal tears in Finland and Sweden. Vol. 87, *Acta Orthop*.  
30  
31 375 2016;87(1):5–11.  
32  
33 376 17. Kim S, Bosque J, Meehan JP, Jamali A, Marder R. Increase in outpatient knee arthroscopy in the United  
34  
35 377 States: A comparison of national surveys of ambulatory surgery, 1996 and 2006. Vol. 93, *J Bone Jt Surg -*  
36  
37 378 *Am Vol*. 2011;93(11):994–1000.  
38  
39 379 18. Jevsevar DS, Yates AJ, Sanders JO. Arthroscopic Partial Meniscectomy for Degenerative Meniscal Tear.  
40  
41 380 Vol. 370, *N Engl J Med*. 2014;370(13):1259–61.  
42  
43 381 19. Elattrache N, Lattermann C, Hannon M, Cole B. New England Journal of Medicine article evaluating the  
44  
45 382 usefulness of Meniscectomy is flawed. Vol. 30, *Arthroscopy*. 2014;30(5):542–3.  
46  
47 383 20. Lattermann C, Gomoll A, Cole B. Arthroscopic Partial Meniscectomy for Degenerative Meniscal Tear.  
48  
49 384 Vol. 370, *N Engl J Med*. 2014;370(13):1259–61.  
50  
51 385 21. Krych A, Stuart M LB. Arthroscopic Partial Meniscectomy for Degenerative Meniscal Tear. Vol. 370, *N*  
52  
53 386 *Engl J Med*. 2014;370(13):1259–61.  
54  
55 387 22. Lubowitz JH, D’Agostino RB, Provencher MT, Rossi MJ, Brand JC. Can We Trust Knee Meniscus Studies?  
56  
57 388 One-Way Crossover Confounds Intent-to-Treat Statistical Methods. *Arthroscopy*. 2016;32(11):2187–90.  
58  
59  
60

- 1  
2  
3 389 23. McIntyre LF. Making Sure the Media Gets It Right on Orthopaedic Research. Vol. 32, *Arthroscopy*.  
4  
5 390 2016;32(11):2416–7.  
6  
7 391 24. Katz JN, Wright J, Spindler KP, Mandl LA, Safran-Norton CE, Reinke EK, et al. Predictors and outcomes of  
8  
9 392 crossover to surgery from physical therapy for meniscal tear and osteoarthritis a randomized trial  
10  
11 393 comparing physical therapy and surgery. Vol. 98, *J Bone Jt Surg - Am*. 2016;98(22):1890–6.  
12  
13 394 25. Moher D, Shamseer L, Clarke M, Ghersi D, Liberati A, Petticrew M, et al. Preferred reporting items for  
14  
15 395 systematic review and meta-analysis protocols (PRISMA-P) 2015 statement. Vol. 4, *Syst Rev*. 2015;4:1.  
16  
17 396 26. Tierney JF, Vale C, Riley R, Smith CT, Stewart L, Clarke M, et al. Individual participant data (IPD)  
18  
19 397 metaanalyses of randomised controlled trials: Guidance on their use. Vol. 12, *PLoS Med*. 2015;12(7).  
20  
21 398 27. Hua H, Burke DL, Crowther MJ, Ensor J, Tudur Smith C, Riley RD. One-stage individual participant data  
22  
23 399 meta-analysis models: estimation of treatment-covariate interactions must avoid ecological bias by  
24  
25 400 separating out within-trial and across-trial information. Vol. 36, *Stat Med*. 2017;36(5):772–89.  
26  
27 401 28. Sterne JAC, Sutton AJ, Ioannidis JPA, Terrin N, Jones DR, Lau J, et al. Recommendations for examining  
28  
29 402 and interpreting funnel plot asymmetry in meta-analyses of randomised controlled trials. Vol. 343,  
30  
31 403 *BMJ*. 2011;343(7818):d4002.  
32  
33 404 29. Peters JL, Sutton AJ, Jones DR, Abrams KR, Rushton L. Contour-enhanced meta-analysis funnel plots  
34  
35 405 help distinguish publication bias from other causes of asymmetry. Vol. 61, *J Clin Epidemiol*.  
36  
37 406 2008;61(10):991–6.  
38  
39 407 30. Resche-Rigon M, White IR. Multiple imputation by chained equations for systematically and  
40  
41 408 sporadically missing multilevel data. Vol. 27, *Stat Methods Med Res*. 2018;27(6):1634–49.  
42  
43 409 31. Jolani S, Debray TPA, Koffijberg H, van Buuren S, Moons KGM. Imputation of systematically missing  
44  
45 410 predictors in an individual participant data meta-analysis: A generalized approach using MICE. Vol. 34,  
46  
47 411 *Stat Med*. 2015;34(11):1841–63.  
48  
49 412 32. Burgess S, White IR, Resche-Rigon M, Wood AM. Combining multiple imputation and meta-analysis  
50  
51 413 with individual participant data. Vol. 32, *Stat Med*. 2013;32(26):4499–514.  
52  
53 414 33. Debray TPA, Moons KGM, van Valkenhoef G, Efthimiou O, Hummel N, Groenwold RHH, et al. Get real in  
54  
55 415 individual participant data (IPD) meta-analysis: A review of the methodology. Vol. 6, *Res Synth*  
56  
57 416 *Methods*. 2015;6(4):293–309.  
58  
59  
60

- 1  
2  
3 417 34. Rongen JJ, Hannink G. Comparison of registered and published primary outcomes in randomized  
4  
5 418 controlled trials of orthopaedic surgical interventions. Vol. 98, *J Bone Jt Surg - Am Vol.* 2016;98(5):403–  
6  
7 419 9.  
8  
9 420 35. Burke DL, Ensor J, Riley RD. Meta-analysis using individual participant data: one-stage and two-stage  
10  
11 421 approaches, and why they may differ. Vol. 36, *Stat Med.* 2017;36(5):855–75.  
12  
13 422 36. Knapp G, Hartung J. Improved tests for a random effects meta-regression with a single covariate. Vol.  
14  
15 423 22, *Stat Med.* 2003;22(17):2693–710.  
16  
17 424 37. Turner RM, Omar RZ, Yang M, Goldstein H, Thompson SG. A multilevel model framework for meta-  
18  
19 425 analysis of clinical trials with binary outcomes. Vol. 19, *Stat Med.* 2000;19(24):3417–32.  
20  
21 426 38. Higgins JPT, Whitehead A, Turner RM, Omar RZ, Thompson SG. Meta-analysis of continuous outcome  
22  
23 427 data from individual patients. Vol. 20, *Stat Med.* 2001;20(15):2219–41.  
24  
25 428 39. IntHout J, Ioannidis JPA, Rovers MM, Goeman JJ. Plea for routinely presenting prediction intervals in  
26  
27 429 meta-analysis. Vol. 6, *BMJ open.* 2016;6(7):e010247.  
28  
29 430 40. Stewart GB, Altman DG, Askie LM, Duley L, Simmonds MC, Stewart LA. Statistical Analysis of Individual  
30  
31 431 Participant Data Meta-Analyses: A Comparison of Methods and Recommendations for Practice. Vol. 7,  
32  
33 432 *PLoS ONE.* 2012;7(10):e46042.  
34  
35 433 41. Steyerberg EW. *Clinical Prediction Models: A Practical Approach to Development, Validation, and*  
36  
37 434 *Updating.* New York, NY: Springer New York; 2009.  
38  
39 435 42. Steyerberg EW, Uno H, Ioannidis JPA, van Calster B, Ukaegbu C, Dhingra T, et al. Poor performance of  
40  
41 436 clinical prediction models: the harm of commonly applied methods. Vol. 98, *J Clin Epidemiol.*  
42  
43 437 2018;98:133–43.  
44  
45 438 43. Biedert RM. Treatment of intrasubstance meniscal lesions: a randomized prospective study of four  
46  
47 439 different methods. Vol. 8, *Knee Surg Sports Traumatol Arthrosc.* 2000;8(2):104–8.  
48  
49 440 44. Herrlin S, Hållander M, Wange P, Weidenhielm L, Werner S. Arthroscopic or conservative treatment of  
50  
51 441 degenerative medial meniscal tears: A prospective randomised trial. Vol. 15, *Knee Surg Sports*  
52  
53 442 *Traumatol Arthrosc.* 2007;15(4):393–401.  
54  
55 443 45. Katz JN, Brophy RH, Chaisson CE, de Chaves L, Cole BJ, Dahm DL, et al. Surgery versus Physical Therapy  
56  
57 444 for a Meniscal Tear and Osteoarthritis. Vol. 368, *N Engl J Med.* 2013;368(18):1675–84.  
58  
59  
60

- 1  
2  
3 445 46. Kise NJ, Risberg MA, Stensrud S, Ranstam J, Engebretsen L, Roos EM. Exercise therapy versus  
4  
5 446 arthroscopic partial meniscectomy for degenerative meniscal tear in middle aged patients: Randomised  
6  
7 447 controlled trial with two year follow-up. Vol. 354, BMJ. 2016;354.  
8  
9 448 47. Østerås H, Østerås B, Torstensen TA. Medical exercise therapy, and not arthroscopic surgery, resulted  
10  
11 449 in decreased depression and anxiety in patients with degenerative meniscus injury. Vol. 16, J Bodyw  
12  
13 450 Mov Ther. 2012;16(4):456–63.  
14  
15 451 48. Sihvonen R, Paavola M, Malmivaara A, Itälä A, Joukainen A, Nurmi H, et al. Arthroscopic Partial  
16  
17 452 Meniscectomy versus Sham Surgery for a Degenerative Meniscal Tear. Vol. 369, N Engl J Med.  
18  
19 453 2013;369(26):2515–24.  
20  
21 454 49. Vermesan D, Prejbeanu R, Laitin S, Damian G, Deleanu B, Abbinante A, et al. Arthroscopic debridement  
22  
23 455 compared to intra-articular steroids in treating degenerative medial meniscal tears. Vol. 17, Eur Rev  
24  
25 456 Med Pharmacol Sci. 2013;17(23):3192–6.  
26  
27 457 50. Yim JH, Seon JK, Song EK, Choi JI, Kim MC, Lee KB, et al. A comparative study of meniscectomy and  
28  
29 458 nonoperative treatment for degenerative horizontal tears of the medial meniscus. Vol. 41, Am J Sports  
30  
31 459 Med. 2013;41(7):1565–70.  
32  
33 460 51. Graaf VA van de, Noorduyn JCA, Willigenburg NW, Butter IK, Gast A de, Mol BW, et al. Effect of Early  
34  
35 461 Surgery vs Physical Therapy on Knee Function Among Patients With Nonobstructive Meniscal Tears:  
36  
37 462 The ESCAPE Randomized Clinical Trial. Vol. 320, JAMA. 2018;320(13):1328–37.  
38  
39 463 52. Roos EM, Hare KB, Nielsen SM, Christensen R, Lohmander LS. Better outcome from arthroscopic partial  
40  
41 464 meniscectomy than skin incisions only? A sham-controlled randomised trial in patients aged 35-55  
42  
43 465 years with knee pain and an MRI-verified meniscal tear. Vol. 8, BMJ open. 2018;8(2):e019461.  
44  
45 466 53. Hellerman C. You may not be better off after knee surgery [Internet]. CNN. 2013 [cited 2018 Oct 31].  
46  
47 467 Available from: <https://edition.cnn.com/2013/12/26/health/knee-surgery-study/index.html>  
48  
49 468 54. Wilkinson MD, Dumontier M, Aalbersberg IJ, Appleton G, Axton M, Baak A, et al. The FAIR Guiding  
50  
51 469 Principles for scientific data management and stewardship. Vol. 3, Sci Data. 2016;3:160018.  
52  
53 470 55. Debray T, Jolani S, Schierenberg A, Moons K. Dealing with missing data in an individual participant data  
54  
55 471 meta-analysis: one--stage versus two--stage methods | Colloquium Abstracts. Vol. 23–27 Oct, Abstr  
56  
57 472 24th Cochrane Colloq. 2016;23–27 Oct.  
58  
59  
60

1  
2  
3 473 56. Friberger Pajalic K, Turkiewicz A, Englund M. Update on the risks of complications after knee  
4  
5 474 arthroscopy. Vol. 19, BMC Musculoskelet Disord. 2018;19(1):179.  
6  
7

8 475 **Additional files:**

9  
10 476 File name: Additional file 1

11  
12 477 File format: Additional\_file\_1.doc

13  
14 478 Title: Systematic search of literature to detect randomized controlled trials that compared (partial) arthroscopic  
15  
16 479 meniscectomy to sham surgery or non-surgical techniques.

17  
18 480 Description: The systematic search strategy in Medline (PubMed), Embase, CENTRAL, CINAHL, Web of Science  
19  
20 481 and WHO trial register to detect randomized controlled trials that compared (partial) arthroscopic  
21  
22 482 meniscectomy to sham surgery or non-surgical techniques.  
23

24  
25 483

26 484 File name: Additional file 2

27  
28 485 File format: Additional\_file\_2.doc

29  
30 486 Title: Potential clinically relevant baseline characteristics

31  
32 487 Description: A list of all identified potential clinically relevant baseline characteristics divided into 5 categories:  
33  
34 488 General characteristics, patient history, meniscus information, symptoms and quality of life.  
35  
36  
37  
38  
39  
40  
41  
42  
43  
44  
45  
46  
47  
48  
49  
50  
51  
52  
53  
54  
55  
56  
57  
58  
59  
60

1  
2  
3  
4  
5  
6  
7  
8  
9  
10  
11  
12  
13  
14  
15  
16  
17  
18  
19  
20  
21  
22  
23  
24  
25  
26  
27  
28  
29  
30  
31  
32  
33  
34  
35  
36  
37  
38  
39  
40  
41  
42  
43  
44  
45  
46

**Additional file 1: Systematic search of literature to detect randomized controlled trials that compared (partial) arthroscopic meniscectomy to sham surgery or non-surgical techniques.**

|    | <b>Medline (Pubmed)</b>                         | <b>Embase</b>                                    | <b>Cochrane Database of registered trial (CENTRAL)</b>                                                    | <b>Cumulative Index to Nursing and Allied Health Literature (CINAHL)</b>                                    | <b>Web of Science (Thomson Reuter)</b> | <b>WHO trial register</b>     |
|----|-------------------------------------------------|--------------------------------------------------|-----------------------------------------------------------------------------------------------------------|-------------------------------------------------------------------------------------------------------------|----------------------------------------|-------------------------------|
| 1  | "Menisci, Tibial/surgery"[Mesh]                 | Arthroscopic meniscectomy.ti,ab,kw.              | MeSH descriptor: [Menisci, Tibial] explode all trees and with qualifier(s): [Injuries – IN, Surgery – SU] | TI "Degenerative meniscal tear" OR AB "Degenerative meniscal tear"                                          | arthroscopy AND knee                   | "Menisc*" in the title        |
| 2  | "Menisci, Tibial/injuries"[Mesh]                | Arthroscopic debridement.ti,ab,kw.               | MeSH descriptor: [Arthroscopy] explode all trees                                                          | MH "Arthroscopy" OR "arthroscopy"                                                                           | arthroscopic meniscectomy              | "Menisc*" in the condition    |
| 3  | "Degenerative meniscal tear" [TIAB]             | Arthroscopic lavage.ti,ab,kw.                    | MeSH descriptor: [Knee] explode all trees                                                                 | MH "knee" OR AB "knee" OR TI "knee"                                                                         | arthroscopic debridement               | "Menisc*" in the intervention |
| 4  | "Arthroscopic lavage"[TIAB]                     | Degenerative meniscal tear.ti,ab,kw.             | 2 and 3                                                                                                   | 2 AND 3                                                                                                     | arthroscopic lavage                    | 1 OR 2 OR 3                   |
| 5  | "Arthroscopic debridement"[TIAB]                | knee meniscus/ or meniscus tibial.mp             | Degenerative meniscal tear:ti,ab,kw (Word variations have been searched)                                  | MH "Meniscal Injuries" OR AB "meniscal Injuries" OR TI "meniscal Injuries"                                  | degenerative meniscal tear             |                               |
| 6  | "arthroscopic meniscectomy"[TIAB]               | exp knee arthroscopy/                            | Arthroscopic lavage:ti,ab,kw (Word variations have been searched)                                         | MH "Menisci, Tibial" OR AB "tibial meniscus" OR TI "tibial meniscus"                                        | menisci, tibial AND surgery            |                               |
| 7  | "Arthroscopy"[TIAB] AND "Knee"[TIAB]            | 1 or 2 or 3 or 4 or 5 or 6                       | Arthroscopic debridement:ti,ab,kw (Word variations have been searched)                                    | TI "Arthroscopic lavage" OR AB "Arthroscopic lavage"                                                        | menisci, tibial AND injury             |                               |
| 8  | 1 OR 2 OR 3 OR 4 OR 5 OR 6 OR 7                 | randomized controlled trial/                     | arthroscopic meniscectomy:ti,ab,kw (Word variations have been searched)                                   | TI "Arthroscopic debridement" OR AB "Arthroscopic debridement"                                              | 1 OR 2 OR 3 OR 4 OR 5 OR 6 OR 7        |                               |
| 9  | "Randomized" [TIAB]                             | randomized.ti,ab,kw.                             | 1 or 4 or 5 or 6 or 7 or 8                                                                                | TI "arthroscopic meniscectomy" OR AB "arthroscopic meniscectomy"                                            | randomized                             |                               |
| 10 | "Randomized controlled trial"[Publication Type] | randomized.ti,ab,kw.                             |                                                                                                           | 1 OR 4 OR 5 OR 6 OR 7 OR 8 OR 9                                                                             | randomised                             |                               |
| 11 | "randomized controlled trials as topic"[Mesh]   | random allocation.mp.                            |                                                                                                           | TI "Randomized" OR AB "Randomized"                                                                          | random allocation                      |                               |
| 12 | "Random allocation"[Mesh]                       | randomized.mp.                                   |                                                                                                           | MH "Randomized Controlled Trials" OR TI "Randomized Controlled Trials" OR AB "Randomized Controlled Trials" | control group                          |                               |
| 13 | "Control group"[TIAB]                           | "randomized controlled trial (topic)"/           |                                                                                                           | MH "Random Assignment" OR AB "Random Assignment" OR TI "Random Assignment"                                  | cross-over stud*                       |                               |
| 14 | "Control groups"[Mesh]                          | control group.mp.                                |                                                                                                           | AB "Random Allocation" OR TI "Random Allocation"                                                            | randomized controlled trial            |                               |
| 15 | "Cross-over studies"[TIAB]                      | control group/                                   |                                                                                                           | (MH "Control Group") OR (AB "Control Group") OR (TI "Control Group")                                        | 9 OR 10 OR 11 OR 12 OR 13 OR 14        |                               |
| 16 | "Cross-over study"[TIAB]                        | crossover procedure/                             |                                                                                                           | (MH "Crossover Design") AND (AB "Crossover Design") AND (TI "Crossover Design")                             | 8 AND 15                               |                               |
| 17 | 9 OR 10 OR 11 OR 12 OR 13 OR 14 OR 15 OR 16     | 8 or 9 or 10 or 11 or 12 or 13 or 14 or 15 or 16 |                                                                                                           | 11 OR 12 OR 13 OR 14 OR 15 OR 16                                                                            |                                        |                               |
| 18 | 8 AND 17                                        | 7 and 17                                         |                                                                                                           | 10 AND 17                                                                                                   |                                        |                               |

**Additional file 2. Potential clinically relevant baseline characteristics**

| <b>Category</b>         | <b>Characteristics</b>                                       |
|-------------------------|--------------------------------------------------------------|
| General characteristics |                                                              |
|                         | Age                                                          |
|                         | Gender                                                       |
|                         | Weight, height (BMI)                                         |
| Patient history         |                                                              |
|                         | History of medication for knee symptoms                      |
|                         | History of serious knee injury                               |
|                         | History of knee surgery                                      |
|                         | Family history of knee OA / of knee replacement surgery      |
|                         | History of osteoarthritis                                    |
| Meniscus information    |                                                              |
|                         | Medial/lateral meniscus                                      |
|                         | Radiographic severity of knee OA                             |
|                         | MRI meniscus extrusion                                       |
|                         | MRI meniscus tear type/degeneration                          |
|                         | Onset of symptoms (e.g. gradual, after event, suddenly)      |
|                         | Duration of symptoms                                         |
|                         | Grading of work and sporting activities                      |
| Symptoms                |                                                              |
|                         | Signs and symptoms during specific physical examination test |
|                         | Knee locking symptoms / mechanical symptoms                  |
|                         | Knee-related daily function                                  |
|                         | Knee pain                                                    |
|                         | Knee stiffness                                               |
|                         | Knee-related quality of life                                 |
|                         | Knee swelling                                                |
| Quality of life         |                                                              |
|                         | Generic quality of life (EQ-5D / SF36)                       |
|                         | Mental health score                                          |



**Additional file 1: Systematic search of literature to detect randomized controlled trials that compared (partial) arthroscopic meniscectomy to sham surgery or non-surgical techniques.**

|    | <b>Medline (Pubmed)</b>                         | <b>Embase</b>                                    | <b>Cochrane Database of registered trial (CENTRAL)</b>                                                    | <b>Cumulative Index to Nursing and Allied Health Literature (CINAHL)</b>                                    | <b>Web of Science (Thomson Reuter)</b> | <b>WHO trial register</b>     |
|----|-------------------------------------------------|--------------------------------------------------|-----------------------------------------------------------------------------------------------------------|-------------------------------------------------------------------------------------------------------------|----------------------------------------|-------------------------------|
| 1  | "Menisci, Tibial/surgery"[Mesh]                 | Arthroscopic meniscectomy.ti,ab,kw.              | MeSH descriptor: [Menisci, Tibial] explode all trees and with qualifier(s): [Injuries – IN, Surgery – SU] | TI "Degenerative meniscal tear" OR AB "Degenerative meniscal tear"                                          | arthroscopy AND knee                   | "Menisc*" in the title        |
| 2  | "Menisci, Tibial/injuries"[Mesh]                | Arthroscopic debridement.ti,ab,kw.               | MeSH descriptor: [Arthroscopy] explode all trees                                                          | MH "Arthroscopy" OR "arthroscopy"                                                                           | arthroscopic meniscectomy              | "Menisc*" in the condition    |
| 3  | "Degenerative meniscal tear"[TIAB]              | Arthroscopic lavage.ti,ab,kw.                    | MeSH descriptor: [Knee] explode all trees                                                                 | MH "knee" OR AB "knee" OR TI "knee"                                                                         | arthroscopic debridement               | "Menisc*" in the intervention |
| 4  | "Arthroscopic lavage"[TIAB]                     | Degenerative meniscal tear.ti,ab,kw.             | 2 and 3                                                                                                   | 2 AND 3                                                                                                     | arthroscopic lavage                    | 1 OR 2 OR 3                   |
| 5  | "Arthroscopic debridement"[TIAB]                | knee meniscus/ or meniscus tibial.mp             | Degenerative meniscal tear:ti,ab,kw (Word variations have been searched)                                  | MH "Meniscal Injuries" OR AB "meniscal Injuries" OR TI "meniscal Injuries"                                  | degenerative meniscal tear             |                               |
| 6  | "arthroscopic meniscectomy"[TIAB]               | exp knee arthroscopy/                            | Arthroscopic lavage:ti,ab,kw (Word variations have been searched)                                         | MH "Menisci, Tibial" OR AB "tibial meniscus" OR TI "tibial meniscus"                                        | menisci, tibial AND surgery            |                               |
| 7  | "Arthroscopy"[TIAB] AND "Knee"[TIAB]            | 1 or 2 or 3 or 4 or 5 or 6                       | Arthroscopic debridement:ti,ab,kw (Word variations have been searched)                                    | TI "Arthroscopic lavage" OR AB "Arthroscopic lavage"                                                        | menisci, tibial AND injury             |                               |
| 8  | 1 OR 2 OR 3 OR 4 OR 5 OR 6 OR 7                 | randomized controlled trial/                     | arthroscopic meniscectomy:ti,ab,kw (Word variations have been searched)                                   | TI "Arthroscopic debridement" OR AB "Arthroscopic debridement"                                              | 1 OR 2 OR 3 OR 4 OR 5 OR 6 OR 7        |                               |
| 9  | "Randomized" [TIAB]                             | randomized.ti,ab,kw.                             | 1 or 4 or 5 or 6 or 7 or 8                                                                                | TI "arthroscopic meniscectomy" OR AB "arthroscopic meniscectomy"                                            | randomized                             |                               |
| 10 | "Randomized controlled trial"[Publication Type] | randomized.ti,ab,kw.                             |                                                                                                           | 1 OR 4 OR 5 OR 6 OR 7 OR 8 OR 9                                                                             | randomised                             |                               |
| 11 | "randomized controlled trials as topic"[Mesh]   | random allocation.mp.                            |                                                                                                           | TI "Randomized" OR AB "Randomized"                                                                          | random allocation                      |                               |
| 12 | "Random allocation"[Mesh]                       | randomized.mp.                                   |                                                                                                           | MH "Randomized Controlled Trials" OR TI "Randomized Controlled Trials" OR AB "Randomized Controlled Trials" | control group                          |                               |
| 13 | "Control group"[TIAB]                           | "randomized controlled trial (topic)"/           |                                                                                                           | MH "Random Assignment" OR AB "Random Assignment" OR TI "Random Assignment"                                  | cross-over stud*                       |                               |
| 14 | "Control groups"[Mesh]                          | control group.mp.                                |                                                                                                           | AB "Random Allocation" OR TI "Random Allocation"                                                            | randomized controlled trial            |                               |
| 15 | "Cross-over studies"[TIAB]                      | control group/                                   |                                                                                                           | (MH "Control Group") OR (AB "Control Group") OR (TI "Control Group")                                        | 9 OR 10 OR 11 OR 12 OR 13 OR 14        |                               |
| 16 | "Cross-over study"[TIAB]                        | crossover procedure/                             |                                                                                                           | (MH "Crossover Design") AND (AB "Crossover Design") AND (TI "Crossover Design")                             | 8 AND 15                               |                               |
| 17 | 9 OR 10 OR 11 OR 12 OR 13 OR 14 OR 15 OR 16     | 8 or 9 or 10 or 11 or 12 or 13 or 14 or 15 or 16 |                                                                                                           | 11 OR 12 OR 13 OR 14 OR 15 OR 16                                                                            |                                        |                               |
| 18 | 8 AND 17                                        | 7 and 17                                         |                                                                                                           | 10 AND 17                                                                                                   |                                        |                               |

## Additional file 2. Potential clinically relevant baseline characteristics

| Category                | Characteristics                                              |
|-------------------------|--------------------------------------------------------------|
| General characteristics | Age                                                          |
|                         | Gender                                                       |
|                         | Weight, height (BMI)                                         |
| Patient history         | History of medication for knee symptoms                      |
|                         | History of serious knee injury                               |
|                         | History of knee surgery                                      |
|                         | Family history of knee OA / of knee replacement surgery      |
|                         | History of osteoarthritis                                    |
| Meniscus information    | Medial/lateral meniscus                                      |
|                         | Radiographic severity of knee OA                             |
|                         | MRI meniscus extrusion                                       |
|                         | MRI meniscus tear type / degeneration                        |
|                         | Onset of symptoms (e.g. gradual, after event, suddenly)      |
|                         | Duration of symptoms                                         |
|                         | Grading of work and sporting activities                      |
| Symptoms                | Signs and symptoms during specific physical examination test |
|                         | Knee locking symptoms / mechanical symptoms                  |
|                         | Knee related daily function                                  |
|                         | Knee pain                                                    |
|                         | Knee stiffness                                               |
|                         | Knee related quality of life                                 |
|                         | Knee swelling                                                |
| Quality of life         | Generic quality of life (EQ-5D / SF36)                       |
|                         | Mental health score                                          |

## PRISMA-P 2015 Checklist

This checklist has been adapted for use with systematic review protocol submissions to BioMed Central journals from Table 3 in Moher D et al: Preferred reporting items for systematic review and meta-analysis protocols (PRISMA-P) 2015 statement. *Systematic Reviews* 2015 4:1

An Editorial from the Editors-in-Chief of *Systematic Reviews* details why this checklist was adapted - Moher D, Stewart L & Shekelle P: Implementing PRISMA-P: recommendations for prospective authors. *Systematic Reviews* 2016 5:15

| Section/topic                     | #  | Checklist item                                                                                                                                                                                  | Information reported                |                                     | Line number(s) |
|-----------------------------------|----|-------------------------------------------------------------------------------------------------------------------------------------------------------------------------------------------------|-------------------------------------|-------------------------------------|----------------|
|                                   |    |                                                                                                                                                                                                 | Yes                                 | No                                  |                |
| <b>ADMINISTRATIVE INFORMATION</b> |    |                                                                                                                                                                                                 |                                     |                                     |                |
| <b>Title</b>                      |    |                                                                                                                                                                                                 |                                     |                                     |                |
| Identification                    | 1a | Identify the report as a protocol of a systematic review                                                                                                                                        | <input checked="" type="checkbox"/> | <input type="checkbox"/>            | 1-2            |
| Update                            | 1b | If the protocol is for an update of a previous systematic review, identify as such                                                                                                              | <input type="checkbox"/>            | <input type="checkbox"/>            | NA             |
| <b>Registration</b>               | 2  | If registered, provide the name of the registry (e.g., PROSPERO) and registration number in the Abstract                                                                                        | <input checked="" type="checkbox"/> | <input type="checkbox"/>            | 65, 99         |
| <b>Authors</b>                    |    |                                                                                                                                                                                                 |                                     |                                     |                |
| Contact                           | 3a | Provide name, institutional affiliation, and e-mail address of all protocol authors; provide physical mailing address of corresponding author                                                   | <input checked="" type="checkbox"/> | <input type="checkbox"/>            | 6 - 36         |
| Contributions                     | 3b | Describe contributions of protocol authors and identify the guarantor of the review                                                                                                             | <input checked="" type="checkbox"/> | <input type="checkbox"/>            | 318 - 320      |
| <b>Amendments</b>                 | 4  | If the protocol represents an amendment of a previously completed or published protocol, identify as such and list changes; otherwise, state plan for documenting important protocol amendments | <input type="checkbox"/>            | <input type="checkbox"/>            | NA             |
| <b>Support</b>                    |    |                                                                                                                                                                                                 |                                     |                                     |                |
| Sources                           | 5a | Indicate sources of financial or other support for the review                                                                                                                                   | <input checked="" type="checkbox"/> | <input type="checkbox"/>            | 315-317        |
| Sponsor                           | 5b | Provide name for the review funder and/or sponsor                                                                                                                                               | <input checked="" type="checkbox"/> | <input type="checkbox"/>            | 315-317        |
| Role of sponsor/funder            | 5c | Describe roles of funder(s), sponsor(s), and/or institution(s), if any, in developing the protocol                                                                                              | <input type="checkbox"/>            | <input checked="" type="checkbox"/> |                |
| <b>INTRODUCTION</b>               |    |                                                                                                                                                                                                 |                                     |                                     |                |
| <b>Rationale</b>                  | 6  | Describe the rationale for the review in the context of what is already known                                                                                                                   | <input checked="" type="checkbox"/> | <input type="checkbox"/>            | 75-93          |

| Section/topic                             | #   | Checklist item                                                                                                                                                                                                                              | Information reported                |                                     | Line number(s)              |
|-------------------------------------------|-----|---------------------------------------------------------------------------------------------------------------------------------------------------------------------------------------------------------------------------------------------|-------------------------------------|-------------------------------------|-----------------------------|
|                                           |     |                                                                                                                                                                                                                                             | Yes                                 | No                                  |                             |
| <b>Objectives</b>                         | 7   | Provide an explicit statement of the question(s) the review will address with reference to participants, interventions, comparators, and outcomes (PICO)                                                                                    | <input checked="" type="checkbox"/> | <input type="checkbox"/>            | 94-95                       |
| <b>METHODS</b>                            |     |                                                                                                                                                                                                                                             |                                     |                                     |                             |
| <b>Eligibility criteria</b>               | 8   | Specify the study characteristics (e.g., PICO, study design, setting, time frame) and report characteristics (e.g., years considered, language, publication status) to be used as criteria for eligibility for the review                   | <input checked="" type="checkbox"/> | <input type="checkbox"/>            | 104-113                     |
| <b>Information sources</b>                | 9   | Describe all intended information sources (e.g., electronic databases, contact with study authors, trial registers, or other grey literature sources) with planned dates of coverage                                                        | <input checked="" type="checkbox"/> | <input type="checkbox"/>            | 114-130                     |
| <b>Search strategy</b>                    | 10  | Present draft of search strategy to be used for at least one electronic database, including planned limits, such that it could be repeated                                                                                                  | <input checked="" type="checkbox"/> | <input type="checkbox"/>            | Additional file 1           |
| <b>STUDY RECORDS</b>                      |     |                                                                                                                                                                                                                                             |                                     |                                     |                             |
| Data management                           | 11a | Describe the mechanism(s) that will be used to manage records and data throughout the review                                                                                                                                                | <input checked="" type="checkbox"/> | <input type="checkbox"/>            | 144-155                     |
| Selection process                         | 11b | State the process that will be used for selecting studies (e.g., two independent reviewers) through each phase of the review (i.e., screening, eligibility, and inclusion in meta-analysis)                                                 | <input checked="" type="checkbox"/> | <input type="checkbox"/>            | 130-142                     |
| Data collection process                   | 11c | Describe planned method of extracting data from reports (e.g., piloting forms, done independently, in duplicate), any processes for obtaining and confirming data from investigators                                                        | <input checked="" type="checkbox"/> | <input type="checkbox"/>            | 130-142                     |
| <b>Data items</b>                         | 12  | List and define all variables for which data will be sought (e.g., PICO items, funding sources), any pre-planned data assumptions and simplifications                                                                                       | <input checked="" type="checkbox"/> | <input type="checkbox"/>            | 175-195 + Additional file 2 |
| <b>Outcomes and prioritization</b>        | 13  | List and define all outcomes for which data will be sought, including prioritization of main and additional outcomes, with rationale                                                                                                        | <input checked="" type="checkbox"/> | <input type="checkbox"/>            | 175-195 + Additional file 2 |
| <b>Risk of bias in individual studies</b> | 14  | Describe anticipated methods for assessing risk of bias of individual studies, including whether this will be done at the outcome or study level, or both; state how this information will be used in data synthesis                        | <input checked="" type="checkbox"/> | <input type="checkbox"/>            | 143-174                     |
| <b>DATA</b>                               |     |                                                                                                                                                                                                                                             |                                     |                                     |                             |
| <b>Synthesis</b>                          | 15a | Describe criteria under which study data will be quantitatively synthesized                                                                                                                                                                 | <input type="checkbox"/>            | <input checked="" type="checkbox"/> |                             |
|                                           | 15b | If data are appropriate for quantitative synthesis, describe planned summary measures, methods of handling data, and methods of combining data from studies, including any planned exploration of consistency (e.g., $I^2$ , Kendall's tau) | <input checked="" type="checkbox"/> | <input type="checkbox"/>            | 196-240                     |

| Section/topic                            | #   | Checklist item                                                                                                              | Information reported                |                                     | Line number(s) |
|------------------------------------------|-----|-----------------------------------------------------------------------------------------------------------------------------|-------------------------------------|-------------------------------------|----------------|
|                                          |     |                                                                                                                             | Yes                                 | No                                  |                |
|                                          | 15c | Describe any proposed additional analyses (e.g., sensitivity or subgroup analyses, meta-regression)                         | <input checked="" type="checkbox"/> | <input type="checkbox"/>            | 241-248        |
|                                          | 15d | If quantitative synthesis is not appropriate, describe the type of summary planned                                          | <input type="checkbox"/>            | <input checked="" type="checkbox"/> |                |
| <b>Meta-bias(es)</b>                     | 16  | Specify any planned assessment of meta-bias(es) (e.g., publication bias across studies, selective reporting within studies) | <input checked="" type="checkbox"/> | <input type="checkbox"/>            | 156-165        |
| <b>Confidence in cumulative evidence</b> | 17  | Describe how the strength of the body of evidence will be assessed (e.g., GRADE)                                            | <input type="checkbox"/>            | <input checked="" type="checkbox"/> |                |

# BMJ Open

## Arthroscopic meniscectomy versus non-surgical or sham treatment in patients with degenerative meniscus lesions: a protocol for an individual participant data meta-analysis

|                                 |                                                                                                                                                                                                                                                                                                                                                                                                                                                                                                                                                                                                                                                                                                                                                                                                                                                                                                                                                                                               |
|---------------------------------|-----------------------------------------------------------------------------------------------------------------------------------------------------------------------------------------------------------------------------------------------------------------------------------------------------------------------------------------------------------------------------------------------------------------------------------------------------------------------------------------------------------------------------------------------------------------------------------------------------------------------------------------------------------------------------------------------------------------------------------------------------------------------------------------------------------------------------------------------------------------------------------------------------------------------------------------------------------------------------------------------|
| Journal:                        | <i>BMJ Open</i>                                                                                                                                                                                                                                                                                                                                                                                                                                                                                                                                                                                                                                                                                                                                                                                                                                                                                                                                                                               |
| Manuscript ID                   | bmjopen-2019-031864.R1                                                                                                                                                                                                                                                                                                                                                                                                                                                                                                                                                                                                                                                                                                                                                                                                                                                                                                                                                                        |
| Article Type:                   | Protocol                                                                                                                                                                                                                                                                                                                                                                                                                                                                                                                                                                                                                                                                                                                                                                                                                                                                                                                                                                                      |
| Date Submitted by the Author:   | 04-Nov-2019                                                                                                                                                                                                                                                                                                                                                                                                                                                                                                                                                                                                                                                                                                                                                                                                                                                                                                                                                                                   |
| Complete List of Authors:       | Wijn, Stan; Radboudumc, Department of Operating Rooms Rovers, Maroeska; The Radboud University, Nijmegen Medical Centre, Rongen, Jan; Radboudumc, Operating rooms Østerås, Håvard; Norges Teknisk-Naturvitenskapelige Universitet Fakultet for Medisin og Helsevitenskap, Neuromedicine and Movement Science<br>Risberg, May Arna; Norwegian School of Sport Sciences, Department of Sports Medicine; Oslo universitetssykehus Ulleval, Division of Orthopedic Surgery, Department of Reserach<br>Roos, Ewa; Syddansk Universitet Det Sundhedsvidenskabelige Fakultet, Sports Science and Clinical Biomechanics<br>Hare, Kristoffer; Region Zealand, Department of Orthopedics, Slagelse Medical Hospital<br>van de Graaf, VA; Spaarne Gasthuis, Department of Orthopaedic Surgery, Joint Research<br>Poolman, Rudolf; Onze Lieve Vrouwe Gasthuis, Orthopaedic Surgery<br>Englund, Martin; Lund University, Dept of Orthopedics<br>Hannink, Gerjon; Radboudumc, Department of Operating Rooms |
| <b>Primary Subject Heading</b>: | Surgery                                                                                                                                                                                                                                                                                                                                                                                                                                                                                                                                                                                                                                                                                                                                                                                                                                                                                                                                                                                       |
| Secondary Subject Heading:      | Sports and exercise medicine                                                                                                                                                                                                                                                                                                                                                                                                                                                                                                                                                                                                                                                                                                                                                                                                                                                                                                                                                                  |
| Keywords:                       | Arthroscopic surgery, Meniscectomy, Osteoarthritis, Individual Participant Data Meta-Analysis, IPDMA                                                                                                                                                                                                                                                                                                                                                                                                                                                                                                                                                                                                                                                                                                                                                                                                                                                                                          |
|                                 |                                                                                                                                                                                                                                                                                                                                                                                                                                                                                                                                                                                                                                                                                                                                                                                                                                                                                                                                                                                               |

SCHOLARONE™  
Manuscripts



I, the Submitting Author has the right to grant and does grant on behalf of all authors of the Work (as defined in the below author licence), an exclusive licence and/or a non-exclusive licence for contributions from authors who are: i) UK Crown employees; ii) where BMJ has agreed a CC-BY licence shall apply, and/or iii) in accordance with the terms applicable for US Federal Government officers or employees acting as part of their official duties; on a worldwide, perpetual, irrevocable, royalty-free basis to BMJ Publishing Group Ltd ("BMJ") its licensees and where the relevant Journal is co-owned by BMJ to the co-owners of the Journal, to publish the Work in this journal and any other BMJ products and to exploit all rights, as set out in our [licence](#).

The Submitting Author accepts and understands that any supply made under these terms is made by BMJ to the Submitting Author unless you are acting as an employee on behalf of your employer or a postgraduate student of an affiliated institution which is paying any applicable article publishing charge ("APC") for Open Access articles. Where the Submitting Author wishes to make the Work available on an Open Access basis (and intends to pay the relevant APC), the terms of reuse of such Open Access shall be governed by a Creative Commons licence – details of these licences and which [Creative Commons](#) licence will apply to this Work are set out in our licence referred to above.

Other than as permitted in any relevant BMJ Author's Self Archiving Policies, I confirm this Work has not been accepted for publication elsewhere, is not being considered for publication elsewhere and does not duplicate material already published. I confirm all authors consent to publication of this Work and authorise the granting of this licence.

1  
2  
3  
4 1 **Arthroscopic meniscectomy versus non-surgical or sham treatment in patients with degenerative meniscus**  
5  
6 2 **lesions: a protocol for an individual participant data meta-analysis**  
7

8 3 Stan R.W. Wijn<sup>1</sup>, Maroeska M. Rovers<sup>1</sup>, Jan J. Rongen<sup>1</sup>, Håvard Østerås<sup>2</sup>, May A. Risberg<sup>3</sup>, Ewa M. Roos<sup>4</sup>,  
9  
10 4 Kristoffer B. Hare<sup>5</sup>, Victor A. van de Graaf<sup>6</sup>, Rudolf W. Poolman<sup>6</sup>, Martin Englund<sup>7</sup>, Gerjon Hannink<sup>1</sup>  
11  
12 5

13  
14 6 <sup>1</sup> Radboud University Medical Center, Radboud Institute for Health Sciences, Department of Operating Rooms, Nijmegen, the Netherlands

15 7 <sup>2</sup> Norwegian University of Science and Technology, Faculty of Medicine and Health Sciences, Department of Neuromedicine and Movement  
16  
17 8 Science, Trondheim, Norway

18  
19 9 <sup>3</sup> Norwegian School of Sport Sciences, Department of Sport Medicine, and Division of Orthopedic Surgery, Oslo University Hospital, Oslo,  
20  
21 10 Norway

22 11 <sup>4</sup> University of Southern Denmark, Musculoskeletal Function and Physiotherapy and Center for Muscle and Joint Health, Department of  
23  
24 12 Sports and Clinical Biomechanics, Odense, Denmark

25 13 <sup>5</sup> University of Southern Denmark, Institute of Sports Science and Clinical Biomechanics, Department of Orthopedics, Odense, Denmark

26 14 <sup>6</sup> OLVG, Joint Research, Department of Orthopaedic Surgery, Amsterdam, the Netherlands

27 15 <sup>7</sup> Lund University, Faculty of Medicine, Department of Clinical Sciences Lund, Orthopaedics, Clinical Epidemiology Unit, Lund, Sweden  
28  
29  
30  
31

32 17 Stan R.W. Wijn<sup>1</sup>, Stan.Wijn@radboudumc.nl

33 18 Maroeska M. Rovers<sup>1</sup>, Maroeska.Rovers@radboudumc.nl

34 19 Jan J. Rongen<sup>1</sup>, Jan.Rongen@radboudumc.nl

35 20 Håvard Østerås<sup>2</sup>, Havard.Osteras@ntnu.no

36 21 May A. Risberg<sup>3</sup>, M.a.Risberg@nih.no

37 22 Ewa M. Roos<sup>4</sup>, ERoos@health.sdu.dk

38 23 Kristoffer B. Hare<sup>5</sup>, Kbh@regionsjaelland.dk

39 24 Victor A. van de Graaf<sup>6</sup>, vandeGraaf@gmail.com

40 25 Rudolf W. Poolman<sup>6</sup>, RWP@jointresearch.org

41 26 Martin Englund<sup>7</sup>, Martin.Englund@med.lu.se

42 27 Gerjon Hannink<sup>1</sup>, Gerjon.Hannink@radboudumc.nl  
43  
44  
45  
46  
47  
48

49 29 Physical mailing address of the corresponding author:

50  
51 30 Stan R.W. Wijn

52 31 Radboud university medical center

53 32 715 Department of Operating Rooms

54 33 P.O. Box 9101

55 34 6500 HB Nijmegen

56 35 The Netherlands  
57  
58

59 37 Word count: 3223  
60



1  
2  
3 38 **Abstract**

4  
5 39 **Introduction**

6  
7  
8 40 Arthroscopic partial meniscectomy (APM) after degenerative meniscus tears is one of the most frequently  
9  
10 41 performed surgeries in orthopedics. Although several randomized controlled trials (RCTs) have been published  
11  
12 42 that showed no clear benefit compared to sham treatment or non-surgical treatment, the incidence of APM  
13  
14 43 remains high. The common perception by most orthopedic surgeons is that there are subgroups of patients  
15  
16 44 that *do* need APM to improve, and they argue that each study sample of the existing trials is not representative  
17  
18 45 for the day-to-day patients in the clinic. Therefore, the objective of this individual participant data meta-  
19  
20 46 analysis (IPDMA) is to assess whether there are subgroups of patients with degenerative meniscus lesions who  
21  
22 47 benefit from APM in comparison with non-surgical or sham treatment.

23  
24  
25 48 **Methods and Analysis**

26  
27 49 An existing systematic review will be updated to identify all RCTs worldwide that evaluated APM compared to  
28  
29 50 sham- or non-surgical treatment in patients with knee symptoms and degenerative meniscus tears. Time and  
30  
31 51 effort will be spent in contacting principal investigators of the original trials and encourage them to collaborate  
32  
33 52 in this project by sharing their trial data. All individual participant data will be validated for missing data,  
34  
35 53 internal data consistency, randomization integrity and censoring patterns. After validation, all datasets will be  
36  
37 54 combined and analyzed using a one- and two-staged approach. The most important outcome will be the  
38  
39 55 difference between APM and control groups in knee pain, function and quality of life 2 years after the  
40  
41 56 intervention. Other outcomes of interest will include the difference in adverse events and mental health.

42  
43  
44 57 **Ethics and dissemination**

45  
46  
47 58 This IPDMA will provide the evidence base to update and tailor diagnostic and treatment protocols as well as  
48  
49 59 (international) guidelines for patients for whom orthopedic surgeons consider APM. The results will be  
50  
51 60 submitted for publication in a peer-reviewed journal.

52  
53 61 **Registration**

54  
55 62 Prospero registration number: CRD42017067240

56  
57 63 **Keywords**

58  
59  
60 64 Arthroscopic surgery; Meniscectomy; Osteoarthritis; Individual Participant Data Meta-Analysis; IPDMA

1  
2  
3 65 **Article Summary**  
4

5 66 **Strengths and limitations of this study**  
6

- 7 67 • To our knowledge, this is the first study that combines the individual participant data of RCTs  
8  
9 68 performed on APM, maximizing the capability to detect subgroups that may benefit from the surgery.  
10  
11 69 • The main advantage of an IPDMA is that no large-scale RCT is required, but instead the power of  
12  
13 70 existing studies is combined to achieve large patient numbers.  
14  
15 71 • Trial data might not be available, not accessible or sharing is not possible due to a stringent informed  
16  
17 72 consent that only enables the use of the data for the original study. This might limit the amount of  
18  
19 73 trials we can include.  
20  
21 74 • We are dependent on the outcomes that have been used in the included studies. These can differ  
22  
23 75 between studies.  
24  
25  
26 76  
27  
28  
29  
30  
31  
32  
33  
34  
35  
36  
37  
38  
39  
40  
41  
42  
43  
44  
45  
46  
47  
48  
49  
50  
51  
52  
53  
54  
55  
56  
57  
58  
59  
60

## 77 **Background**

78 Arthroscopic partial meniscectomy (APM) is a regularly performed surgical procedure intended to treat  
79 symptoms believed to be caused by degenerative meniscus lesions. [1–3] Degenerative lesions are typically  
80 observed in middle-aged and older people, and are caused by chronic degenerative processes. [4,5] Over the  
81 past decade, evidence has accumulated that questions both the rationale for, and the effectiveness of APM for  
82 degenerative meniscus lesions. [6,7] Additionally, concerns have been expressed on the harms associated with  
83 the procedure [7–9] and the potential detrimental effect of the procedure on the progression of osteoarthritis.  
84 [10–12] Still, the number of surgical procedures performed in the treatment of degenerative meniscus lesions  
85 remains high. [13–17]

86 Orthopedic surgeons have expressed concerns about the generalizability of the trial results and point  
87 out that the study samples are not representative of the subjects they select for surgery in their day-to-day  
88 clinical practice.[18–24] The common perception by most surgeons is that there are subgroups of patients that  
89 *do* need the procedure to improve.[8] Hence, applying the mean effects of randomized controlled trials (RCTs)  
90 to individual patients in day-to-day practice runs against the intuitive approach of doctors to use the specific  
91 characteristics of a particular patient to tailor management accordingly. Unfortunately, the identification of  
92 subgroups of patients that may/may not benefit from the procedure has been problematic, as the individual  
93 trials performed so far were too small to perform valid and reliable subgroup analyses.

94 An individual participant data meta-analysis (IPDMA), i.e. a meta-analysis on the original individual  
95 participant data of previously performed trials, has been described as the gold standard of systematic review  
96 and meta-analysis. An IPDMA offers the unique opportunity to recode, and re-analyze all original trial data, and  
97 evaluate the effectiveness of surgical treatment of degenerative meniscus lesions and to identify potential  
98 subgroups more likely to benefit from the intervention. Identifying these subgroups can assist physicians to  
99 make personalized treatment decisions and thereby improving the overall quality of life of patients that are  
100 currently selected for APM.

101 Therefore, the objective of this IPDMA is to assess whether there are subgroups of patients with  
102 degenerative meniscus lesions who benefit from APM in comparison with non-surgical or sham treatment.

103

104

## 105 **Methods**

106 The protocol is reported according to the Preferred Reporting Items for Systematic Reviews and Meta-Analysis  
107 protocols (PRISMA-P) statement and is registered in PROSPERO with registration number: CRD42017067240.

108 [25] The first part of the method section describes a regular systematic review to identify eligible papers and  
109 invite the study authors to collaborate and contribute data. The second part describes the analysis with the  
110 individual participant data.

## 111 **Patient and Public Involvement**

112 Patients and members of the public were not involved in development of the protocol. A panel of patient  
113 representatives will provide detailed input regarding outcomes and the interpretation of the results from this  
114 IPDMA.

## 116 **Part 1: Identifying eligible papers & data collection**

### 117 **Eligibility criteria**

118 This IPDMA will include RCTs that evaluated the effectiveness of (partial) meniscectomy compared to non-  
119 surgical or sham treatments in persons with MRI-verified degenerative meniscus lesions. Degenerative  
120 meniscus lesions are typically observed in middle-aged and older people and may be the result of early  
121 degenerative knee disease. Persistent knee symptoms may encompass knee pain, limitation of function, and  
122 mechanical symptoms such as the sensation of catching or locking of the knee. Non-surgical or sham  
123 treatments may include, but are not limited to, sham surgery, pain and/or anti-inflammatory medication,  
124 exercise programs, and/or watchful waiting. Trials that included persons with traumatic meniscal lesions,  
125 defined as being the result of a specific traumatic incident will be excluded. There will be no restrictions on  
126 publication date, type of setting, length of follow up, or language.

### 127 **Identification and selection of eligible trials**

128 The search strategy described by Thorlund et al. [7] will be adopted to systematically search for eligible trials in  
129 Medline, Embase, CINAHL, Web of Science, and the Cochrane Central Register of Controlled Trials (CENTRAL).  
130 (Additional file 1) The identified studies will be exported to EROS (Early Review Organizing Software, developed  
131 by Institute of Clinical Effectiveness and Health Policy, Buenos Aires, Argentina) to remove duplicates, and

1  
2  
3 132 randomly allocate references to two independent reviewers responsible for screening and selection. The two  
4  
5 133 reviewers will independently screen all titles and abstracts of identified reports for eligibility. Full-text copies of  
6  
7 134 all publications regarded as potentially eligible for inclusion, or where there is any uncertainty, will  
8  
9 135 subsequently be assessed. Trials will be included when they meet the eligibility criteria. Any discrepancies  
10  
11 136 between reviewers will be resolved by discussion, and if necessary, a third reviewer will be consulted. In  
12  
13 137 addition, the reference lists of included studies will be reviewed to identify additional eligible trials. The  
14  
15 138 electronic database search will be supplemented by searching for additional eligible trials in the World Health  
16  
17 139 Organization International Clinical Trials Registry Platform (WHO ICTRP) search portal, which contains the trial  
18  
19 140 registration datasets provided by several registries. This portal includes 16 national and international primary  
20  
21 141 registries, including ClinicalTrials.gov, ANZCTR, JPRN, and ISRCTN. The corresponding authors of eligible trials  
22  
23 142 will be invited to collaborate in the current IPDMA by sharing their data.

#### 24 25 26 143 **Collection of individual participant data**

#### 27 28 144 **Data collection and transfer**

29  
30  
31 145 Time and effort will be spent in tracing and encouraging original investigators to share their trial data. If no  
32  
33 146 reply is received on a first invitation, additional inquiries will be sent, including inquiries sent to alternative  
34  
35 147 email addresses identified for the corresponding author, inquiries sent to listed co-authors, and to the  
36  
37 148 institution of the corresponding author listed in the original publication. The principal investigators of the  
38  
39 149 original trials collaborating in the current project will be encouraged to actively participate in the IPDMA and  
40  
41 150 discuss and finalize the definitions and outcomes to be assessed and the analytical processes proposed. Where  
42  
43 151 possible, a face-to-face collaborator meeting will be scheduled, at which key decisions, including the project  
44  
45 152 design, analysis plan, and interpretation of findings will be discussed. Before sharing of the de-identified data,  
46  
47 153 we will sign a data sharing agreement with those principal investigators of the original trials that are interested  
48  
49 154 in collaboration, in which we will arrange that the research data will be used for the declared purposes and the  
50  
51 155 data will be stored on secured servers located in the Netherlands.

#### 52 53 54 156 **Data check and risk of bias**

55  
56 157 All received data will first be validated to match the results of the original publication. Statistical tests will be  
57  
58 158 repeated and analyzed in R (R Foundation for Statistical Computing, Vienna, Austria). The trial data provided by  
59  
60

1  
2  
3 159 original investigators will be checked for consistency, plausibility, integrity of randomization, and  
4  
5 160 reproducibility of published trial results. The aims of checking data are to increase the probability that data  
6  
7 161 supplied are accurate, and to confirm that trials were appropriately randomized. Inconsistencies will be  
8  
9 162 discussed and resolved with the individual investigators. All checked and de-identified data of randomized  
10  
11 163 participants will be entered into a pooled database, and every trial will be assigned a trial number. Data will  
12  
13 164 include characteristics relating to the participants (age, gender, body mass index (BMI)); radiographic  
14  
15 165 information on knee osteoarthritis; onset, duration, and severity of symptoms; generic and disease-specific  
16  
17 166 health-related quality-of-life); non-surgical or sham procedure; trial (sample size, setting, allocation  
18  
19 167 concealment); and outcome measures of interest. For eligible trials of which original data is not available the  
20  
21 168 aggregated data from trial reports will be collected.

22  
23 169         Checking the IPD directly can provide more reliable investigations of key potential biases, some of  
24  
25 170 which might be reduced or alleviated in the process. The risk of bias in included trials will be independently  
26  
27 171 assessed by checking the IPD directly. Randomization and allocation concealment will be assessed by checking  
28  
29 172 if both treatment arms are balanced in every study.[26] The advantage of an IPDMA is that we can also include  
30  
31 173 outcomes not reported by the original journal article, possibly reducing outcome reporting bias by checking all  
32  
33 174 relevant outcomes at the same time. In order to avoid ecological bias, the within-trial information will be  
34  
35 175 examined for individual predictors of treatment effect, separately from the across-trial information.[27]  
36  
37 176 The potential for publication bias and small study effects will be examined, in the context of visual inspection,  
38  
39 177 using a contour-enhanced funnel plot.[28,29] To avoid availability bias, aggregated data from studies lacking  
40  
41 178 individual participant data will be used to consider their potential impact.

#### 42 43 44 179 **Missing data**

45  
46 180 The final IPDMA dataset will have a multilevel (i.e. clustered) structure, where the individual trials are the levels  
47  
48 181 (i.e. clusters). A foreseen feature of this dataset will be that some variables will be systematically missing, that  
49  
50 182 is missing for all individuals in one or more trials. Next to systematically missing variables, we may also  
51  
52 183 encounter sporadically missing variables, that is missing for some but not all individuals in one or more trials.

53  
54  
55 184         In order to optimally use the available participant data, reduce bias, and to increase statistical efficiency,  
56  
57 185 incomplete data will be imputed using imputation methods that handle both systematically and sporadically  
58  
59  
60

186 missing covariates in a two-level structure using hierarchical multiple imputations by chained equations (MICE).  
187 [30–33]

## 188 **Outcomes variables**

189 The most important outcomes according to surgeons and patients is treatment effect, determined as the  
190 difference between the intervention (surgery) and control group (non-surgical treatment) in knee pain,  
191 function and quality of life 2 years after the intervention. The preferred outcome measure instrument will be  
192 the Knee injury and Osteoarthritis Outcome Scale (KOOS). The KOOS is an instrument developed with the  
193 purpose of evaluating short-term and long-term symptoms and function in subjects with a knee injury and  
194 osteoarthritis. The KOOS consists of 5 subscales: pain, other symptoms, function in daily living, function in sport  
195 and recreation, and knee-related quality of life and a composite score can be calculated (referred to as the  
196 KOOS5). The KOOS has been validated for several orthopedic interventions such as anterior cruciate ligament  
197 reconstruction, meniscectomy and total knee replacement. [34] The score of the KOOS pain subscales will be  
198 compared between the intervention and control group across the included studies. Other measurement  
199 instrument targeted at quantifying pain will be standardized and combined in one single pain outcome. The  
200 functional outcome will be measured by using the KOOS function subscale or equivalent outcome aimed to  
201 measure function. The health quality of life will be measured by using the EuroQol-5 dimensions (EQ5D)  
202 questionnaire or the 36-Item Short Form Survey (SF-36).

203 Other outcomes of interest will include the difference between intervention and control group in adverse  
204 events (defined as deep venous thrombosis, pulmonary thromboembolism, venous thromboembolism,  
205 infection, and death) associated with the intervention from baseline to 2 years after intervention; difference in  
206 mental health; difference in risk for future knee replacement surgery between groups (feasibility will depend  
207 on whether the follow up of the trials will be long enough to capture the events), and the effect of follow-up  
208 time after the intervention on the treatment effect.

## 209 **Part 2: Analysis**

### 210 **Treatment effect**

211 The IPDMA will be used to assess the general effectiveness of APM in comparison with non-surgical or sham  
212 treatments in patients with knee symptoms and degenerative meniscal lesions. For this part, we will apply both

1  
2  
3 213 a two-stage and one-stage approach.[35] In the two-stage approach, we will perform regression analyses for  
4  
5 214 each study to obtain effect estimates separately. Thereafter these are pooled in a random effects model (to  
6  
7 215 account for heterogeneity) like a regular meta-analysis. The random effects models in the two-stage will be  
8  
9 216 analyzed using the restricted maximum likelihood (REML) approach with the Hartung-Knapp-Sidik-Jonkman  
10  
11 217 method for continuous outcomes to account for uncertainty due to heterogeneity.[36] The two-stage approach  
12  
13 218 is ideal for assessing pooled treatment effect and detect heterogeneity. However, it is difficult to detect non-  
14  
15 219 linear trends or account for correlating covariates.

17 220 In the one-stage approach, the IPD from all studies will be analyzed simultaneously by adopting a  
18  
19 221 single statistical model (random effects model) that fully accounts for heterogeneity across studies whilst  
20  
21 222 accounting for the clustering of participants within studies. The one-stage approach is more flexible and more  
22  
23 223 exact compared to the two-stage but can face computational difficulties. Therefore, the results from the one-  
24  
25 224 stage will be compared to the results of the two-stage and differences will be investigated. The random effects  
26  
27 225 models in the one-stage will be analyzed using the REML approach with the Kenward-Rogers approach for  
28  
29 226 continuous outcome and the maximum likelihood method (ML) with quadrature for binary or survival  
30  
31 227 outcomes.[35,37,38] Heterogeneity will be addressed by  $I^2$  and  $\tau^2$ , reflecting the heterogeneity between  
32  
33 228 studies. To reflect the variation of the treatment effect in a different setting, 95% prediction intervals will be  
34  
35 229 reported to provide more information on the expected effect in future patients.[39]

37 230 A key advantage of a one-stage approach is the flexibility in terms of the models that may be fitted  
38  
39 231 compared to a two-stage approach. One-stage models allow for the inclusion of multiple covariates in a single  
40  
41 232 model, multiple random-effects on different parameters, correlation between covariates and the separation of  
42  
43 233 within and across-trials information. It is this flexibility that is essential to the primary objective of this IPDMA.  
44  
45 234 [40]

#### 235 **Heterogeneity in treatment effect (subgroups)**

51 236 To investigate which patients may benefit from (partial) meniscectomy we will assess whether the treatment  
52  
53 237 effect is modified by baseline patient characteristics. First, relevant baseline patient characteristics will be  
54  
55 238 identified. Modern regression procedures with penalization of estimated regression coefficients will be applied  
56  
57 239 for the selection of those characteristics that are independent predictors of the treatment effect.[41,42] A full  
58  
59 240 list of the baseline patient characteristics that will be taken into consideration are listed in Additional file 2.  
60



1  
2  
3 241 Second, it will be assessed whether these identified independent baseline predictors, (individually or in  
4  
5 242 combinations) modify the treatment effect. Effect modification will be assessed with a random effects model.  
6  
7 243 In this model, a dummy for the particular study will be the random effect and APM (yes vs. no), the potential  
8  
9 244 effect modifier, and an interaction term (APM \* potential effect modifier) will be included as fixed variables  
10  
11 245 and the treatment effect as dependent variables.[33] The illustrated approach will allow assessment of effect  
12  
13 246 modification without overfitting the data and reducing the risk of type I errors.

15 247 In addition, we want to ensure that patient characteristics deemed to be of high clinical relevance in day-  
16  
17 248 to-day clinical practice are ultimately evaluated for effect modification. For this purpose, alongside the  
18  
19 249 procedure described above, we will also assess a set of predefined patient characteristics deemed to be of high  
20  
21 250 clinical relevance for effect modification. To define these characteristics the IPDMA collaborators will be asked  
22  
23 251 to provide a top-3 of characteristics that they regard as most clinically relevant. Subsequently, it will be  
24  
25 252 assessed whether the overall top-3 of these predefined patient characteristics modify the treatment effect.  
26  
27 253 Predefining these characteristics will be performed before actual analysis of the data.

### 254 **Sensitivity analysis**

31  
32  
33 255 To analyze the robustness of the results from the IPDMA, several sensitivity analyses will be performed. First,  
34  
35 256 to evaluate the impact of including aggregated data of published trials (of which the IPD was not available in  
36  
37 257 the meta-analysis), analyses will be performed in which we either only include studies with IPD available or  
38  
39 258 only studies of which only aggregated data was available. Second, to determine the effect of imputation of  
40  
41 259 missing values on the study outcome, analyses will be performed in which we impute either only systematic  
42  
43 260 missing variables, only sporadically missing variables (within trials) or not impute at all. Third, we will study  
44  
45 261 whether the persistence of complains is a relevant subgrouping variable.

46  
47 262 All analyses will be performed according to the intention-to-treat principle.

### 49 263 **Publication considerations**

51  
52 264 The draft version of the final manuscript will be circulated among the collaborators for further discussion prior  
53  
54 265 to submission for publication. The authors of the IPDMA paper(s) will be the project team managing the  
55  
56 266 IPDMA, followed by the collaborators, whom are the principal investigators that collaborated in the current  
57  
58 267 project by sharing their trial data and commenting upon the results and draft of the papers.  
59  
60

1  
2  
3 268 **Study status**  
4  
5

6 269 Currently, we are contacting the original investigators of the included trials and encourage them to share the  
7  
8 270 trial data. We aim to start the analyses at the end of 2019 and publish our results in 2020/2021.  
9

10 271

11  
12  
13 272 **Discussion**  
14

15 273 In the last decade, several RCTs found no or very little benefit of APM compared to non-operative or sham  
16  
17 274 treatment in patients with MRI confirmed degenerative meniscus tears,[43–52] although there is circumstantial  
18  
19 275 evidence that it is effective in middle-aged patients with degenerative meniscal symptoms.[53] These findings  
20  
21 276 started a discussion on the effectiveness of the surgery and the methodology used in those RCTs by both  
22  
23 277 orthopedic surgeons and other health care professionals.[19–23,54] The published studies were not able to  
24  
25 278 adequately tease out whether or not there are subgroups that do additionally benefit from APM. This has  
26  
27 279 resulted in a deadlock: APM is continued to be performed, despite Level I evidence that discourage the  
28  
29 280 treatment.[13]

30  
31 281 The proposed IPDMA provides the opportunity to evaluate the relationship between potential  
32  
33 282 clinically-relevant baseline characteristics and the effectiveness of the APM of all patients that have been  
34  
35 283 included in the trials, and to possibly detect subgroups that may benefit from APM. IPDMA is the gold standard  
36  
37 284 of systematic review and meta-analysis that provides more power and is less prone to bias compared to meta-  
38  
39 285 analysis on aggregated data. To our knowledge, this is the first study that combines the individual participant  
40  
41 286 data of RCTs performed on APM, maximizing the capability to detect subgroups that may benefit from the  
42  
43 287 surgery. The main advantage of an IPDMA is that no large-scale RCT is required, but instead the power of  
44  
45 288 existing studies is combined to achieve large patient numbers. This prevents additional trials and patient  
46  
47 289 involvement. Moreover, combining individual patient data enables us to analyze the effects of within-study and  
48  
49 290 between-study moderators of effect sizes, even though the original studies were too small to analyze such  
50  
51 291 samples.  
52

53  
54 292 Although IPDMA is the best method to detect possible subgroups, performing an IPDMA also comes  
55  
56 293 with several challenges. First, all individual patient data from the eligible trials have to be collected. This time-  
57  
58 294 intensive task often requires us to contact the principal investigators multiple times to invite them to  
59  
60 295 collaborate. Unfortunately, data is sometimes not available, not accessible or sharing is not possible due to a

1  
2  
3 296 stringent informed consent that only enables the use of the data for the original study. While there are guiding  
4  
5 297 principles for open data management and sharing (Findable, Accessible, Interoperable and Reusable data  
6  
7 298 principles (FAIR principles)) these often conflict with the rules of the informed consent or national legislations,  
8  
9 299 creating a tension between privacy and reuse of (anonymous) medical data.[55] This might limit number of  
10  
11 300 studies that can be included in this IPDMA. Second, there are multiple ways to measure knee pain, knee  
12  
13 301 function or general quality of life. Every researcher can or will use their own set of outcome parameters,  
14  
15 302 dependent on the experience of the researcher with a certain questionnaire/scoring system, preference or the  
16  
17 303 time-dependent academic insights of the optimal questionnaire/scoring system (especially if studies have been  
18  
19 304 published in different time periods, i.e. different research paradigm). As a result, we are dependent on the  
20  
21 305 outcomes that have been used in the included studies in the IPDMA and cause systematic missing variables in  
22  
23 306 the final pooled dataset of an IPDMA. These missing variables pose a methodological challenge, because they  
24  
25 307 require advanced imputation that preserve the hierarchical structure of the data followed by the one-stage  
26  
27 308 meta-analysis.[56]

29 309 In conclusion, the aim of this project is to identify potential subgroups of patients with degenerative  
30  
31 310 meniscus lesions who may benefit from APM. It will provide the evidence base to update and tailor diagnostic  
32  
33 311 and treatment protocols as well as (international) guidelines for patients for whom orthopedic surgeons  
34  
35 312 consider APM. Identifying potential subgroups can improve the quality of life of patients who *do* truly benefit  
36  
37 313 from the treatment, and can perhaps be implemented with a clinical decision aid. In case we do not find a  
38  
39 314 subgroup that has additional benefits from the treatment, it can help to reduce the number of APMs, and thus  
40  
41 315 less risk of, e.g. complications.[9,57]

316

#### 317 **List of abbreviations**

|    |           |                                                                              |
|----|-----------|------------------------------------------------------------------------------|
| 49 | APM       | Arthroscopic partial meniscectomy                                            |
| 50 | RCT       | Randomized controlled trial                                                  |
| 51 | IPDMA     | Individual participant data meta-analysis                                    |
| 52 | PRISMA-P  | Preferred Reporting Items for Systematic Reviews and Meta-Analysis protocols |
| 53 | CENTRAL   | Cochrane Central Register of Controlled Trials                               |
| 54 | EROS      | Early Review Organizing Software                                             |
| 55 | WHO ICTRP | World Health Organization International Clinical Trials Registry Platform    |
| 56 | BMI       | Body mass index                                                              |

|   |       |                                                                  |
|---|-------|------------------------------------------------------------------|
| 1 |       |                                                                  |
| 2 |       |                                                                  |
| 3 | MICE  | Multiple imputations by chained equations                        |
| 4 | KOOS  | Knee injury and Osteoarthritis Outcome Scale                     |
| 5 | EQ5D  | EuroQol-5 dimensions questionnaire                               |
| 6 | SF-36 | 36-Item Short Form Survey                                        |
| 7 | REML  | Restricted maximum likelihood                                    |
| 8 | ML    | Maximum likelihood                                               |
| 9 | FAIR  | Findable, Accessible, Interoperable and Reusable data principles |

14 318

16 319 **Declarations**19 320 **Ethics approval and consent to participate**

21 321 All principal investigators provided written confirmation that all participants included in the original trials had  
22 322 given informed consent.

26 323 **Consent for publication**

28 324 Not applicable

31 325 **Availability of data and material**

33 326 Following the ICMJE's data sharing statement policy, de-identified individual participant data will be made  
34 327 available at the end of the research project, including the study protocol, beginning 9 months and ending 36  
35 328 months following article publication. The data will be shared with investigators whose proposed use of the data  
36 329 has been approved by a review committee to be identified for this purpose. Proposals may be submitted up to  
37 330 36 months following article publication. After 36 months the data will be available in our University's data  
38 331 warehouse without investigator support other than deposited metadata.

46 332 **Competing interests**

48 333 The authors declare that they have no competing interest

51 334 **Funding**

52 335 Junior Research project (2018) grant provided by the Radboud Institute for Health Sciences, Radboud  
53 336 University Medical Center, Nijmegen, The Netherlands.

58 337 **Authors' contributions**

1  
2  
3 338 JR, GH, and MR conceived the idea for the review, with inputs from HØ, MR, ER, KH, VG, RP, and ME. SW, MR,  
4  
5 339 JR and GH designed and drafted the protocol. All authors (SW, MR, JR, HØ, MR, ER, KH, VG, RP, ME, and GH)  
6  
7 340 contributed to subsequent revisions and approved the protocol prior to its submission. GH is the guarantor.  
8  
9

#### 10 341 **Acknowledgements**

11  
12 342 None  
13  
14 343

#### 16 344 **References**

- 17  
18  
19 345 1. Abrams GD, Frank RM, Gupta AK, Harris JD, McCormick FM, Cole BJ. Trends in meniscus repair and  
20  
21 346 meniscectomy in the United States, 2005-2011. *Am. J. Sports Med.* 2013;41(10):2333–9.  
22  
23 347 2. Cullen KA, Hall MJ, Golosinskiy A. Ambulatory surgery in the United States, 2006. *Natl. Health Stat.*  
24  
25 348 *Report.* 2009;(11):1–25.  
26  
27 349 3. Roos E, Lohmander S. [Young patients--old knees. Knee problems in the middle age often  
28  
29 350 osteoarthritis]. *Lakartidningen.* 2009;106(24–25):1645–8.  
30  
31 351 4. Buchbinder R, Harris IA, Sprowson A. Management of degenerative meniscal tears and the role of  
32  
33 352 surgery. *Br. J. Sports Med.* 2016;50(22):1413–6.  
34  
35 353 5. Englund M, Roemer FW, Hayashi D, Crema MD, Guermazi A. Meniscus pathology, osteoarthritis and the  
36  
37 354 treatment controversy. *Nat. Rev. Rheumatol.* 2012;8(7):412–9.  
38  
39 355 6. Khan M, Evaniew N, Bedi A, Ayeni OR, Bhandari M. Arthroscopic surgery for degenerative tears of the  
40  
41 356 meniscus: A systematic review and meta-analysis. *Cmaj.* 2014;186(14):1057–64.  
42  
43 357 7. Thorlund JB, Juhl CB, Roos EM, Lohmander LS. Arthroscopic surgery for degenerative knee: Systematic  
44  
45 358 review and meta-analysis of benefits and harms. *Br. J. Sports Med.* 2015;49(19):1229–35.  
46  
47 359 8. Englund M. Bout of the corner men and not the boxers? Contextual effects flex their muscles. *Ann*  
48  
49 360 *Rheum Dis Mon.* 2018;77(2).  
50  
51 361 9. Abram SGF, Judge A, Beard DJ, Price AJ. Adverse outcomes after arthroscopic partial meniscectomy: a  
52  
53 362 study of 700 000 procedures in the national Hospital Episode Statistics database for England. *Lancet.*  
54  
55 363 2018;392(10160):2194–202.  
56  
57 364 10. Hawker G, Guan J, Judge A, Dieppe P. Knee arthroscopy in England and Ontario: Patterns of use,  
58  
59 365 changes over time, and relationship to total knee replacement. *J. Bone Jt. Surg. - Ser. A.*

- 1  
2  
3 366 2008;90(11):2337–45.  
4  
5 367 11. Roemer FW, Kwok CK, Hannon MJ, Hunter DJ, Eckstein F, Grago J, et al. Partial meniscectomy is  
6  
7 368 associated with increased risk of incident radiographic osteoarthritis and worsening cartilage damage in  
8  
9 369 the following year. *Eur. Radiol.* 2017;27(1):404–13.  
10  
11 370 12. Rongen JJ, Rovers MM, van Tienen TG, Buma P, Hannink G. Increased risk for knee replacement surgery  
12  
13 371 after arthroscopic surgery for degenerative meniscal tears: a multi-center longitudinal observational  
14  
15 372 study using data from the osteoarthritis initiative. *Osteoarthr. Cartil.* 2017;25(1):23–9.  
16  
17 373 13. Rongen JJ, van Tienen TG, Buma P, Hannink G. Meniscus surgery is still widely performed in the  
18  
19 374 treatment of degenerative meniscus tears in The Netherlands. *Knee Surgery, Sport. Traumatol.*  
20  
21 375 *Arthrosc.* 2018;26(4):1123–9.  
22  
23 376 14. Thorlund JB, Hare KB, Lohmander LS. Large increase in arthroscopic meniscus surgery in the middle-  
24  
25 377 aged and older population in Denmark from 2000 to 2011. *Acta Orthop.* 2014;85(3):287–92.  
26  
27 378 15. Lazic S, Boughton O, Hing C, Bernard J. Arthroscopic washout of the knee: A procedure in decline. *Knee.*  
28  
29 379 2014;21(2):631–4.  
30  
31 380 16. Mattila VM, Sihvonen R, Paloneva J, Felländer-Tsai L. Changes in rates of arthroscopy due to  
32  
33 381 degenerative knee disease and traumatic meniscal tears in Finland and Sweden. *Acta Orthop.*  
34  
35 382 2016;87(1):5–11.  
36  
37 383 17. Kim S, Bosque J, Meehan JP, Jamali A, Marder R. Increase in outpatient knee arthroscopy in the United  
38  
39 384 States: A comparison of national surveys of ambulatory surgery, 1996 and 2006. *J. Bone Jt. Surg. - Ser.*  
40  
41 385 *A.* 2011;93(11):994–1000.  
42  
43 386 18. Jevsevar DS, Yates AJ, Sanders JO. Arthroscopic Partial Meniscectomy for Degenerative Meniscal Tear.  
44  
45 387 *N. Engl. J. Med.* 2014;370(13):1259–61.  
46  
47 388 19. Elattrache N, Lattermann C, Hannon M, Cole B. New England Journal of Medicine article evaluating the  
48  
49 389 usefulness of Meniscectomy is flawed. *Arthrosc. - J. Arthrosc. Relat. Surg.* 2014;30(5):542–3.  
50  
51 390 20. Lattermann C, Gomoll A, Cole B. Arthroscopic Partial Meniscectomy for Degenerative Meniscal Tear. *N.*  
52  
53 391 *Engl. J. Med.* 2014;370(13):1259–61.  
54  
55 392 21. Krych A, Stuart M LB. Arthroscopic Partial Meniscectomy for Degenerative Meniscal Tear. *N. Engl. J.*  
56  
57 393 *Med.* 2014;370(13):1259–61.  
58  
59 394 22. Lubowitz JH, D’Agostino RB, Provencher MT, Rossi MJ, Brand JC. Can We Trust Knee Meniscus Studies?

- 1  
2  
3 395 One-Way Crossover Confounds Intent-to-Treat Statistical Methods. *Arthroscopy*. 2016;32(11):2187–90.  
4  
5 396 23. McIntyre LF. Making Sure the Media Gets It Right on Orthopaedic Research. *Arthrosc. - J. Arthrosc.*  
6  
7 397 *Relat. Surg.* 2016;32(11):2416–7.  
8  
9 398 24. Katz JN, Wright J, Spindler KP, Mandl LA, Safran-Norton CE, Reinke EK, et al. Predictors and outcomes of  
10  
11 399 crossover to surgery from physical therapy for meniscal tear and osteoarthritis a randomized trial  
12  
13 400 comparing physical therapy and surgery. *J. Bone Jt. Surg. - Am. Vol.* 2016;98(22):1890–6.  
14  
15 401 25. Moher D, Shamseer L, Clarke M, Ghersi D, Liberati A, Petticrew M, et al. Preferred reporting items for  
16  
17 402 systematic review and meta-analysis protocols (PRISMA-P) 2015 statement. *Syst. Rev.* 2015;4:1.  
18  
19 403 26. Tierney JF, Vale C, Riley R, Smith CT, Stewart L, Clarke M, et al. Individual participant data (IPD)  
20  
21 404 metaanalyses of randomised controlled trials: Guidance on their use. *PLoS Med.* 2015;12(7).  
22  
23 405 27. Hua H, Burke DL, Crowther MJ, Ensor J, Tudur Smith C, Riley RD. One-stage individual participant data  
24  
25 406 meta-analysis models: estimation of treatment-covariate interactions must avoid ecological bias by  
26  
27 407 separating out within-trial and across-trial information. *Stat. Med.* 2017;36(5):772–89.  
28  
29 408 28. Sterne JAC, Sutton AJ, Ioannidis JPA, Terrin N, Jones DR, Lau J, et al. Recommendations for examining  
30  
31 409 and interpreting funnel plot asymmetry in meta-analyses of randomised controlled trials. *BMJ.*  
32  
33 410 2011;343(7818):d4002.  
34  
35 411 29. Peters JL, Sutton AJ, Jones DR, Abrams KR, Rushton L. Contour-enhanced meta-analysis funnel plots  
36  
37 412 help distinguish publication bias from other causes of asymmetry. *J. Clin. Epidemiol.* 2008;61(10):991–  
38  
39 413 6.  
40  
41 414 30. Resche-Rigon M, White IR. Multiple imputation by chained equations for systematically and  
42  
43 415 sporadically missing multilevel data. *Stat. Methods Med. Res.* 2018;27(6):1634–49.  
44  
45 416 31. Jolani S, Debray TPA, Koffijberg H, van Buuren S, Moons KGM. Imputation of systematically missing  
46  
47 417 predictors in an individual participant data meta-analysis: A generalized approach using MICE. *Stat.*  
48  
49 418 *Med.* 2015;34(11):1841–63.  
50  
51 419 32. Burgess S, White IR, Resche-Rigon M, Wood AM. Combining multiple imputation and meta-analysis  
52  
53 420 with individual participant data. *Stat. Med.* 2013;32(26):4499–514.  
54  
55 421 33. Debray TPA, Moons KGM, van Valkenhoef G, Efthimiou O, Hummel N, Groenwold RHH, et al. Get real in  
56  
57 422 individual participant data (IPD) meta-analysis: A review of the methodology. *Res. Synth. Methods.*  
58  
59 423 2015;6(4):293–309.  
60

- 1  
2  
3 424 34. Rongen JJ, Hannink G. Comparison of registered and published primary outcomes in randomized  
4  
5 425 controlled trials of orthopaedic surgical interventions. *J. Bone Jt. Surg. - Am. Vol.* 2016;98(5):403–9.  
6  
7 426 35. Burke DL, Ensor J, Riley RD. Meta-analysis using individual participant data: one-stage and two-stage  
8  
9 427 approaches, and why they may differ. *Stat. Med.* 2017;36(5):855–75.  
10  
11 428 36. Knapp G, Hartung J. Improved tests for a random effects meta-regression with a single covariate. *Stat.*  
12  
13 429 *Med.* 2003;22(17):2693–710.  
14  
15 430 37. Turner RM, Omar RZ, Yang M, Goldstein H, Thompson SG. A multilevel model framework for meta-  
16  
17 431 analysis of clinical trials with binary outcomes. *Stat. Med.* 2000;19(24):3417–32.  
18  
19 432 38. Higgins JPT, Whitehead A, Turner RM, Omar RZ, Thompson SG. Meta-analysis of continuous outcome  
20  
21 433 data from individual patients. *Stat. Med.* 2001;20(15):2219–41.  
22  
23 434 39. Int'Hout J, Ioannidis JPA, Rovers MM, Goeman JJ. Plea for routinely presenting prediction intervals in  
24  
25 435 meta-analysis. *BMJ Open.* 2016;6(7):e010247.  
26  
27 436 40. Stewart GB, Altman DG, Askie LM, Duley L, Simmonds MC, Stewart LA. Statistical Analysis of Individual  
28  
29 437 Participant Data Meta-Analyses: A Comparison of Methods and Recommendations for Practice. *PLoS*  
30  
31 438 *One.* 2012;7(10):e46042.  
32  
33 439 41. Steyerberg EW. *Clinical Prediction Models: A Practical Approach to Development, Validation, and*  
34  
35 440 *Updating.* New York, NY: Springer New York; 2009.  
36  
37 441 42. Steyerberg EW, Uno H, Ioannidis JPA, van Calster B, Ukaegbu C, Dhingra T, et al. Poor performance of  
38  
39 442 clinical prediction models: the harm of commonly applied methods. *J. Clin. Epidemiol.* 2018;98:133–43.  
40  
41 443 43. Biedert RM. Treatment of intrasubstance meniscal lesions: a randomized prospective study of four  
42  
43 444 different methods. *Knee Surgery, Sport. Traumatol. Arthrosc.* 2000;8(2):104–8.  
44  
45 445 44. Herrlin S, Hållander M, Wange P, Weidenhielm L, Werner S. Arthroscopic or conservative treatment of  
46  
47 446 degenerative medial meniscal tears: A prospective randomised trial. *Knee Surgery, Sport. Traumatol.*  
48  
49 447 *Arthrosc.* 2007;15(4):393–401.  
50  
51 448 45. Katz JN, Brophy RH, Chaisson CE, de Chaves L, Cole BJ, Dahm DL, et al. Surgery versus Physical Therapy  
52  
53 449 for a Meniscal Tear and Osteoarthritis. *N. Engl. J. Med.* 2013;368(18):1675–84.  
54  
55 450 46. Kise NJ, Risberg MA, Stensrud S, Ranstam J, Engebretsen L, Roos EM. Exercise therapy versus  
56  
57 451 arthroscopic partial meniscectomy for degenerative meniscal tear in middle aged patients: Randomised  
58  
59 452 controlled trial with two year follow-up. *BMJ.* 2016;354.



- 1  
2  
3 453 47. Østerås H, Østerås B, Torstensen TA. Medical exercise therapy, and not arthroscopic surgery, resulted  
4  
5 454 in decreased depression and anxiety in patients with degenerative meniscus injury. *J. Bodyw. Mov.*  
6  
7 455 *Ther.* 2012;16(4):456–63.  
8  
9 456 48. Sihvonen R, Paavola M, Malmivaara A, Itälä A, Joukainen A, Nurmi H, et al. Arthroscopic Partial  
10  
11 457 Meniscectomy versus Sham Surgery for a Degenerative Meniscal Tear. *N. Engl. J. Med.*  
12  
13 458 2013;369(26):2515–24.  
14  
15 459 49. Vermesan D, Prejbeanu R, Laitin S, Damian G, Deleanu B, Abbinante A, et al. Arthroscopic debridement  
16  
17 460 compared to intra-articular steroids in treating degenerative medial meniscal tears. *Eur. Rev. Med.*  
18  
19 461 *Pharmacol. Sci.* 2013;17(23):3192–6.  
20  
21 462 50. Yim JH, Seon JK, Song EK, Choi JI, Kim MC, Lee KB, et al. A comparative study of meniscectomy and  
22  
23 463 nonoperative treatment for degenerative horizontal tears of the medial meniscus. *Am. J. Sports Med.*  
24  
25 464 2013;41(7):1565–70.  
26  
27 465 51. Graaf VA van de, Noorduyn JCA, Willigenburg NW, Butter IK, Gast A de, Mol BW, et al. Effect of Early  
28  
29 466 Surgery vs Physical Therapy on Knee Function Among Patients With Nonobstructive Meniscal Tears:  
30  
31 467 The ESCAPE Randomized Clinical Trial. *Jama.* 2018;320(13):1328–37.  
32  
33 468 52. Roos EM, Hare KB, Nielsen SM, Christensen R, Lohmander LS. Better outcome from arthroscopic partial  
34  
35 469 meniscectomy than skin incisions only? A sham-controlled randomised trial in patients aged 35-55  
36  
37 470 years with knee pain and an MRI-verified meniscal tear. *BMJ Open.* 2018;8(2):e019461.  
38  
39 471 53. Gauffin H, Tagesson S, Meunier A, Magnusson H, Kvist J. Knee arthroscopic surgery is beneficial to  
40  
41 472 middle-aged patients with meniscal symptoms: A prospective, randomised, single-blinded study.  
42  
43 473 *Osteoarthr. Cartil.* 2014;22(11):1808–16.  
44  
45 474 54. Hellerman C. You may not be better off after knee surgery [Internet]. CNN. 2013 [cited 2018 Oct 31].  
46  
47 475 Available from: <https://edition.cnn.com/2013/12/26/health/knee-surgery-study/index.html>  
48  
49 476 55. Wilkinson MD, Dumontier M, Aalbersberg IJ, Appleton G, Axton M, Baak A, et al. The FAIR Guiding  
50  
51 477 Principles for scientific data management and stewardship. *Sci. Data.* 2016;3:160018.  
52  
53 478 56. Debray T, Jolani S, Schierenberg A, Moons K. Dealing with missing data in an individual participant data  
54  
55 479 meta-analysis: one--stage versus two--stage methods | Colloquium Abstracts. *Abstr. 24th Cochrane*  
56  
57 480 *Colloq.* 2016;23-27 Oct.  
58  
59 481 57. Friberger Pajalic K, Turkiewicz A, Englund M. Update on the risks of complications after knee

1  
2  
3 482 arthroscopy. BMC Musculoskelet. Disord. 2018;19(1):179.  
4  
5

6 483 **Additional files:**

7  
8 484 File name: Additional file 1  
9

10 485 File format: Additional\_file\_1.doc  
11

12 486 Title: Systematic search of literature to detect randomized controlled trials that compared (partial) arthroscopic  
13  
14 487 meniscectomy to sham surgery or non-surgical techniques.  
15

16 488 Description: The systematic search strategy in Medline (PubMed), Embase, CENTRAL, CINAHL, Web of Science  
17  
18 489 and WHO trial register to detect randomized controlled trials that compared (partial) arthroscopic  
19  
20 490 meniscectomy to sham surgery or non-surgical techniques.  
21

22 491

23  
24 492 File name: Additional file 2  
25

26 493 File format: Additional\_file\_2.doc  
27

28 494 Title: Potential clinically relevant baseline characteristics  
29

30 495 Description: A list of all identified potential clinically relevant baseline characteristics divided into 5 categories:  
31

32 496 General characteristics, patient history, meniscus information, symptoms and quality of life.  
33  
34  
35  
36  
37  
38  
39  
40  
41  
42  
43  
44  
45  
46  
47  
48  
49  
50  
51  
52  
53  
54  
55  
56  
57  
58  
59  
60

**Additional file 1: Systematic search of literature to detect randomized controlled trials that compared (partial) arthroscopic meniscectomy to sham surgery or non-surgical techniques.**

|    | <b>Medline (Pubmed)</b>                         | <b>Embase</b>                                    | <b>Cochrane Database of registered trial (CENTRAL)</b>                                                    | <b>Cumulative Index to Nursing and Allied Health Literature (CINAHL)</b>                                    | <b>Web of Science (Thomson Reuter)</b> | <b>WHO trial register</b>     |
|----|-------------------------------------------------|--------------------------------------------------|-----------------------------------------------------------------------------------------------------------|-------------------------------------------------------------------------------------------------------------|----------------------------------------|-------------------------------|
| 1  | "Menisci, Tibial/surgery"[Mesh]                 | Arthroscopic meniscectomy.ti,ab,kw.              | MeSH descriptor: [Menisci, Tibial] explode all trees and with qualifier(s): [Injuries – IN, Surgery – SU] | TI "Degenerative meniscal tear" OR AB "Degenerative meniscal tear"                                          | arthroscopy AND knee                   | "Menisc*" in the title        |
| 2  | "Menisci, Tibial/injuries"[Mesh]                | Arthroscopic debridement.ti,ab,kw.               | MeSH descriptor: [Arthroscopy] explode all trees                                                          | MH "Arthroscopy" OR "arthroscopy"                                                                           | arthroscopic meniscectomy              | "Menisc*" in the condition    |
| 3  | "Degenerative meniscal tear"[TIAB]              | Arthroscopic lavage.ti,ab,kw.                    | MeSH descriptor: [Knee] explode all trees                                                                 | MH "knee" OR AB "knee" OR TI "knee"                                                                         | arthroscopic debridement               | "Menisc*" in the intervention |
| 4  | "Arthroscopic lavage"[TIAB]                     | Degenerative meniscal tear.ti,ab,kw.             | 2 and 3                                                                                                   | 2 AND 3                                                                                                     | arthroscopic lavage                    | 1 OR 2 OR 3                   |
| 5  | "Arthroscopic debridement"[TIAB]                | knee meniscus/ or meniscus tibial.mp             | Degenerative meniscal tear:ti,ab,kw (Word variations have been searched)                                  | MH "Meniscal Injuries" OR AB "meniscal Injuries" OR TI "meniscal Injuries"                                  | degenerative meniscal tear             |                               |
| 6  | "arthroscopic meniscectomy"[TIAB]               | exp knee arthroscopy/                            | Arthroscopic lavage:ti,ab,kw (Word variations have been searched)                                         | MH "Menisci, Tibial" OR AB "tibial meniscus" OR TI "tibial meniscus"                                        | menisci, tibial AND surgery            |                               |
| 7  | "Arthroscopy"[TIAB] AND "Knee"[TIAB]            | 1 or 2 or 3 or 4 or 5 or 6                       | Arthroscopic debridement:ti,ab,kw (Word variations have been searched)                                    | TI "Arthroscopic lavage" OR AB "Arthroscopic lavage"                                                        | menisci, tibial AND injury             |                               |
| 8  | 1 OR 2 OR 3 OR 4 OR 5 OR 6 OR 7                 | randomized controlled trial/                     | arthroscopic meniscectomy:ti,ab,kw (Word variations have been searched)                                   | TI "Arthroscopic debridement" OR AB "Arthroscopic debridement"                                              | 1 OR 2 OR 3 OR 4 OR 5 OR 6 OR 7        |                               |
| 9  | "Randomized" [TIAB]                             | randomized.ti,ab,kw.                             | 1 or 4 or 5 or 6 or 7 or 8                                                                                | TI "arthroscopic meniscectomy" OR AB "arthroscopic meniscectomy"                                            | randomized                             |                               |
| 10 | "Randomized controlled trial"[Publication Type] | randomized.ti,ab,kw.                             |                                                                                                           | 1 OR 4 OR 5 OR 6 OR 7 OR 8 OR 9                                                                             | randomised                             |                               |
| 11 | "randomized controlled trials as topic"[Mesh]   | random allocation.mp.                            |                                                                                                           | TI "Randomized" OR AB "Randomized"                                                                          | random allocation                      |                               |
| 12 | "Random allocation"[Mesh]                       | randomized.mp.                                   |                                                                                                           | MH "Randomized Controlled Trials" OR TI "Randomized Controlled Trials" OR AB "Randomized Controlled Trials" | control group                          |                               |
| 13 | "Control group"[TIAB]                           | "randomized controlled trial (topic)"/           |                                                                                                           | MH "Random Assignment" OR AB "Random Assignment" OR TI "Random Assignment"                                  | cross-over stud*                       |                               |
| 14 | "Control groups"[Mesh]                          | control group.mp.                                |                                                                                                           | AB "Random Allocation" OR TI "Random Allocation"                                                            | randomized controlled trial            |                               |
| 15 | "Cross-over studies"[TIAB]                      | control group/                                   |                                                                                                           | (MH "Control Group") OR (AB "Control Group") OR (TI "Control Group")                                        | 9 OR 10 OR 11 OR 12 OR 13 OR 14        |                               |
| 16 | "Cross-over study"[TIAB]                        | crossover procedure/                             |                                                                                                           | (MH "Crossover Design") AND (AB "Crossover Design") AND (TI "Crossover Design")                             | 8 AND 15                               |                               |
| 17 | 9 OR 10 OR 11 OR 12 OR 13 OR 14 OR 15 OR 16     | 8 or 9 or 10 or 11 or 12 or 13 or 14 or 15 or 16 |                                                                                                           | 11 OR 12 OR 13 OR 14 OR 15 OR 16                                                                            |                                        |                               |
| 18 | 8 AND 17                                        | 7 and 17                                         |                                                                                                           | 10 AND 17                                                                                                   |                                        |                               |

## Additional file 2. Potential clinically relevant baseline characteristics

| Category                | Characteristics                                              |
|-------------------------|--------------------------------------------------------------|
| General characteristics | Age                                                          |
|                         | Gender                                                       |
|                         | Weight, height (BMI)                                         |
| Patient history         | History of medication for knee symptoms                      |
|                         | History of serious knee injury                               |
|                         | History of knee surgery                                      |
|                         | Family history of knee OA / of knee replacement surgery      |
|                         | History of osteoarthritis                                    |
| Meniscus information    | Medial/lateral meniscus                                      |
|                         | Radiographic severity of knee OA                             |
|                         | MRI meniscus extrusion                                       |
|                         | MRI meniscus tear type / degeneration                        |
|                         | Onset of symptoms (e.g. gradual, after event, suddenly)      |
|                         | Duration of symptoms                                         |
|                         | Grading of work and sporting activities                      |
| Symptoms                | Signs and symptoms during specific physical examination test |
|                         | Knee locking symptoms / mechanical symptoms                  |
|                         | Knee related daily function                                  |
|                         | Knee pain                                                    |
|                         | Knee stiffness                                               |
|                         | Knee related quality of life                                 |
|                         | Knee swelling                                                |
| Quality of life         | Generic quality of life (EQ-5D / SF36)                       |
|                         | Mental health score                                          |

## PRISMA-P 2015 Checklist

This checklist has been adapted for use with systematic review protocol submissions to BioMed Central journals from Table 3 in Moher D et al: Preferred reporting items for systematic review and meta-analysis protocols (PRISMA-P) 2015 statement. *Systematic Reviews* 2015 4:1

An Editorial from the Editors-in-Chief of *Systematic Reviews* details why this checklist was adapted - Moher D, Stewart L & Shekelle P: Implementing PRISMA-P: recommendations for prospective authors. *Systematic Reviews* 2016 5:15

| Section/topic                     | #  | Checklist item                                                                                                                                                                                  | Information reported                |                                     | Line number(s) |
|-----------------------------------|----|-------------------------------------------------------------------------------------------------------------------------------------------------------------------------------------------------|-------------------------------------|-------------------------------------|----------------|
|                                   |    |                                                                                                                                                                                                 | Yes                                 | No                                  |                |
| <b>ADMINISTRATIVE INFORMATION</b> |    |                                                                                                                                                                                                 |                                     |                                     |                |
| <b>Title</b>                      |    |                                                                                                                                                                                                 |                                     |                                     |                |
| Identification                    | 1a | Identify the report as a protocol of a systematic review                                                                                                                                        | <input checked="" type="checkbox"/> | <input type="checkbox"/>            | 1-2            |
| Update                            | 1b | If the protocol is for an update of a previous systematic review, identify as such                                                                                                              | <input type="checkbox"/>            | <input type="checkbox"/>            | NA             |
| <b>Registration</b>               | 2  | If registered, provide the name of the registry (e.g., PROSPERO) and registration number in the Abstract                                                                                        | <input checked="" type="checkbox"/> | <input type="checkbox"/>            | 65, 99         |
| <b>Authors</b>                    |    |                                                                                                                                                                                                 |                                     |                                     |                |
| Contact                           | 3a | Provide name, institutional affiliation, and e-mail address of all protocol authors; provide physical mailing address of corresponding author                                                   | <input checked="" type="checkbox"/> | <input type="checkbox"/>            | 6 - 36         |
| Contributions                     | 3b | Describe contributions of protocol authors and identify the guarantor of the review                                                                                                             | <input checked="" type="checkbox"/> | <input type="checkbox"/>            | 318 - 320      |
| <b>Amendments</b>                 | 4  | If the protocol represents an amendment of a previously completed or published protocol, identify as such and list changes; otherwise, state plan for documenting important protocol amendments | <input type="checkbox"/>            | <input type="checkbox"/>            | NA             |
| <b>Support</b>                    |    |                                                                                                                                                                                                 |                                     |                                     |                |
| Sources                           | 5a | Indicate sources of financial or other support for the review                                                                                                                                   | <input checked="" type="checkbox"/> | <input type="checkbox"/>            | 315-317        |
| Sponsor                           | 5b | Provide name for the review funder and/or sponsor                                                                                                                                               | <input checked="" type="checkbox"/> | <input type="checkbox"/>            | 315-317        |
| Role of sponsor/funder            | 5c | Describe roles of funder(s), sponsor(s), and/or institution(s), if any, in developing the protocol                                                                                              | <input type="checkbox"/>            | <input checked="" type="checkbox"/> |                |
| <b>INTRODUCTION</b>               |    |                                                                                                                                                                                                 |                                     |                                     |                |
| <b>Rationale</b>                  | 6  | Describe the rationale for the review in the context of what is already known                                                                                                                   | <input checked="" type="checkbox"/> | <input type="checkbox"/>            | 75-93          |

| Section/topic                             | #   | Checklist item                                                                                                                                                                                                                              | Information reported                |                                     | Line number(s)              |
|-------------------------------------------|-----|---------------------------------------------------------------------------------------------------------------------------------------------------------------------------------------------------------------------------------------------|-------------------------------------|-------------------------------------|-----------------------------|
|                                           |     |                                                                                                                                                                                                                                             | Yes                                 | No                                  |                             |
| <b>Objectives</b>                         | 7   | Provide an explicit statement of the question(s) the review will address with reference to participants, interventions, comparators, and outcomes (PICO)                                                                                    | <input checked="" type="checkbox"/> | <input type="checkbox"/>            | 94-95                       |
| <b>METHODS</b>                            |     |                                                                                                                                                                                                                                             |                                     |                                     |                             |
| <b>Eligibility criteria</b>               | 8   | Specify the study characteristics (e.g., PICO, study design, setting, time frame) and report characteristics (e.g., years considered, language, publication status) to be used as criteria for eligibility for the review                   | <input checked="" type="checkbox"/> | <input type="checkbox"/>            | 104-113                     |
| <b>Information sources</b>                | 9   | Describe all intended information sources (e.g., electronic databases, contact with study authors, trial registers, or other grey literature sources) with planned dates of coverage                                                        | <input checked="" type="checkbox"/> | <input type="checkbox"/>            | 114-130                     |
| <b>Search strategy</b>                    | 10  | Present draft of search strategy to be used for at least one electronic database, including planned limits, such that it could be repeated                                                                                                  | <input checked="" type="checkbox"/> | <input type="checkbox"/>            | Additional file 1           |
| <b>STUDY RECORDS</b>                      |     |                                                                                                                                                                                                                                             |                                     |                                     |                             |
| Data management                           | 11a | Describe the mechanism(s) that will be used to manage records and data throughout the review                                                                                                                                                | <input checked="" type="checkbox"/> | <input type="checkbox"/>            | 144-155                     |
| Selection process                         | 11b | State the process that will be used for selecting studies (e.g., two independent reviewers) through each phase of the review (i.e., screening, eligibility, and inclusion in meta-analysis)                                                 | <input checked="" type="checkbox"/> | <input type="checkbox"/>            | 130-142                     |
| Data collection process                   | 11c | Describe planned method of extracting data from reports (e.g., piloting forms, done independently, in duplicate), any processes for obtaining and confirming data from investigators                                                        | <input checked="" type="checkbox"/> | <input type="checkbox"/>            | 130-142                     |
| <b>Data items</b>                         | 12  | List and define all variables for which data will be sought (e.g., PICO items, funding sources), any pre-planned data assumptions and simplifications                                                                                       | <input checked="" type="checkbox"/> | <input type="checkbox"/>            | 175-195 + Additional file 2 |
| <b>Outcomes and prioritization</b>        | 13  | List and define all outcomes for which data will be sought, including prioritization of main and additional outcomes, with rationale                                                                                                        | <input checked="" type="checkbox"/> | <input type="checkbox"/>            | 175-195 + Additional file 2 |
| <b>Risk of bias in individual studies</b> | 14  | Describe anticipated methods for assessing risk of bias of individual studies, including whether this will be done at the outcome or study level, or both; state how this information will be used in data synthesis                        | <input checked="" type="checkbox"/> | <input type="checkbox"/>            | 143-174                     |
| <b>DATA</b>                               |     |                                                                                                                                                                                                                                             |                                     |                                     |                             |
| <b>Synthesis</b>                          | 15a | Describe criteria under which study data will be quantitatively synthesized                                                                                                                                                                 | <input type="checkbox"/>            | <input checked="" type="checkbox"/> |                             |
|                                           | 15b | If data are appropriate for quantitative synthesis, describe planned summary measures, methods of handling data, and methods of combining data from studies, including any planned exploration of consistency (e.g., $I^2$ , Kendall's tau) | <input checked="" type="checkbox"/> | <input type="checkbox"/>            | 196-240                     |

1  
2  
3  
4  
5  
6  
7  
8  
9  
10  
11  
12  
13  
14  
15  
16  
17  
18  
19  
20  
21  
22  
23  
24  
25  
26  
27  
28  
29  
30  
31  
32  
33  
34  
35  
36  
37  
38  
39  
40  
41  
42  
43  
44  
45  
46

| Section/topic                            | #   | Checklist item                                                                                                              | Information reported                |                                     | Line number(s) |
|------------------------------------------|-----|-----------------------------------------------------------------------------------------------------------------------------|-------------------------------------|-------------------------------------|----------------|
|                                          |     |                                                                                                                             | Yes                                 | No                                  |                |
|                                          | 15c | Describe any proposed additional analyses (e.g., sensitivity or subgroup analyses, meta-regression)                         | <input checked="" type="checkbox"/> | <input type="checkbox"/>            | 241-248        |
|                                          | 15d | If quantitative synthesis is not appropriate, describe the type of summary planned                                          | <input type="checkbox"/>            | <input checked="" type="checkbox"/> |                |
| <b>Meta-bias(es)</b>                     | 16  | Specify any planned assessment of meta-bias(es) (e.g., publication bias across studies, selective reporting within studies) | <input checked="" type="checkbox"/> | <input type="checkbox"/>            | 156-165        |
| <b>Confidence in cumulative evidence</b> | 17  | Describe how the strength of the body of evidence will be assessed (e.g., GRADE)                                            | <input type="checkbox"/>            | <input checked="" type="checkbox"/> |                |

# BMJ Open

## Arthroscopic meniscectomy versus non-surgical or sham treatment in patients with MRI confirmed degenerative meniscus lesions: a protocol for an individual participant data meta-analysis

|                                 |                                                                                                                                                                                                                                                                                                                                                                                                                                                                                                                                                                                                                                                                                                                                                                                                                                                                                                                                                                                               |
|---------------------------------|-----------------------------------------------------------------------------------------------------------------------------------------------------------------------------------------------------------------------------------------------------------------------------------------------------------------------------------------------------------------------------------------------------------------------------------------------------------------------------------------------------------------------------------------------------------------------------------------------------------------------------------------------------------------------------------------------------------------------------------------------------------------------------------------------------------------------------------------------------------------------------------------------------------------------------------------------------------------------------------------------|
| Journal:                        | <i>BMJ Open</i>                                                                                                                                                                                                                                                                                                                                                                                                                                                                                                                                                                                                                                                                                                                                                                                                                                                                                                                                                                               |
| Manuscript ID                   | bmjopen-2019-031864.R2                                                                                                                                                                                                                                                                                                                                                                                                                                                                                                                                                                                                                                                                                                                                                                                                                                                                                                                                                                        |
| Article Type:                   | Protocol                                                                                                                                                                                                                                                                                                                                                                                                                                                                                                                                                                                                                                                                                                                                                                                                                                                                                                                                                                                      |
| Date Submitted by the Author:   | 16-Dec-2019                                                                                                                                                                                                                                                                                                                                                                                                                                                                                                                                                                                                                                                                                                                                                                                                                                                                                                                                                                                   |
| Complete List of Authors:       | Wijn, Stan; Radboudumc, Department of Operating Rooms Rovers, Maroeska; The Radboud University, Nijmegen Medical Centre, Rongen, Jan; Radboudumc, Operating rooms Østerås, Håvard; Norges Teknisk-Naturvitenskapelige Universitet Fakultet for Medisin og Helsevitenskap, Neuromedicine and Movement Science<br>Risberg, May Arna; Norwegian School of Sport Sciences, Department of Sports Medicine; Oslo universitetssykehus Ullevål, Division of Orthopedic Surgery, Department of Reserach<br>Roos, Ewa; Syddansk Universitet Det Sundhedsvidenskabelige Fakultet, Sports Science and Clinical Biomechanics<br>Hare, Kristoffer; Region Zealand, Department of Orthopedics, Slagelse Medical Hospital<br>van de Graaf, VA; Spaarne Gasthuis, Department of Orthopaedic Surgery, Joint Research<br>Poolman, Rudolf; Onze Lieve Vrouwe Gasthuis, Orthopaedic Surgery<br>Englund, Martin; Lund University, Dept of Orthopedics<br>Hannink, Gerjon; Radboudumc, Department of Operating Rooms |
| <b>Primary Subject Heading</b>: | Surgery                                                                                                                                                                                                                                                                                                                                                                                                                                                                                                                                                                                                                                                                                                                                                                                                                                                                                                                                                                                       |
| Secondary Subject Heading:      | Sports and exercise medicine                                                                                                                                                                                                                                                                                                                                                                                                                                                                                                                                                                                                                                                                                                                                                                                                                                                                                                                                                                  |
| Keywords:                       | Arthroscopic surgery, Meniscectomy, Osteoarthritis, Individual Participant Data Meta-Analysis, IPDMA                                                                                                                                                                                                                                                                                                                                                                                                                                                                                                                                                                                                                                                                                                                                                                                                                                                                                          |
|                                 |                                                                                                                                                                                                                                                                                                                                                                                                                                                                                                                                                                                                                                                                                                                                                                                                                                                                                                                                                                                               |

SCHOLARONE™  
Manuscripts





I, the Submitting Author has the right to grant and does grant on behalf of all authors of the Work (as defined in the below author licence), an exclusive licence and/or a non-exclusive licence for contributions from authors who are: i) UK Crown employees; ii) where BMJ has agreed a CC-BY licence shall apply, and/or iii) in accordance with the terms applicable for US Federal Government officers or employees acting as part of their official duties; on a worldwide, perpetual, irrevocable, royalty-free basis to BMJ Publishing Group Ltd ("BMJ") its licensees and where the relevant Journal is co-owned by BMJ to the co-owners of the Journal, to publish the Work in this journal and any other BMJ products and to exploit all rights, as set out in our [licence](#).

The Submitting Author accepts and understands that any supply made under these terms is made by BMJ to the Submitting Author unless you are acting as an employee on behalf of your employer or a postgraduate student of an affiliated institution which is paying any applicable article publishing charge ("APC") for Open Access articles. Where the Submitting Author wishes to make the Work available on an Open Access basis (and intends to pay the relevant APC), the terms of reuse of such Open Access shall be governed by a Creative Commons licence – details of these licences and which [Creative Commons](#) licence will apply to this Work are set out in our licence referred to above.

Other than as permitted in any relevant BMJ Author's Self Archiving Policies, I confirm this Work has not been accepted for publication elsewhere, is not being considered for publication elsewhere and does not duplicate material already published. I confirm all authors consent to publication of this Work and authorise the granting of this licence.

1  
2  
3  
4 1 **Arthroscopic meniscectomy versus non-surgical or sham treatment in patients with MRI confirmed**  
5  
6 2 **degenerative meniscus lesions: a protocol for an individual participant data meta-analysis**  
7

8 3 Stan R.W. Wijn<sup>1</sup>, Maroeska M. Rovers<sup>1</sup>, Jan J. Rongen<sup>1</sup>, Håvard Østerås<sup>2</sup>, May A. Risberg<sup>3</sup>, Ewa M. Roos<sup>4</sup>,  
9  
10 4 Kristoffer B. Hare<sup>5</sup>, Victor A. van de Graaf<sup>6</sup>, Rudolf W. Poolman<sup>6</sup>, Martin Englund<sup>7</sup>, Gerjon Hannink<sup>1</sup>  
11  
12 5

13  
14 6 <sup>1</sup> Radboud University Medical Center, Radboud Institute for Health Sciences, Department of Operating Rooms, Nijmegen, the Netherlands

15 7 <sup>2</sup> Norwegian University of Science and Technology, Faculty of Medicine and Health Sciences, Department of Neuromedicine and Movement  
16  
17 8 Science, Trondheim, Norway

18  
19 9 <sup>3</sup> Norwegian School of Sport Sciences, Department of Sport Medicine, and Division of Orthopedic Surgery, Oslo University Hospital, Oslo,  
20  
21 10 Norway

22 11 <sup>4</sup> University of Southern Denmark, Musculoskeletal Function and Physiotherapy and Center for Muscle and Joint Health, Department of  
23  
24 12 Sports and Clinical Biomechanics, Odense, Denmark

25 13 <sup>5</sup> University of Southern Denmark, Institute of Sports Science and Clinical Biomechanics, Department of Orthopedics, Odense, Denmark

26 14 <sup>6</sup> OLVG, Joint Research, Department of Orthopaedic Surgery, Amsterdam, the Netherlands

27 15 <sup>7</sup> Lund University, Faculty of Medicine, Department of Clinical Sciences Lund, Orthopaedics, Clinical Epidemiology Unit, Lund, Sweden  
28  
29  
30  
31

32 17 Stan R.W. Wijn<sup>1</sup>, Stan.Wijn@radboudumc.nl

33 18 Maroeska M. Rovers<sup>1</sup>, Maroeska.Rovers@radboudumc.nl

34 19 Jan J. Rongen<sup>1</sup>, Jan.Rongen@radboudumc.nl

35 20 Håvard Østerås<sup>2</sup>, Havard.Osteras@ntnu.no

36 21 May A. Risberg<sup>3</sup>, M.a.Risberg@nih.no

37 22 Ewa M. Roos<sup>4</sup>, ERoos@health.sdu.dk

38 23 Kristoffer B. Hare<sup>5</sup>, Kbh@regionsjaelland.dk

39 24 Victor A. van de Graaf<sup>6</sup>, vandeGraaf@gmail.com

40 25 Rudolf W. Poolman<sup>6</sup>, RWP@jointresearch.org

41 26 Martin Englund<sup>7</sup>, Martin.Englund@med.lu.se

42 27 Gerjon Hannink<sup>1</sup>, Gerjon.Hannink@radboudumc.nl  
43  
44  
45  
46  
47  
48

49 29 Physical mailing address of the corresponding author:

50  
51 30 Stan R.W. Wijn

52 31 Radboud university medical center

53 32 715 Department of Operating Rooms

54 33 P.O. Box 9101

55 34 6500 HB Nijmegen

56 35 The Netherlands  
57  
58

59 37 Word count: 3886  
60

1  
2  
3 38 **Abstract**

4  
5 39 **Introduction**

6  
7  
8 40 Arthroscopic partial meniscectomy (APM) after degenerative meniscus tears is one of the most frequently  
9  
10 41 performed surgeries in orthopedics. Although several randomized controlled trials (RCTs) have been published  
11  
12 42 that showed no clear benefit compared to sham treatment or non-surgical treatment, the incidence of APM  
13  
14 43 remains high. The common perception by most orthopedic surgeons is that there are subgroups of patients  
15  
16 44 that *do* need APM to improve, and they argue that each study sample of the existing trials is not representative  
17  
18 45 for the day-to-day patients in the clinic. Therefore, the objective of this individual participant data meta-  
19  
20 46 analysis (IPDMA) is to assess whether there are subgroups of patients with degenerative meniscus lesions who  
21  
22 47 benefit from APM in comparison with non-surgical or sham treatment.

23  
24  
25 48 **Methods and Analysis**

26  
27 49 An existing systematic review will be updated to identify all RCTs worldwide that evaluated APM compared to  
28  
29 50 sham- or non-surgical treatment in patients with knee symptoms and degenerative meniscus tears. Time and  
30  
31 51 effort will be spent in contacting principal investigators of the original trials and encourage them to collaborate  
32  
33 52 in this project by sharing their trial data. All individual participant data will be validated for missing data,  
34  
35 53 internal data consistency, randomization integrity and censoring patterns. After validation, all datasets will be  
36  
37 54 combined and analyzed using a one- and two-staged approach. The most important outcome will be the  
38  
39 55 difference between APM and control groups in knee pain, function and quality of life 2 years after the  
40  
41 56 intervention. Other outcomes of interest will include the difference in adverse events and mental health.

42  
43  
44 57 **Ethics and dissemination**

45  
46 58 All trial data will be anonymized before it is shared with the authors. The data will be encrypted and stored on  
47  
48 59 secure server located in the Netherlands. No major ethical concerns remain. This IPDMA will provide the  
49  
50 60 evidence base to update and tailor diagnostic and treatment protocols as well as (international) guidelines for  
51  
52 61 patients for whom orthopedic surgeons consider APM. The results will be submitted for publication in a peer-  
53  
54 62 reviewed journal.

55  
56  
57 63 **Registration**

58  
59 64 Prospero registration number: CRD42017067240  
60

1  
2  
3 65 **Keywords**  
4

5 66 Arthroscopic surgery; Meniscectomy; Osteoarthritis; Individual Participant Data Meta-Analysis; IPDMA  
6

7 67 **Article Summary**  
8

9 68 **Strengths and limitations of this study**  
10

- 11 69 • To our knowledge, this is the first study that combines the individual participant data of RCTs  
12 performed on APM, maximizing the capability to detect subgroups that may benefit from the surgery.  
13  
14 70  
15  
16 71 • The main advantage of an IPDMA is that no large-scale RCT is required, but instead the power of  
17 existing studies is combined to achieve large patient numbers.  
18 72  
19  
20 73 • Trial data might not be available, not accessible or sharing is not possible due to a stringent informed  
21 consent that only enables the use of the data for the original study. This might limit the amount of  
22 74 trials we can include.  
23  
24 75  
25  
26 76 • We are dependent on the outcomes that have been used in the included studies. These can differ  
27 between studies.  
28 77  
29  
30  
31 78  
32  
33  
34  
35  
36  
37  
38  
39  
40  
41  
42  
43  
44  
45  
46  
47  
48  
49  
50  
51  
52  
53  
54  
55  
56  
57  
58  
59  
60

## 79 **Background**

80 Arthroscopic partial meniscectomy (APM) is a regularly performed surgical procedure intended to treat  
81 symptoms believed to be caused by degenerative meniscus lesions. [1–3] Degenerative lesions are typically  
82 observed in middle-aged and older people, and are caused by chronic degenerative processes. [4,5] Over the  
83 past decade, evidence has accumulated that questions both the rationale for, and the effectiveness of APM for  
84 degenerative meniscus lesions. [6,7] Additionally, concerns have been expressed on the harms associated with  
85 the procedure [7–9] and the potential detrimental effect of the procedure on the progression of osteoarthritis.  
86 [10–12] Still, the number of surgical procedures performed in the treatment of degenerative meniscus lesions  
87 remains high. [13–17]

88 Orthopedic surgeons have expressed concerns about the generalizability of the trial results and point  
89 out that the study samples are not representative of the subjects they select for surgery in their day-to-day  
90 clinical practice.[18–24] The common perception by most surgeons is that there are subgroups of patients that  
91 *do* need the procedure to improve.[8] Hence, applying the mean effects of randomized controlled trials (RCTs)  
92 to individual patients in day-to-day practice runs against the intuitive approach of doctors to use the specific  
93 characteristics of a particular patient to tailor management accordingly. Unfortunately, the identification of  
94 subgroups of patients that may/may not benefit from the procedure has been problematic, as the individual  
95 trials performed so far were too small to perform valid and reliable subgroup analyses.

96 An individual participant data meta-analysis (IPDMA), i.e. a meta-analysis on the original individual  
97 participant data of previously performed trials, has been described as the gold standard of systematic review  
98 and meta-analysis. An IPDMA offers the unique opportunity to recode, and re-analyze all original trial data, and  
99 evaluate the effectiveness of surgical treatment of degenerative meniscus lesions and to identify potential  
100 subgroups more likely to benefit from the intervention. Identifying these subgroups can assist physicians to  
101 make personalized treatment decisions and thereby improving the overall quality of life of patients that are  
102 currently selected for APM.

103 Therefore, the objective of this IPDMA is to assess whether there are subgroups of patients with  
104 degenerative meniscus lesions who benefit from APM in comparison with non-surgical or sham treatment.

105

106

## 107 **Methods**

108 The protocol is reported according to the Preferred Reporting Items for Systematic Reviews and Meta-Analysis  
109 protocols (PRISMA-P) statement and is registered in PROSPERO with registration number: CRD42017067240.

110 [25] The first part of the method section describes a regular systematic review to identify eligible papers and  
111 invite the study authors to collaborate and contribute data. The second part describes the analysis with the  
112 individual participant data.

## 113 **Patient and Public Involvement**

114 Patients and members of the public were not involved in development of the protocol. A panel of patient  
115 representatives will provide detailed input regarding outcomes and the interpretation of the results from this  
116 IPDMA.

## 118 **Part 1: Identifying eligible papers & data collection**

### 119 **Eligibility criteria**

120 This IPDMA will include RCTs that evaluated the effectiveness of (partial) meniscectomy compared to non-  
121 surgical or sham treatments in persons with MRI-verified degenerative meniscus lesions. Degenerative  
122 meniscus lesions are typically observed in middle-aged and older people and may be the result of early  
123 degenerative knee disease. Persistent knee symptoms may encompass knee pain, limitation of function, and  
124 mechanical symptoms such as the sensation of catching or locking of the knee. Non-surgical or sham  
125 treatments may include, but are not limited to, sham surgery, pain and/or anti-inflammatory medication,  
126 exercise programs, and/or watchful waiting. Trials that included persons with traumatic meniscal lesions,  
127 defined as being the result of a specific traumatic incident will be excluded. There will be no restrictions on  
128 publication date, type of setting, length of follow up, or language.

### 129 **Identification and selection of eligible trials**

130 The search strategy described by Thorlund et al. [7] will be adopted to systematically search for eligible trials in  
131 Medline, Embase, CINAHL, Web of Science, and the Cochrane Central Register of Controlled Trials (CENTRAL).  
132 (Additional file 1) The identified studies will be exported to EROS (Early Review Organizing Software, developed  
133 by Institute of Clinical Effectiveness and Health Policy, Buenos Aires, Argentina) to remove duplicates, and

1  
2  
3 134 randomly allocate references to two independent reviewers responsible for screening and selection. The two  
4  
5 135 reviewers will independently screen all titles and abstracts of identified reports for eligibility. Full-text copies of  
6  
7 136 all publications regarded as potentially eligible for inclusion, or where there is any uncertainty, will  
8  
9 137 subsequently be assessed. Trials will be included when they meet the eligibility criteria. Any discrepancies  
10  
11 138 between reviewers will be resolved by discussion, and if necessary, a third reviewer will be consulted. In  
12  
13 139 addition, the reference lists of included studies will be reviewed to identify additional eligible trials. The  
14  
15 140 electronic database search will be supplemented by searching for additional eligible trials in the World Health  
16  
17 141 Organization International Clinical Trials Registry Platform (WHO ICTRP) search portal, which contains the trial  
18  
19 142 registration datasets provided by several registries. This portal includes 16 national and international primary  
20  
21 143 registries, including ClinicalTrials.gov, ANZCTR, JPRN, and ISRCTN. The corresponding authors of eligible trials  
22  
23 144 will be invited to collaborate in the current IPDMA by sharing their data.

#### 25 26 145 **Collection of individual participant data**

#### 27 28 146 **Data collection and transfer**

29  
30  
31 147 Time and effort will be spent in tracing and encouraging original investigators to share their trial data. If no  
32  
33 148 reply is received on a first invitation, additional inquiries will be sent, including inquiries sent to alternative  
34  
35 149 email addresses identified for the corresponding author, inquiries sent to listed co-authors, and to the  
36  
37 150 institution of the corresponding author listed in the original publication. The principal investigators of the  
38  
39 151 original trials collaborating in the current project will be encouraged to actively participate in the IPDMA and  
40  
41 152 discuss and finalize the definitions and outcomes to be assessed and the analytical processes proposed. Where  
42  
43 153 possible, a face-to-face collaborator meeting will be scheduled, at which key decisions, including the project  
44  
45 154 design, analysis plan, and interpretation of findings will be discussed. Before sharing of the de-identified data,  
46  
47 155 we will sign a data sharing agreement with those principal investigators of the original trials that are interested  
48  
49 156 in collaboration, in which we will arrange that the research data will be used for the declared purposes and the  
50  
51 157 data will be stored on secured servers located in the Netherlands.

#### 52 53 54 158 **Data check and risk of bias**

55  
56 159 All received data will first be validated to match the results of the original publication. Statistical tests will be  
57  
58 160 repeated and analyzed in R (R Foundation for Statistical Computing, Vienna, Austria). The trial data provided by  
59  
60

1  
2  
3 161 original investigators will be checked for consistency, plausibility, integrity of randomization, and  
4  
5 162 reproducibility of published trial results. The aims of checking data are to increase the probability that data  
6  
7 163 supplied are accurate, and to confirm that trials were appropriately randomized. Inconsistencies will be  
8  
9 164 discussed and resolved with the individual investigators. All checked and de-identified data of randomized  
10  
11 165 participants will be entered into a pooled database, and every trial will be assigned a trial number. Data will  
12  
13 166 include characteristics relating to the participants (age, gender, body mass index (BMI)); radiographic  
14  
15 167 information on knee osteoarthritis; onset, duration, and severity of symptoms; generic and disease-specific  
16  
17 168 health-related quality-of-life); non-surgical or sham procedure; trial (sample size, setting, allocation  
18  
19 169 concealment); and outcome measures of interest. For eligible trials of which original data is not available the  
20  
21 170 aggregated data from trial reports will be collected.

22  
23 171         Checking the IPD directly can provide more reliable investigations of key potential biases, some of  
24  
25 172 which might be reduced or alleviated in the process. The risk of bias in included trials will be independently  
26  
27 173 assessed by checking the IPD directly. Randomization and allocation concealment will be assessed by checking  
28  
29 174 if both treatment arms are balanced in every study.[26] The advantage of an IPDMA is that we can also include  
30  
31 175 outcomes not reported by the original journal article, possibly reducing outcome reporting bias by checking all  
32  
33 176 relevant outcomes at the same time. In order to avoid ecological bias, the within-trial information will be  
34  
35 177 examined for individual predictors of treatment effect, separately from the across-trial information.[27]

36  
37 178         The potential for publication bias and small study effects will be examined, in the context of visual  
38  
39 179 inspection, using a contour-enhanced funnel plot.[28,29] To avoid availability bias, aggregated data from  
40  
41 180 studies lacking individual participant data will be used to consider their potential impact. To enable to  
42  
43 181 assessment of heterogeneity between the included trials, the following characteristics of the included RCTs will  
44  
45 182 be compared and described in a table: 1) selection of participants, 2) inclusion- and exclusion criteria, 3)  
46  
47 183 description of clinical path prior to inclusion, 4) number of participants that declined participation, 5) diagnostic  
48  
49 184 characteristics, 6) work characteristics, 7) socioeconomic characteristics, 8) intervention and control treatment,  
50  
51 185 9) cross-over, 10) other health care services during follow-up, and 11) outcome measures.

52  
53  
54 186

55  
56 187 **Missing data**  
57  
58  
59  
60



1  
2  
3 188 The final IPDMA dataset will have a multilevel (i.e. clustered) structure, where the individual trials are the levels  
4  
5 189 (i.e. clusters). A foreseen feature of this dataset will be that some variables will be systematically missing, that  
6  
7 190 is missing for all individuals in one or more trials. Next to systematically missing variables, we may also  
8  
9 191 encounter sporadically missing variables, that is missing for some but not all individuals in one or more trials.

10  
11 192 In order to optimally use the available participant data, reduce bias, and to increase statistical efficiency,  
12  
13 193 incomplete data will be imputed using imputation methods that handle both systematically and sporadically  
14  
15 194 missing covariates in a two-level structure using hierarchical multiple imputations by chained equations (MICE).  
16  
17 195 [30–33]

### 196 **Outcomes variables**

197 The most important outcomes according to surgeons and patients is treatment effect, determined as the  
198 difference between the intervention (surgery) and control group (non-surgical treatment) in knee pain,  
199 function and quality of life 2 years after the intervention. The preferred outcome measure instrument will be  
200 the Knee injury and Osteoarthritis Outcome Scale (KOOS). The KOOS is an instrument developed with the  
201 purpose of evaluating short-term and long-term symptoms and function in subjects with a knee injury and  
202 osteoarthritis. The KOOS consists of 5 subscales: pain, other symptoms, function in daily living, function in sport  
203 and recreation, and knee-related quality of life and a composite score can be calculated (referred to as the  
204 KOOS5). The KOOS has been validated for several orthopedic interventions such as anterior cruciate ligament  
205 reconstruction, meniscectomy and total knee replacement. [34] The score of the KOOS pain subscales will be  
206 compared between the intervention and control group across the included studies. Other measurement  
207 instrument targeted at quantifying pain will be standardized and combined in one single pain outcome. The  
208 functional outcome will be measured by using the KOOS function subscale or equivalent outcome aimed to  
209 measure function. The health quality of life will be measured by using the EuroQol-5 dimensions (EQ5D)  
210 questionnaire or the 36-Item Short Form Survey (SF-36).

211 Other outcomes of interest will include the difference between intervention and control group in adverse  
212 events (defined as deep venous thrombosis, pulmonary thromboembolism, venous thromboembolism,  
213 infection, and death) associated with the intervention from baseline to 2 years after intervention; difference in  
214 mental health; difference in risk for future knee replacement surgery between groups (feasibility will depend

1  
2  
3 215 on whether the follow up of the trials will be long enough to capture the events), and the effect of follow-up  
4  
5 216 time after the intervention on the treatment effect.  
6

7  
8 217 **Part 2: Analysis**

9  
10 218 **Treatment effect**

11  
12  
13 219 The IPDMA will be used to assess the general effectiveness of APM in comparison with non-surgical or sham  
14  
15 220 treatments in patients with knee symptoms and degenerative meniscal lesions. For this part, we will apply both  
16  
17 221 a two-stage and one-stage approach.[35] In the two-stage approach, we will perform regression analyses for  
18  
19 222 each study to obtain effect estimates separately. Thereafter these are pooled in a random effects model (to  
20  
21 223 account for heterogeneity) like a regular meta-analysis. The random effects models in the two-stage will be  
22  
23 224 analyzed using the restricted maximum likelihood (REML) approach with the Hartung-Knapp-Sidik-Jonkman  
24  
25 225 method for continuous outcomes to account for uncertainty due to heterogeneity.[36] The two-stage approach  
26  
27 226 is ideal for assessing pooled treatment effect and detect heterogeneity. However, it is difficult to detect non-  
28  
29 227 linear trends or account for correlating covariates.

30  
31 228 In the one-stage approach, the IPD from all studies will be analyzed simultaneously by adopting a  
32  
33 229 single statistical model (random effects model) that fully accounts for heterogeneity across studies whilst  
34  
35 230 accounting for the clustering of participants within studies. The one-stage approach is more flexible and more  
36  
37 231 exact compared to the two-stage but can face computational difficulties. Therefore, the results from the one-  
38  
39 232 stage will be compared to the results of the two-stage and differences will be investigated. The random effects  
40  
41 233 models in the one-stage will be analyzed using the REML approach with the Kenward-Rogers approach for  
42  
43 234 continuous outcome and the maximum likelihood method (ML) with quadrature for binary or survival  
44  
45 235 outcomes.[35,37,38] Heterogeneity will be addressed by  $I^2$  and  $\tau^2$ , reflecting the heterogeneity between  
46  
47 236 studies. To reflect the variation of the treatment effect in a different setting, 95% prediction intervals will be  
48  
49 237 reported to provide more information on the expected effect in future patients.[39]

50  
51 238 A key advantage of a one-stage approach is the flexibility in terms of the models that may be fitted  
52  
53 239 compared to a two-stage approach. One-stage models allow for the inclusion of multiple covariates in a single  
54  
55 240 model, multiple random-effects on different parameters, correlation between covariates and the separation of  
56  
57 241 within and across-trials information. It is this flexibility that is essential to the primary objective of this IPDMA.  
58  
59 242 [40]  
60

### 243 **Heterogeneity in treatment effect (subgroups)**

244 To investigate which patients may benefit from (partial) meniscectomy we will assess whether the treatment  
245 effect is modified by baseline patient characteristics. First, relevant baseline patient characteristics will be  
246 identified. Modern regression procedures with penalization of estimated regression coefficients will be applied  
247 for the selection of those characteristics that are independent predictors of the treatment effect.[41,42] A full  
248 list of the baseline patient characteristics that will be taken into consideration are listed in Additional file 2.  
249 Second, it will be assessed whether these identified independent baseline predictors, (individually or in  
250 combinations) modify the treatment effect. Effect modification will be assessed with a random effects model.  
251 In this model, a dummy for the particular study will be the random effect and APM (yes vs. no), the potential  
252 effect modifier, and an interaction term (APM \* potential effect modifier) will be included as fixed variables  
253 and the treatment effect as dependent variables.[33] The illustrated approach will allow assessment of effect  
254 modification without overfitting the data and reducing the risk of type I errors.

255 In addition, we want to ensure that patient characteristics deemed to be of high clinical relevance in day-  
256 to-day clinical practice are ultimately evaluated for effect modification. For this purpose, alongside the  
257 procedure described above, we will also assess a set of predefined patient characteristics deemed to be of high  
258 clinical relevance for effect modification. To define these characteristics the IPDMA collaborators will be asked  
259 to provide a top-3 of characteristics that they regard as most clinically relevant. Subsequently, it will be  
260 assessed whether the overall top-3 of these predefined patient characteristics modify the treatment effect.  
261 Predefining these characteristics will be performed before actual analysis of the data.

### 262 **Sensitivity analysis**

263 To analyze the robustness of the results from the IPDMA, several sensitivity analyses will be performed. First,  
264 to evaluate the impact of including aggregated data of published trials (of which the IPD was not available in  
265 the meta-analysis), analyses will be performed in which we either only include studies with IPD available or  
266 only studies of which only aggregated data was available. Second, to determine the effect of imputation of  
267 missing values on the study outcome, analyses will be performed in which we impute either only systematic  
268 missing variables, only sporadically missing variables (within trials) or not impute at all. Third, we will study  
269 whether the persistence of complains is a relevant subgrouping variable.

270 All analyses will be performed according to the intention-to-treat principle.

1  
2  
3 271 **Publication considerations**  
4

5 272 The draft version of the final manuscript will be circulated among the collaborators for further discussion prior  
6  
7 273 to submission for publication. The authors of the IPDMA paper(s) will be the project team managing the  
8  
9 274 IPDMA, followed by the collaborators, whom are the principal investigators that collaborated in the current  
10  
11 275 project by sharing their trial data and commenting upon the results and draft of the papers.  
12  
13

14  
15 276 **Study status**  
16

17  
18 277 Currently, we are collecting the data and are contacting the original investigators of the included trials and  
19  
20 278 encourage them to share the trial data. We have already received a part of the data and are still waiting on the  
21  
22 279 data of a few trials. We expect to end data collection in Q1 2020. After validation of the data, we will start with  
23  
24 280 the analyses. Our aim is to publish our results in 2020/2021.  
25

26 281  
27  
28 282 **Discussion**  
29

30  
31 283 In the last decade, several RCTs found no or very little benefit of APM compared to non-operative or sham  
32  
33 284 treatment in patients with MRI confirmed degenerative meniscus tears,[43–52] although there is some  
34  
35 285 evidence that it is effective in middle-aged patients with degenerative meniscal symptoms.[53] These findings  
36  
37 286 started a discussion on the effectiveness of the surgery and the methodology used in those RCTs by both  
38  
39 287 orthopedic surgeons and other health care professionals.[19–23,54] The published studies were not able to  
40  
41 288 adequately tease out whether or not there are subgroups that do additionally benefit from APM. This has  
42  
43 289 resulted in a deadlock: APM is continued to be performed, despite Level I evidence that discourage the  
44  
45 290 treatment.[13]

46  
47 291 The proposed IPDMA provides the opportunity to evaluate the relationship between potential  
48  
49 292 clinically-relevant baseline characteristics and the effectiveness of the APM of all patients that have been  
50  
51 293 included in the trials, and to possibly detect subgroups that may benefit from APM. IPDMA is the gold standard  
52  
53 294 of systematic review and meta-analysis that provides more power and is less prone to bias compared to meta-  
54  
55 295 analysis on aggregated data. To our knowledge, this is the first study that combines the individual participant  
56  
57 296 data of RCTs performed on APM, maximizing the capability to detect subgroups that may benefit from the  
58  
59 297 surgery. The main advantage of an IPDMA is that no large-scale RCT is required, but instead the power of  
60

1  
2  
3 298 existing studies is combined to achieve large patient numbers. This prevents additional trials and patient  
4  
5 299 involvement. Moreover, combining individual patient data enables us to analyze the effects of within-study and  
6  
7 300 between-study moderators of effect sizes, even though the original studies were too small to analyze such  
8  
9 301 samples.

10  
11 302 Although IPDMA is the best method to detect possible subgroups, performing an IPDMA also comes  
12  
13 303 with several challenges. First, all individual patient data from the eligible trials have to be collected. This time-  
14  
15 304 intensive task often requires us to contact the principal investigators multiple times to invite them to  
16  
17 305 collaborate. Unfortunately, data is sometimes not available, not accessible or sharing is not possible due to a  
18  
19 306 stringent informed consent that only enables the use of the data for the original study. While there are guiding  
20  
21 307 principles for open data management and sharing (Findable, Accessible, Interoperable and Reusable data  
22  
23 308 principles (FAIR principles)) these often conflict with the rules of the informed consent or national legislations,  
24  
25 309 creating a tension between privacy and reuse of (anonymous) medical data.[55] This might limit number of  
26  
27 310 studies that can be included in this IPDMA. Second, there are multiple ways to measure knee pain, knee  
28  
29 311 function or general quality of life. Every researcher can or will use their own set of outcome parameters,  
30  
31 312 dependent on the experience of the researcher with a certain questionnaire/scoring system, preference or the  
32  
33 313 time-dependent academic insights of the optimal questionnaire/scoring system (especially if studies have been  
34  
35 314 published in different time periods, i.e. different research paradigm). As a result, we are dependent on the  
36  
37 315 outcomes that have been used in the included studies in the IPDMA and cause systematic missing variables in  
38  
39 316 the final pooled dataset of an IPDMA. These missing variables pose a methodological challenge, because they  
40  
41 317 require advanced imputation that preserve the hierarchical structure of the data followed by the one-stage  
42  
43 318 meta-analysis.[56]

44  
45 319 In conclusion, the aim of this project is to identify potential subgroups of patients with degenerative  
46  
47 320 meniscus lesions who may benefit from APM. It will provide the evidence base to update and tailor diagnostic  
48  
49 321 and treatment protocols as well as (international) guidelines for patients for whom orthopedic surgeons  
50  
51 322 consider APM. Identifying potential subgroups can improve the quality of life of patients who *do* truly benefit  
52  
53 323 from the treatment, and can perhaps be implemented with a clinical decision aid. In case we do not find a  
54  
55 324 subgroup that has additional benefits from the treatment, it can help to reduce the number of APMs, and thus  
56  
57 325 less risk of, e.g. complications.[9,57]  
58  
59  
60 326

1  
2  
3 327 **List of abbreviations**  
4

|    |           |                                                                              |
|----|-----------|------------------------------------------------------------------------------|
| 5  | APM       | Arthroscopic partial meniscectomy                                            |
| 6  | RCT       | Randomized controlled trial                                                  |
| 7  | IPDMA     | Individual participant data meta-analysis                                    |
| 8  | PRISMA-P  | Preferred Reporting Items for Systematic Reviews and Meta-Analysis protocols |
| 9  | CENTRAL   | Cochrane Central Register of Controlled Trials                               |
| 10 | EROS      | Early Review Organizing Software                                             |
| 11 | WHO ICTRP | World Health Organization International Clinical Trials Registry Platform    |
| 12 | BMI       | Body mass index                                                              |
| 13 | MICE      | Multiple imputations by chained equations                                    |
| 14 | KOOS      | Knee injury and Osteoarthritis Outcome Scale                                 |
| 15 | EQ5D      | EuroQol-5 dimensions questionnaire                                           |
| 16 | SF-36     | 36-Item Short Form Survey                                                    |
| 17 | REML      | Restricted maximum likelihood                                                |
| 18 | ML        | Maximum likelihood                                                           |
| 19 | FAIR      | Findable, Accessible, Interoperable and Reusable data principles             |

20  
21  
22  
23  
24  
25  
26  
27  
28  
29 328

30  
31  
32 329 **Declarations**  
33

34 330 **Ethics approval and consent to participate**  
35

36  
37 331 All principal investigators provided written confirmation that all participants included in the original trials had  
38  
39 332 given informed consent.

40  
41 333 **Consent for publication**  
42

43  
44 334 Not applicable  
45

46 335 **Availability of data and material**  
47

48  
49 336 Following the ICMJE's data sharing statement policy, de-identified individual participant data will be made  
50  
51 337 available at the end of the research project, including the study protocol, beginning 9 months and ending 36  
52  
53 338 months following article publication. The data will be shared with investigators whose proposed use of the data  
54  
55 339 has been approved by a review committee to be identified for this purpose. Proposals may be submitted up to  
56  
57 340 36 months following article publication. After 36 months the data will be available in our University's data  
58  
59 341 warehouse without investigator support other than deposited metadata.  
60

1  
2  
3 342 **Competing interests**  
4

5 343 The authors declare that they have no competing interest  
6  
7

8 344 **Funding**  
9

10 345 Junior Research project (2018) grant provided by the Radboud Institute for Health Sciences, Radboud  
11  
12 346 University Medical Center, Nijmegen, The Netherlands.  
13  
14

15 347 **Authors' contributions**  
16

17 348 JR, GH, and MR conceived the idea for the review, with inputs from HØ, MR, ER, KH, VG, RP, and ME. SW, MR,  
18  
19 349 JR and GH designed and drafted the protocol. All authors (SW, MR, JR, HØ, MR, ER, KH, VG, RP, ME, and GH)  
20  
21 350 contributed to subsequent revisions and approved the protocol prior to its submission. GH is the guarantor.  
22  
23

24 351 **Acknowledgements**  
25

26 352 None  
27  
28  
29 353  
30

31 354 **References**  
32

- 33  
34 355 1. Abrams GD, Frank RM, Gupta AK, Harris JD, McCormick FM, Cole BJ. Trends in meniscus repair and  
35  
36 356 meniscectomy in the United States, 2005-2011. *Am. J. Sports Med.* 2013;41(10):2333–9.  
37  
38 357 2. Cullen KA, Hall MJ, Golosinskiy A. Ambulatory surgery in the United States, 2006. *Natl. Health Stat.*  
39  
40 358 *Report.* 2009;(11):1–25.  
41  
42 359 3. Roos E, Lohmander S. [Young patients--old knees. Knee problems in the middle age often  
43  
44 360 osteoarthritis]. *Lakartidningen.* 2009;106(24–25):1645–8.  
45  
46 361 4. Buchbinder R, Harris IA, Sprowson A. Management of degenerative meniscal tears and the role of  
47  
48 362 surgery. *Br. J. Sports Med.* 2016;50(22):1413–6.  
49  
50 363 5. Englund M, Roemer FW, Hayashi D, Crema MD, Guermazi A. Meniscus pathology, osteoarthritis and the  
51  
52 364 treatment controversy. *Nat. Rev. Rheumatol.* 2012;8(7):412–9.  
53  
54 365 6. Khan M, Evaniew N, Bedi A, Ayeni OR, Bhandari M. Arthroscopic surgery for degenerative tears of the  
55  
56 366 meniscus: A systematic review and meta-analysis. *Cmaj.* 2014;186(14):1057–64.  
57  
58 367 7. Thorlund JB, Juhl CB, Roos EM, Lohmander LS. Arthroscopic surgery for degenerative knee: Systematic  
59  
60

- 1  
2  
3 368 review and meta-analysis of benefits and harms. *Br. J. Sports Med.* 2015;49(19):1229–35.  
4  
5 369 8. Englund M. Bout of the corner men and not the boxers? Contextual effects flex their muscles. *Ann*  
6  
7 370 *Rheum Dis Mon.* 2018;77(2).  
8  
9 371 9. Abram SGF, Judge A, Beard DJ, Price AJ. Adverse outcomes after arthroscopic partial meniscectomy: a  
10  
11 372 study of 700 000 procedures in the national Hospital Episode Statistics database for England. *Lancet.*  
12  
13 373 2018;392(10160):2194–202.  
14  
15 374 10. Hawker G, Guan J, Judge A, Dieppe P. Knee arthroscopy in England and Ontario: Patterns of use,  
16  
17 375 changes over time, and relationship to total knee replacement. *J. Bone Jt. Surg. - Ser. A.*  
18  
19 376 2008;90(11):2337–45.  
20  
21 377 11. Roemer FW, Kwok CK, Hannon MJ, Hunter DJ, Eckstein F, Grago J, et al. Partial meniscectomy is  
22  
23 378 associated with increased risk of incident radiographic osteoarthritis and worsening cartilage damage in  
24  
25 379 the following year. *Eur. Radiol.* 2017;27(1):404–13.  
26  
27 380 12. Rongen JJ, Rovers MM, van Tienen TG, Buma P, Hannink G. Increased risk for knee replacement surgery  
28  
29 381 after arthroscopic surgery for degenerative meniscal tears: a multi-center longitudinal observational  
30  
31 382 study using data from the osteoarthritis initiative. *Osteoarthr. Cartil.* 2017;25(1):23–9.  
32  
33 383 13. Rongen JJ, van Tienen TG, Buma P, Hannink G. Meniscus surgery is still widely performed in the  
34  
35 384 treatment of degenerative meniscus tears in The Netherlands. *Knee Surgery, Sport. Traumatol.*  
36  
37 385 *Arthrosc.* 2018;26(4):1123–9.  
38  
39 386 14. Thorlund JB, Hare KB, Lohmander LS. Large increase in arthroscopic meniscus surgery in the middle-  
40  
41 387 aged and older population in Denmark from 2000 to 2011. *Acta Orthop.* 2014;85(3):287–92.  
42  
43 388 15. Lazic S, Boughton O, Hing C, Bernard J. Arthroscopic washout of the knee: A procedure in decline. *Knee.*  
44  
45 389 2014;21(2):631–4.  
46  
47 390 16. Mattila VM, Sihvonen R, Paloneva J, Felländer-Tsai L. Changes in rates of arthroscopy due to  
48  
49 391 degenerative knee disease and traumatic meniscal tears in Finland and Sweden. *Acta Orthop.*  
50  
51 392 2016;87(1):5–11.  
52  
53 393 17. Kim S, Bosque J, Meehan JP, Jamali A, Marder R. Increase in outpatient knee arthroscopy in the United  
54  
55 394 States: A comparison of national surveys of ambulatory surgery, 1996 and 2006. *J. Bone Jt. Surg. - Ser.*  
56  
57 395 *A.* 2011;93(11):994–1000.  
58  
59 396 18. Jevsevar DS, Yates AJ, Sanders JO. Arthroscopic Partial Meniscectomy for Degenerative Meniscal Tear.



- 1  
2  
3 397 N. Engl. J. Med. 2014;370(13):1259–61.  
4  
5 398 19. Elattrache N, Lattermann C, Hannon M, Cole B. New England Journal of Medicine article evaluating the  
6  
7 399 usefulness of Meniscectomy is flawed. *Arthrosc. - J. Arthrosc. Relat. Surg.* 2014;30(5):542–3.  
8  
9 400 20. Lattermann C, Gomoll A, Cole B. Arthroscopic Partial Meniscectomy for Degenerative Meniscal Tear. *N.*  
10  
11 401 *Engl. J. Med.* 2014;370(13):1259–61.  
12  
13 402 21. Krych A, Stuart M LB. Arthroscopic Partial Meniscectomy for Degenerative Meniscal Tear. *N. Engl. J.*  
14  
15 403 *Med.* 2014;370(13):1259–61.  
16  
17 404 22. Lubowitz JH, D’Agostino RB, Provencher MT, Rossi MJ, Brand JC. Can We Trust Knee Meniscus Studies?  
18  
19 405 One-Way Crossover Confounds Intent-to-Treat Statistical Methods. *Arthroscopy.* 2016;32(11):2187–90.  
20  
21 406 23. McIntyre LF. Making Sure the Media Gets It Right on Orthopaedic Research. *Arthrosc. - J. Arthrosc.*  
22  
23 407 *Relat. Surg.* 2016;32(11):2416–7.  
24  
25 408 24. Katz JN, Wright J, Spindler KP, Mandl LA, Safran-Norton CE, Reinke EK, et al. Predictors and outcomes of  
26  
27 409 crossover to surgery from physical therapy for meniscal tear and osteoarthritis a randomized trial  
28  
29 410 comparing physical therapy and surgery. *J. Bone Jt. Surg. - Am. Vol.* 2016;98(22):1890–6.  
30  
31 411 25. Moher D, Shamseer L, Clarke M, Ghersi D, Liberati A, Petticrew M, et al. Preferred reporting items for  
32  
33 412 systematic review and meta-analysis protocols (PRISMA-P) 2015 statement. *Syst. Rev.* 2015;4:1.  
34  
35 413 26. Tierney JF, Vale C, Riley R, Smith CT, Stewart L, Clarke M, et al. Individual participant data (IPD)  
36  
37 414 metaanalyses of randomised controlled trials: Guidance on their use. *PLoS Med.* 2015;12(7).  
38  
39 415 27. Hua H, Burke DL, Crowther MJ, Ensor J, Tudur Smith C, Riley RD. One-stage individual participant data  
40  
41 416 meta-analysis models: estimation of treatment-covariate interactions must avoid ecological bias by  
42  
43 417 separating out within-trial and across-trial information. *Stat. Med.* 2017;36(5):772–89.  
44  
45 418 28. Sterne JAC, Sutton AJ, Ioannidis JPA, Terrin N, Jones DR, Lau J, et al. Recommendations for examining  
46  
47 419 and interpreting funnel plot asymmetry in meta-analyses of randomised controlled trials. *BMJ.*  
48  
49 420 2011;343(7818):d4002.  
50  
51 421 29. Peters JL, Sutton AJ, Jones DR, Abrams KR, Rushton L. Contour-enhanced meta-analysis funnel plots  
52  
53 422 help distinguish publication bias from other causes of asymmetry. *J. Clin. Epidemiol.* 2008;61(10):991–  
54  
55 423 6.  
56  
57 424 30. Resche-Rigon M, White IR. Multiple imputation by chained equations for systematically and  
58  
59 425 sporadically missing multilevel data. *Stat. Methods Med. Res.* 2018;27(6):1634–49.

- 1  
2  
3 426 31. Jolani S, Debray TPA, Koffijberg H, van Buuren S, Moons KGM. Imputation of systematically missing  
4  
5 427 predictors in an individual participant data meta-analysis: A generalized approach using MICE. *Stat.*  
6  
7 428 *Med.* 2015;34(11):1841–63.
- 8  
9 429 32. Burgess S, White IR, Resche-Rigon M, Wood AM. Combining multiple imputation and meta-analysis  
10  
11 430 with individual participant data. *Stat. Med.* 2013;32(26):4499–514.
- 12  
13 431 33. Debray TPA, Moons KGM, van Valkenhoef G, Efthimiou O, Hummel N, Groenwold RHH, et al. Get real in  
14  
15 432 individual participant data (IPD) meta-analysis: A review of the methodology. *Res. Synth. Methods.*  
16  
17 433 2015;6(4):293–309.
- 18  
19 434 34. Rongen JJ, Hannink G. Comparison of registered and published primary outcomes in randomized  
20  
21 435 controlled trials of orthopaedic surgical interventions. *J. Bone Jt. Surg. - Am. Vol.* 2016;98(5):403–9.
- 22  
23 436 35. Burke DL, Ensor J, Riley RD. Meta-analysis using individual participant data: one-stage and two-stage  
24  
25 437 approaches, and why they may differ. *Stat. Med.* 2017;36(5):855–75.
- 26  
27 438 36. Knapp G, Hartung J. Improved tests for a random effects meta-regression with a single covariate. *Stat.*  
28  
29 439 *Med.* 2003;22(17):2693–710.
- 30  
31 440 37. Turner RM, Omar RZ, Yang M, Goldstein H, Thompson SG. A multilevel model framework for meta-  
32  
33 441 analysis of clinical trials with binary outcomes. *Stat. Med.* 2000;19(24):3417–32.
- 34  
35 442 38. Higgins JPT, Whitehead A, Turner RM, Omar RZ, Thompson SG. Meta-analysis of continuous outcome  
36  
37 443 data from individual patients. *Stat. Med.* 2001;20(15):2219–41.
- 38  
39 444 39. IntHout J, Ioannidis JPA, Rovers MM, Goeman JJ. Plea for routinely presenting prediction intervals in  
40  
41 445 meta-analysis. *BMJ Open.* 2016;6(7):e010247.
- 42  
43 446 40. Stewart GB, Altman DG, Askie LM, Duley L, Simmonds MC, Stewart LA. Statistical Analysis of Individual  
44  
45 447 Participant Data Meta-Analyses: A Comparison of Methods and Recommendations for Practice. *PLoS*  
46  
47 448 *One.* 2012;7(10):e46042.
- 48  
49 449 41. Steyerberg EW. *Clinical Prediction Models: A Practical Approach to Development, Validation, and*  
50  
51 450 *Updating.* New York, NY: Springer New York; 2009.
- 52  
53 451 42. Steyerberg EW, Uno H, Ioannidis JPA, van Calster B, Ukaegbu C, Dhingra T, et al. Poor performance of  
54  
55 452 clinical prediction models: the harm of commonly applied methods. *J. Clin. Epidemiol.* 2018;98:133–43.
- 56  
57 453 43. Biedert RM. Treatment of intrasubstance meniscal lesions: a randomized prospective study of four  
58  
59 454 different methods. *Knee Surgery, Sport. Traumatol. Arthrosc.* 2000;8(2):104–8.

- 1  
2  
3 455 44. Herrlin S, Hållander M, Wange P, Weidenhielm L, Werner S. Arthroscopic or conservative treatment of  
4  
5 456 degenerative medial meniscal tears: A prospective randomised trial. *Knee Surgery, Sport. Traumatol.*  
6  
7 457 *Arthrosc.* 2007;15(4):393–401.  
8  
9 458 45. Katz JN, Brophy RH, Chaisson CE, de Chaves L, Cole BJ, Dahm DL, et al. Surgery versus Physical Therapy  
10  
11 459 for a Meniscal Tear and Osteoarthritis. *N. Engl. J. Med.* 2013;368(18):1675–84.  
12  
13 460 46. Kise NJ, Risberg MA, Stensrud S, Ranstam J, Engebretsen L, Roos EM. Exercise therapy versus  
14  
15 461 arthroscopic partial meniscectomy for degenerative meniscal tear in middle aged patients: Randomised  
16  
17 462 controlled trial with two year follow-up. *BMJ.* 2016;354.  
18  
19 463 47. Østerås H, Østerås B, Torstensen TA. Medical exercise therapy, and not arthroscopic surgery, resulted  
20  
21 464 in decreased depression and anxiety in patients with degenerative meniscus injury. *J. Bodyw. Mov.*  
22  
23 465 *Ther.* 2012;16(4):456–63.  
24  
25 466 48. Sihvonen R, Paavola M, Malmivaara A, Itälä A, Joukainen A, Nurmi H, et al. Arthroscopic Partial  
26  
27 467 Meniscectomy versus Sham Surgery for a Degenerative Meniscal Tear. *N. Engl. J. Med.*  
28  
29 468 2013;369(26):2515–24.  
30  
31 469 49. Vermesan D, Prejbeanu R, Laitin S, Damian G, Deleanu B, Abbinante A, et al. Arthroscopic debridement  
32  
33 470 compared to intra-articular steroids in treating degenerative medial meniscal tears. *Eur. Rev. Med.*  
34  
35 471 *Pharmacol. Sci.* 2013;17(23):3192–6.  
36  
37 472 50. Yim JH, Seon JK, Song EK, Choi JI, Kim MC, Lee KB, et al. A comparative study of meniscectomy and  
38  
39 473 nonoperative treatment for degenerative horizontal tears of the medial meniscus. *Am. J. Sports Med.*  
40  
41 474 2013;41(7):1565–70.  
42  
43 475 51. Graaf VA van de, Noorduyn JCA, Willigenburg NW, Butter IK, Gast A de, Mol BW, et al. Effect of Early  
44  
45 476 Surgery vs Physical Therapy on Knee Function Among Patients With Nonobstructive Meniscal Tears:  
46  
47 477 The ESCAPE Randomized Clinical Trial. *Jama.* 2018;320(13):1328–37.  
48  
49 478 52. Roos EM, Hare KB, Nielsen SM, Christensen R, Lohmander LS. Better outcome from arthroscopic partial  
50  
51 479 meniscectomy than skin incisions only? A sham-controlled randomised trial in patients aged 35-55  
52  
53 480 years with knee pain and an MRI-verified meniscal tear. *BMJ Open.* 2018;8(2):e019461.  
54  
55 481 53. Gauffin H, Tagesson S, Meunier A, Magnusson H, Kvist J. Knee arthroscopic surgery is beneficial to  
56  
57 482 middle-aged patients with meniscal symptoms: A prospective, randomised, single-blinded study.  
58  
59 483 *Osteoarthr. Cartil.* 2014;22(11):1808–16.

- 1  
2  
3 484 54. Hellerman C. You may not be better off after knee surgery [Internet]. CNN. 2013 [cited 2018 Oct 31].  
4  
5 485 Available from: <https://edition.cnn.com/2013/12/26/health/knee-surgery-study/index.html>  
6  
7 486 55. Wilkinson MD, Dumontier M, Aalbersberg IJ, Appleton G, Axton M, Baak A, et al. The FAIR Guiding  
8  
9 487 Principles for scientific data management and stewardship. *Sci. Data*. 2016;3:160018.  
10  
11 488 56. Debray T, Jolani S, Schierenberg A, Moons K. Dealing with missing data in an individual participant data  
12  
13 489 meta-analysis: one--stage versus two--stage methods | Colloquium Abstracts. *Abstr. 24th Cochrane*  
14  
15 490 *Colloq.* 2016;23-27 Oct.  
16  
17 491 57. Friberger Pajalic K, Turkiewicz A, Englund M. Update on the risks of complications after knee  
18  
19 492 arthroscopy. *BMC Musculoskelet. Disord.* 2018;19(1):179.

21  
22 493 **Additional files:**

23  
24 494 File name: Additional file 1

25  
26 495 File format: Additional\_file\_1.doc

27  
28 496 Title: Systematic search of literature to detect randomized controlled trials that compared (partial) arthroscopic  
29  
30 497 meniscectomy to sham surgery or non-surgical techniques.

31  
32 498 Description: The systematic search strategy in Medline (PubMed), Embase, CENTRAL, CINAHL, Web of Science  
33  
34 499 and WHO trial register to detect randomized controlled trials that compared (partial) arthroscopic  
35  
36 500 meniscectomy to sham surgery or non-surgical techniques.

37  
38  
39 501

40  
41 502 File name: Additional file 2

42  
43 503 File format: Additional\_file\_2.doc

44  
45 504 Title: Potential clinically relevant baseline characteristics

46  
47 505 Description: A list of all identified potential clinically relevant baseline characteristics divided into 5 categories:

48  
49 506 General characteristics, patient history, meniscus information, symptoms and quality of life.  
50  
51  
52  
53  
54  
55  
56  
57  
58  
59  
60

**Additional file 1: Systematic search of literature to detect randomized controlled trials that compared (partial) arthroscopic meniscectomy to sham surgery or non-surgical techniques.**

|    | <b>Medline (Pubmed)</b>                         | <b>Embase</b>                                    | <b>Cochrane Database of registered trial (CENTRAL)</b>                                                    | <b>Cumulative Index to Nursing and Allied Health Literature (CINAHL)</b>                                    | <b>Web of Science (Thomson Reuter)</b> | <b>WHO trial register</b>     |
|----|-------------------------------------------------|--------------------------------------------------|-----------------------------------------------------------------------------------------------------------|-------------------------------------------------------------------------------------------------------------|----------------------------------------|-------------------------------|
| 1  | "Menisci, Tibial/surgery"[Mesh]                 | Arthroscopic meniscectomy.ti,ab,kw.              | MeSH descriptor: [Menisci, Tibial] explode all trees and with qualifier(s): [Injuries – IN, Surgery – SU] | TI "Degenerative meniscal tear" OR AB "Degenerative meniscal tear"                                          | arthroscopy AND knee                   | "Menisc*" in the title        |
| 2  | "Menisci, Tibial/injuries"[Mesh]                | Arthroscopic debridement.ti,ab,kw.               | MeSH descriptor: [Arthroscopy] explode all trees                                                          | MH "Arthroscopy" OR "arthroscopy"                                                                           | arthroscopic meniscectomy              | "Menisc*" in the condition    |
| 3  | "Degenerative meniscal tear"[TIAB]              | Arthroscopic lavage.ti,ab,kw.                    | MeSH descriptor: [Knee] explode all trees                                                                 | MH "knee" OR AB "knee" OR TI "knee"                                                                         | arthroscopic debridement               | "Menisc*" in the intervention |
| 4  | "Arthroscopic lavage"[TIAB]                     | Degenerative meniscal tear.ti,ab,kw.             | 2 and 3                                                                                                   | 2 AND 3                                                                                                     | arthroscopic lavage                    | 1 OR 2 OR 3                   |
| 5  | "Arthroscopic debridement"[TIAB]                | knee meniscus/ or meniscus tibial.mp             | Degenerative meniscal tear:ti,ab,kw (Word variations have been searched)                                  | MH "Meniscal Injuries" OR AB "meniscal Injuries" OR TI "meniscal Injuries"                                  | degenerative meniscal tear             |                               |
| 6  | "arthroscopic meniscectomy"[TIAB]               | exp knee arthroscopy/                            | Arthroscopic lavage:ti,ab,kw (Word variations have been searched)                                         | MH "Menisci, Tibial" OR AB "tibial meniscus" OR TI "tibial meniscus"                                        | menisci, tibial AND surgery            |                               |
| 7  | "Arthroscopy"[TIAB] AND "Knee"[TIAB]            | 1 or 2 or 3 or 4 or 5 or 6                       | Arthroscopic debridement:ti,ab,kw (Word variations have been searched)                                    | TI "Arthroscopic lavage" OR AB "Arthroscopic lavage"                                                        | menisci, tibial AND injury             |                               |
| 8  | 1 OR 2 OR 3 OR 4 OR 5 OR 6 OR 7                 | randomized controlled trial/                     | arthroscopic meniscectomy:ti,ab,kw (Word variations have been searched)                                   | TI "Arthroscopic debridement" OR AB "Arthroscopic debridement"                                              | 1 OR 2 OR 3 OR 4 OR 5 OR 6 OR 7        |                               |
| 9  | "Randomized" [TIAB]                             | randomized.ti,ab,kw.                             | 1 or 4 or 5 or 6 or 7 or 8                                                                                | TI "arthroscopic meniscectomy" OR AB "arthroscopic meniscectomy"                                            | randomized                             |                               |
| 10 | "Randomized controlled trial"[Publication Type] | randomized.ti,ab,kw.                             |                                                                                                           | 1 OR 4 OR 5 OR 6 OR 7 OR 8 OR 9                                                                             | randomised                             |                               |
| 11 | "randomized controlled trials as topic"[Mesh]   | random allocation.mp.                            |                                                                                                           | TI "Randomized" OR AB "Randomized"                                                                          | random allocation                      |                               |
| 12 | "Random allocation"[Mesh]                       | randomized.mp.                                   |                                                                                                           | MH "Randomized Controlled Trials" OR TI "Randomized Controlled Trials" OR AB "Randomized Controlled Trials" | control group                          |                               |
| 13 | "Control group"[TIAB]                           | "randomized controlled trial (topic)"/           |                                                                                                           | MH "Random Assignment" OR AB "Random Assignment" OR TI "Random Assignment"                                  | cross-over stud*                       |                               |
| 14 | "Control groups"[Mesh]                          | control group.mp.                                |                                                                                                           | AB "Random Allocation" OR TI "Random Allocation"                                                            | randomized controlled trial            |                               |
| 15 | "Cross-over studies"[TIAB]                      | control group/                                   |                                                                                                           | (MH "Control Group") OR (AB "Control Group") OR (TI "Control Group")                                        | 9 OR 10 OR 11 OR 12 OR 13 OR 14        |                               |
| 16 | "Cross-over study"[TIAB]                        | crossover procedure/                             |                                                                                                           | (MH "Crossover Design") AND (AB "Crossover Design") AND (TI "Crossover Design")                             | 8 AND 15                               |                               |
| 17 | 9 OR 10 OR 11 OR 12 OR 13 OR 14 OR 15 OR 16     | 8 or 9 or 10 or 11 or 12 or 13 or 14 or 15 or 16 |                                                                                                           | 11 OR 12 OR 13 OR 14 OR 15 OR 16                                                                            |                                        |                               |
| 18 | 8 AND 17                                        | 7 and 17                                         |                                                                                                           | 10 AND 17                                                                                                   |                                        |                               |

## Additional file 2. Potential clinically relevant baseline characteristics

| Category                | Characteristics                                              |
|-------------------------|--------------------------------------------------------------|
| General characteristics | Age                                                          |
|                         | Gender                                                       |
|                         | Weight, height (BMI)                                         |
| Patient history         | History of medication for knee symptoms                      |
|                         | History of serious knee injury                               |
|                         | History of knee surgery                                      |
|                         | Family history of knee OA / of knee replacement surgery      |
|                         | History of osteoarthritis                                    |
| Meniscus information    | Medial/lateral meniscus                                      |
|                         | Radiographic severity of knee OA                             |
|                         | MRI meniscus extrusion                                       |
|                         | MRI meniscus tear type / degeneration                        |
|                         | Onset of symptoms (e.g. gradual, after event, suddenly)      |
|                         | Duration of symptoms                                         |
|                         | Grading of work and sporting activities                      |
| Symptoms                | Signs and symptoms during specific physical examination test |
|                         | Knee locking symptoms / mechanical symptoms                  |
|                         | Knee related daily function                                  |
|                         | Knee pain                                                    |
|                         | Knee stiffness                                               |
|                         | Knee related quality of life                                 |
|                         | Knee swelling                                                |
| Quality of life         | Generic quality of life (EQ-5D / SF36)                       |
|                         | Mental health score                                          |

## PRISMA-P 2015 Checklist

This checklist has been adapted for use with systematic review protocol submissions to BioMed Central journals from Table 3 in Moher D et al: Preferred reporting items for systematic review and meta-analysis protocols (PRISMA-P) 2015 statement. *Systematic Reviews* 2015 4:1

An Editorial from the Editors-in-Chief of *Systematic Reviews* details why this checklist was adapted - Moher D, Stewart L & Shekelle P: Implementing PRISMA-P: recommendations for prospective authors. *Systematic Reviews* 2016 5:15

| Section/topic                     | #  | Checklist item                                                                                                                                                                                  | Information reported                |                                     | Line number(s) |
|-----------------------------------|----|-------------------------------------------------------------------------------------------------------------------------------------------------------------------------------------------------|-------------------------------------|-------------------------------------|----------------|
|                                   |    |                                                                                                                                                                                                 | Yes                                 | No                                  |                |
| <b>ADMINISTRATIVE INFORMATION</b> |    |                                                                                                                                                                                                 |                                     |                                     |                |
| <b>Title</b>                      |    |                                                                                                                                                                                                 |                                     |                                     |                |
| Identification                    | 1a | Identify the report as a protocol of a systematic review                                                                                                                                        | <input checked="" type="checkbox"/> | <input type="checkbox"/>            | 1-2            |
| Update                            | 1b | If the protocol is for an update of a previous systematic review, identify as such                                                                                                              | <input type="checkbox"/>            | <input type="checkbox"/>            | NA             |
| <b>Registration</b>               | 2  | If registered, provide the name of the registry (e.g., PROSPERO) and registration number in the Abstract                                                                                        | <input checked="" type="checkbox"/> | <input type="checkbox"/>            | 64, 109        |
| <b>Authors</b>                    |    |                                                                                                                                                                                                 |                                     |                                     |                |
| Contact                           | 3a | Provide name, institutional affiliation, and e-mail address of all protocol authors; provide physical mailing address of corresponding author                                                   | <input checked="" type="checkbox"/> | <input type="checkbox"/>            | 6 - 36         |
| Contributions                     | 3b | Describe contributions of protocol authors and identify the guarantor of the review                                                                                                             | <input checked="" type="checkbox"/> | <input type="checkbox"/>            | 347 - 350      |
| <b>Amendments</b>                 | 4  | If the protocol represents an amendment of a previously completed or published protocol, identify as such and list changes; otherwise, state plan for documenting important protocol amendments | <input type="checkbox"/>            | <input type="checkbox"/>            | NA             |
| <b>Support</b>                    |    |                                                                                                                                                                                                 |                                     |                                     |                |
| Sources                           | 5a | Indicate sources of financial or other support for the review                                                                                                                                   | <input checked="" type="checkbox"/> | <input type="checkbox"/>            | 344-346        |
| Sponsor                           | 5b | Provide name for the review funder and/or sponsor                                                                                                                                               | <input checked="" type="checkbox"/> | <input type="checkbox"/>            | 344-346        |
| Role of sponsor/funder            | 5c | Describe roles of funder(s), sponsor(s), and/or institution(s), if any, in developing the protocol                                                                                              | <input type="checkbox"/>            | <input checked="" type="checkbox"/> |                |
| <b>INTRODUCTION</b>               |    |                                                                                                                                                                                                 |                                     |                                     |                |
| <b>Rationale</b>                  | 6  | Describe the rationale for the review in the context of what is already known                                                                                                                   | <input checked="" type="checkbox"/> | <input type="checkbox"/>            | 79-102         |

| Section/topic                             | #   | Checklist item                                                                                                                                                                                                                              | Information reported                |                                     | Line number(s)              |
|-------------------------------------------|-----|---------------------------------------------------------------------------------------------------------------------------------------------------------------------------------------------------------------------------------------------|-------------------------------------|-------------------------------------|-----------------------------|
|                                           |     |                                                                                                                                                                                                                                             | Yes                                 | No                                  |                             |
| <b>Objectives</b>                         | 7   | Provide an explicit statement of the question(s) the review will address with reference to participants, interventions, comparators, and outcomes (PICO)                                                                                    | <input checked="" type="checkbox"/> | <input type="checkbox"/>            | 103-104                     |
| <b>METHODS</b>                            |     |                                                                                                                                                                                                                                             |                                     |                                     |                             |
| <b>Eligibility criteria</b>               | 8   | Specify the study characteristics (e.g., PICO, study design, setting, time frame) and report characteristics (e.g., years considered, language, publication status) to be used as criteria for eligibility for the review                   | <input checked="" type="checkbox"/> | <input type="checkbox"/>            | 119-1128                    |
| <b>Information sources</b>                | 9   | Describe all intended information sources (e.g., electronic databases, contact with study authors, trial registers, or other grey literature sources) with planned dates of coverage                                                        | <input checked="" type="checkbox"/> | <input type="checkbox"/>            | 129-1144                    |
| <b>Search strategy</b>                    | 10  | Present draft of search strategy to be used for at least one electronic database, including planned limits, such that it could be repeated                                                                                                  | <input checked="" type="checkbox"/> | <input type="checkbox"/>            | Additional file 1           |
| <b>STUDY RECORDS</b>                      |     |                                                                                                                                                                                                                                             |                                     |                                     |                             |
| Data management                           | 11a | Describe the mechanism(s) that will be used to manage records and data throughout the review                                                                                                                                                | <input checked="" type="checkbox"/> | <input type="checkbox"/>            | 145-157                     |
| Selection process                         | 11b | State the process that will be used for selecting studies (e.g., two independent reviewers) through each phase of the review (i.e., screening, eligibility, and inclusion in meta-analysis)                                                 | <input checked="" type="checkbox"/> | <input type="checkbox"/>            | 130-144                     |
| Data collection process                   | 11c | Describe planned method of extracting data from reports (e.g., piloting forms, done independently, in duplicate), any processes for obtaining and confirming data from investigators                                                        | <input checked="" type="checkbox"/> | <input type="checkbox"/>            | 130-144                     |
| <b>Data items</b>                         | 12  | List and define all variables for which data will be sought (e.g., PICO items, funding sources), any pre-planned data assumptions and simplifications                                                                                       | <input checked="" type="checkbox"/> | <input type="checkbox"/>            | 159-170 + Additional file 2 |
| <b>Outcomes and prioritization</b>        | 13  | List and define all outcomes for which data will be sought, including prioritization of main and additional outcomes, with rationale                                                                                                        | <input checked="" type="checkbox"/> | <input type="checkbox"/>            | 159-170 + Additional file 2 |
| <b>Risk of bias in individual studies</b> | 14  | Describe anticipated methods for assessing risk of bias of individual studies, including whether this will be done at the outcome or study level, or both; state how this information will be used in data synthesis                        | <input checked="" type="checkbox"/> | <input type="checkbox"/>            | 159-185                     |
| <b>DATA</b>                               |     |                                                                                                                                                                                                                                             |                                     |                                     |                             |
| <b>Synthesis</b>                          | 15a | Describe criteria under which study data will be quantitatively synthesized                                                                                                                                                                 | <input type="checkbox"/>            | <input checked="" type="checkbox"/> |                             |
|                                           | 15b | If data are appropriate for quantitative synthesis, describe planned summary measures, methods of handling data, and methods of combining data from studies, including any planned exploration of consistency (e.g., $I^2$ , Kendall's tau) | <input checked="" type="checkbox"/> | <input type="checkbox"/>            | 219-261                     |



| Section/topic                            | #   | Checklist item                                                                                                              | Information reported                |                                     | Line number(s) |
|------------------------------------------|-----|-----------------------------------------------------------------------------------------------------------------------------|-------------------------------------|-------------------------------------|----------------|
|                                          |     |                                                                                                                             | Yes                                 | No                                  |                |
|                                          | 15c | Describe any proposed additional analyses (e.g., sensitivity or subgroup analyses, meta-regression)                         | <input checked="" type="checkbox"/> | <input type="checkbox"/>            | 262-270        |
|                                          | 15d | If quantitative synthesis is not appropriate, describe the type of summary planned                                          | <input type="checkbox"/>            | <input checked="" type="checkbox"/> |                |
| <b>Meta-bias(es)</b>                     | 16  | Specify any planned assessment of meta-bias(es) (e.g., publication bias across studies, selective reporting within studies) | <input checked="" type="checkbox"/> | <input type="checkbox"/>            | 178-185        |
| <b>Confidence in cumulative evidence</b> | 17  | Describe how the strength of the body of evidence will be assessed (e.g., GRADE)                                            | <input type="checkbox"/>            | <input checked="" type="checkbox"/> |                |

# BMJ Open

## Arthroscopic meniscectomy versus non-surgical or sham treatment in patients with MRI confirmed degenerative meniscus lesions: a protocol for an individual participant data meta-analysis

|                                 |                                                                                                                                                                                                                                                                                                                                                                                                                                                                                                                                                                                                                                                                                                                                                                                                                                                                                                                                                                                               |
|---------------------------------|-----------------------------------------------------------------------------------------------------------------------------------------------------------------------------------------------------------------------------------------------------------------------------------------------------------------------------------------------------------------------------------------------------------------------------------------------------------------------------------------------------------------------------------------------------------------------------------------------------------------------------------------------------------------------------------------------------------------------------------------------------------------------------------------------------------------------------------------------------------------------------------------------------------------------------------------------------------------------------------------------|
| Journal:                        | <i>BMJ Open</i>                                                                                                                                                                                                                                                                                                                                                                                                                                                                                                                                                                                                                                                                                                                                                                                                                                                                                                                                                                               |
| Manuscript ID                   | bmjopen-2019-031864.R3                                                                                                                                                                                                                                                                                                                                                                                                                                                                                                                                                                                                                                                                                                                                                                                                                                                                                                                                                                        |
| Article Type:                   | Protocol                                                                                                                                                                                                                                                                                                                                                                                                                                                                                                                                                                                                                                                                                                                                                                                                                                                                                                                                                                                      |
| Date Submitted by the Author:   | 22-Jan-2020                                                                                                                                                                                                                                                                                                                                                                                                                                                                                                                                                                                                                                                                                                                                                                                                                                                                                                                                                                                   |
| Complete List of Authors:       | Wijn, Stan; Radboudumc, Department of Operating Rooms Rovers, Maroeska; The Radboud University, Nijmegen Medical Centre, Rongen, Jan; Radboudumc, Operating rooms Østerås, Håvard; Norges Teknisk-Naturvitenskapelige Universitet Fakultet for Medisin og Helsevitenskap, Neuromedicine and Movement Science<br>Risberg, May Arna; Norwegian School of Sport Sciences, Department of Sports Medicine; Oslo universitetssykehus Ullevål, Division of Orthopedic Surgery, Department of Reserach<br>Roos, Ewa; Syddansk Universitet Det Sundhedsvidenskabelige Fakultet, Sports Science and Clinical Biomechanics<br>Hare, Kristoffer; Region Zealand, Department of Orthopedics, Slagelse Medical Hospital<br>van de Graaf, VA; Spaarne Gasthuis, Department of Orthopaedic Surgery, Joint Research<br>Poolman, Rudolf; Onze Lieve Vrouwe Gasthuis, Orthopaedic Surgery<br>Englund, Martin; Lund University, Dept of Orthopedics<br>Hannink, Gerjon; Radboudumc, Department of Operating Rooms |
| <b>Primary Subject Heading</b>: | Surgery                                                                                                                                                                                                                                                                                                                                                                                                                                                                                                                                                                                                                                                                                                                                                                                                                                                                                                                                                                                       |
| Secondary Subject Heading:      | Sports and exercise medicine                                                                                                                                                                                                                                                                                                                                                                                                                                                                                                                                                                                                                                                                                                                                                                                                                                                                                                                                                                  |
| Keywords:                       | Arthroscopic surgery, Meniscectomy, Osteoarthritis, Individual Participant Data Meta-Analysis, IPDMA                                                                                                                                                                                                                                                                                                                                                                                                                                                                                                                                                                                                                                                                                                                                                                                                                                                                                          |
|                                 |                                                                                                                                                                                                                                                                                                                                                                                                                                                                                                                                                                                                                                                                                                                                                                                                                                                                                                                                                                                               |

SCHOLARONE™  
Manuscripts



I, the Submitting Author has the right to grant and does grant on behalf of all authors of the Work (as defined in the below author licence), an exclusive licence and/or a non-exclusive licence for contributions from authors who are: i) UK Crown employees; ii) where BMJ has agreed a CC-BY licence shall apply, and/or iii) in accordance with the terms applicable for US Federal Government officers or employees acting as part of their official duties; on a worldwide, perpetual, irrevocable, royalty-free basis to BMJ Publishing Group Ltd ("BMJ") its licensees and where the relevant Journal is co-owned by BMJ to the co-owners of the Journal, to publish the Work in this journal and any other BMJ products and to exploit all rights, as set out in our [licence](#).

The Submitting Author accepts and understands that any supply made under these terms is made by BMJ to the Submitting Author unless you are acting as an employee on behalf of your employer or a postgraduate student of an affiliated institution which is paying any applicable article publishing charge ("APC") for Open Access articles. Where the Submitting Author wishes to make the Work available on an Open Access basis (and intends to pay the relevant APC), the terms of reuse of such Open Access shall be governed by a Creative Commons licence – details of these licences and which [Creative Commons](#) licence will apply to this Work are set out in our licence referred to above.

Other than as permitted in any relevant BMJ Author's Self Archiving Policies, I confirm this Work has not been accepted for publication elsewhere, is not being considered for publication elsewhere and does not duplicate material already published. I confirm all authors consent to publication of this Work and authorise the granting of this licence.

1  
2  
3  
4 1 **Arthroscopic meniscectomy versus non-surgical or sham treatment in patients with MRI confirmed**  
5  
6 2 **degenerative meniscus lesions: a protocol for an individual participant data meta-analysis**  
7

8 3 Stan R.W. Wijn<sup>1</sup>, Maroeska M. Rovers<sup>1</sup>, Jan J. Rongen<sup>1</sup>, Håvard Østerås<sup>2</sup>, May A. Risberg<sup>3</sup>, Ewa M. Roos<sup>4</sup>,  
9  
10 4 Kristoffer B. Hare<sup>5</sup>, Victor A. van de Graaf<sup>6</sup>, Rudolf W. Poolman<sup>6</sup>, Martin Englund<sup>7</sup>, Gerjon Hannink<sup>1</sup>  
11

12 5  
13  
14 6 <sup>1</sup> Radboud University Medical Center, Radboud Institute for Health Sciences, Department of Operating Rooms, Nijmegen, the Netherlands

15 7 <sup>2</sup> Norwegian University of Science and Technology, Faculty of Medicine and Health Sciences, Department of Neuromedicine and Movement  
16  
17 8 Science, Trondheim, Norway

18  
19 9 <sup>3</sup> Norwegian School of Sport Sciences, Department of Sport Medicine, and Division of Orthopedic Surgery, Oslo University Hospital, Oslo,  
20  
21 10 Norway

22 11 <sup>4</sup> University of Southern Denmark, Musculoskeletal Function and Physiotherapy and Center for Muscle and Joint Health, Department of  
23  
24 12 Sports and Clinical Biomechanics, Odense, Denmark

25 13 <sup>5</sup> University of Southern Denmark, Institute of Sports Science and Clinical Biomechanics, Department of Orthopedics, Odense, Denmark

26 14 <sup>6</sup> OLVG, Joint Research, Department of Orthopaedic Surgery, Amsterdam, the Netherlands

27 15 <sup>7</sup> Lund University, Faculty of Medicine, Department of Clinical Sciences Lund, Orthopaedics, Clinical Epidemiology Unit, Lund, Sweden  
28  
29  
30  
31

32 17 Stan R.W. Wijn<sup>1</sup>, Stan.Wijn@radboudumc.nl

33 18 Maroeska M. Rovers<sup>1</sup>, Maroeska.Rovers@radboudumc.nl

34 19 Jan J. Rongen<sup>1</sup>, Jan.Rongen@radboudumc.nl

35 20 Håvard Østerås<sup>2</sup>, Havard.Osteras@ntnu.no

36 21 May A. Risberg<sup>3</sup>, M.a.Risberg@nih.no

37 22 Ewa M. Roos<sup>4</sup>, ERoos@health.sdu.dk

38 23 Kristoffer B. Hare<sup>5</sup>, Kbh@regionsjaelland.dk

39 24 Victor A. van de Graaf<sup>6</sup>, vandeGraaf@gmail.com

40 25 Rudolf W. Poolman<sup>6</sup>, RWP@jointresearch.org

41 26 Martin Englund<sup>7</sup>, Martin.Englund@med.lu.se

42 27 Gerjon Hannink<sup>1</sup>, Gerjon.Hannink@radboudumc.nl  
43  
44  
45  
46  
47  
48

49 29 Physical mailing address of the corresponding author:

50  
51 30 Stan R.W. Wijn

52 31 Radboud university medical center

53 32 715 Department of Operating Rooms

54 33 P.O. Box 9101

55 34 6500 HB Nijmegen

56 35 The Netherlands  
57  
58

59 37 Word count: 3886  
60

1  
2  
3 38 **Abstract**

4  
5 39 **Introduction**

6  
7  
8 40 Arthroscopic partial meniscectomy (APM) after degenerative meniscus tears is one of the most frequently  
9  
10 41 performed surgeries in orthopedics. Although several randomized controlled trials (RCTs) have been published  
11  
12 42 that showed no clear benefit compared to sham treatment or non-surgical treatment, the incidence of APM  
13  
14 43 remains high. The common perception by most orthopedic surgeons is that there are subgroups of patients  
15  
16 44 that *do* need APM to improve, and they argue that each study sample of the existing trials is not representative  
17  
18 45 for the day-to-day patients in the clinic. Therefore, the objective of this individual participant data meta-  
19  
20 46 analysis (IPDMA) is to assess whether there are subgroups of patients with degenerative meniscus lesions who  
21  
22 47 benefit from APM in comparison with non-surgical or sham treatment.

23  
24  
25 48 **Methods and Analysis**

26  
27 49 An existing systematic review will be updated to identify all RCTs worldwide that evaluated APM compared to  
28  
29 50 sham- or non-surgical treatment in patients with knee symptoms and degenerative meniscus tears. Time and  
30  
31 51 effort will be spent in contacting principal investigators of the original trials and encourage them to collaborate  
32  
33 52 in this project by sharing their trial data. All individual participant data will be validated for missing data,  
34  
35 53 internal data consistency, randomization integrity and censoring patterns. After validation, all datasets will be  
36  
37 54 combined and analyzed using a one- and two-staged approach. The most important outcome will be the  
38  
39 55 difference between APM and control groups in knee pain, function and quality of life 2 years after the  
40  
41 56 intervention. Other outcomes of interest will include the difference in adverse events and mental health.

42  
43  
44 57 **Ethics and dissemination**

45  
46 58 All trial data will be anonymized before it is shared with the authors. The data will be encrypted and stored on  
47  
48 59 a secure server located in the Netherlands. No major ethical concerns remain. This IPDMA will provide the  
49  
50 60 evidence base to update and tailor diagnostic and treatment protocols as well as (international) guidelines for  
51  
52 61 patients for whom orthopedic surgeons consider APM. The results will be submitted for publication in a peer-  
53  
54 62 reviewed journal.

55  
56  
57 63 **Registration**

58  
59 64 Prospero registration number: CRD42017067240  
60

1  
2  
3 65 **Keywords**  
4

5  
6 66 Arthroscopic surgery; Meniscectomy; Osteoarthritis; Individual Participant Data Meta-Analysis; IPDMA  
7

8 67 **Article Summary**  
9

10 68 **Strengths and limitations of this study**

- 11  
12 69 • To our knowledge, this is the first study that combines the individual participant data of RCTs  
13  
14 70 performed on APM, maximizing the capability to detect subgroups that may benefit from the surgery.  
15  
16 71 • The main advantage of an IPDMA is that no large-scale RCT is required, but instead the power of  
17  
18 72 existing studies is combined to achieve large patient numbers.  
19  
20 73 • Trial data might not be available, not accessible or sharing is not possible due to a stringent informed  
21  
22 74 consent that only enables the use of the data for the original study. This might limit the amount of  
23  
24 75 trials we can include.  
25  
26 76 • We are dependent on the outcomes that have been used in the included studies. These can differ  
27  
28 77 between studies.  
29  
30  
31 78

## 79 **Background**

80 Arthroscopic partial meniscectomy (APM) is a regularly performed surgical procedure intended to treat  
81 symptoms believed to be caused by degenerative meniscus lesions. [1–3] Degenerative lesions are typically  
82 observed in middle-aged and older people, and are caused by chronic degenerative processes. [4,5] Over the  
83 past decade, evidence has accumulated that questions both the rationale for, and the effectiveness of APM for  
84 degenerative meniscus lesions. [6,7] Additionally, concerns have been expressed on the harms associated with  
85 the procedure [7–9] and the potential detrimental effect of the procedure on the progression of osteoarthritis.  
86 [10–12] Still, the number of surgical procedures performed in the treatment of degenerative meniscus lesions  
87 remains high. [13–17]

88 Orthopedic surgeons have expressed concerns about the generalizability of the trial results and point  
89 out that the study samples are not representative of the subjects they select for surgery in their day-to-day  
90 clinical practice.[18–24] The common perception by most surgeons is that there are subgroups of patients that  
91 *do* need the procedure to improve.[8] Hence, applying the mean effects of randomized controlled trials (RCTs)  
92 to individual patients in day-to-day practice runs against the intuitive approach of doctors to use the specific  
93 characteristics of a particular patient to tailor management accordingly. Unfortunately, the identification of  
94 subgroups of patients that may/may not benefit from the procedure has been problematic, as the individual  
95 trials performed so far were too small to perform valid and reliable subgroup analyses.

96 An individual participant data meta-analysis (IPDMA), i.e. a meta-analysis on the original individual  
97 participant data of previously performed trials, has been described as the gold standard of systematic review  
98 and meta-analysis. An IPDMA offers the unique opportunity to recode, and re-analyze all original trial data, and  
99 evaluate the effectiveness of surgical treatment of degenerative meniscus lesions and to identify potential  
100 subgroups more likely to benefit from the intervention. Identifying these subgroups can assist physicians to  
101 make personalized treatment decisions and thereby improving the overall quality of life of patients that are  
102 currently selected for APM.

103 Therefore, the objective of this IPDMA is to assess whether there are subgroups of patients with  
104 degenerative meniscus lesions who benefit from APM in comparison with non-surgical or sham treatment.

105

106

## 107 **Methods**

108 The protocol is reported according to the Preferred Reporting Items for Systematic Reviews and Meta-Analysis  
109 protocols (PRISMA-P) statement and is registered in PROSPERO with registration number: CRD42017067240.

110 [25] The first part of the method section describes a regular systematic review to identify eligible papers and  
111 invite the study authors to collaborate and contribute data. The second part describes the analysis with the  
112 individual participant data.

## 113 **Patient and Public Involvement**

114 Patients and members of the public were not involved in development of the protocol. A panel of patient  
115 representatives will provide detailed input regarding outcomes and the interpretation of the results from this  
116 IPDMA.

## 118 **Part 1: Identifying eligible papers & data collection**

### 119 **Eligibility criteria**

120 This IPDMA will include RCTs that evaluated the effectiveness of (partial) meniscectomy compared to non-  
121 surgical or sham treatments in persons with MRI-verified degenerative meniscus lesions. Degenerative  
122 meniscus lesions are typically observed in middle-aged and older people and may be the result of early  
123 degenerative knee disease. Persistent knee symptoms may encompass knee pain, limitation of function, and  
124 mechanical symptoms such as the sensation of catching or locking of the knee. Non-surgical or sham  
125 treatments may include, but are not limited to, sham surgery, pain and/or anti-inflammatory medication,  
126 exercise programs, and/or watchful waiting. Trials that included persons with traumatic meniscal lesions,  
127 defined as being the result of a specific traumatic incident will be excluded. There will be no restrictions on  
128 publication date, type of setting, length of follow up, or language.

### 129 **Identification and selection of eligible trials**

130 The search strategy described by Thorlund et al. [7] will be adopted to systematically search for eligible trials in  
131 Medline, Embase, CINAHL, Web of Science, and the Cochrane Central Register of Controlled Trials (CENTRAL).  
132 (Additional file 1) The identified studies will be exported to EROS (Early Review Organizing Software, developed  
133 by Institute of Clinical Effectiveness and Health Policy, Buenos Aires, Argentina) to remove duplicates, and



1  
2  
3 134 randomly allocate references to two independent reviewers responsible for screening and selection. The two  
4  
5 135 reviewers will independently screen all titles and abstracts of identified reports for eligibility. Full-text copies of  
6  
7 136 all publications regarded as potentially eligible for inclusion, or where there is any uncertainty, will  
8  
9 137 subsequently be assessed. Trials will be included when they meet the eligibility criteria. Any discrepancies  
10  
11 138 between reviewers will be resolved by discussion, and if necessary, a third reviewer will be consulted. In  
12  
13 139 addition, the reference lists of included studies will be reviewed to identify additional eligible trials. The  
14  
15 140 electronic database search will be supplemented by searching for additional eligible trials in the World Health  
16  
17 141 Organization International Clinical Trials Registry Platform (WHO ICTRP) search portal, which contains the trial  
18  
19 142 registration datasets provided by several registries. This portal includes 16 national and international primary  
20  
21 143 registries, including ClinicalTrials.gov, ANZCTR, JPRN, and ISRCTN. The corresponding authors of eligible trials  
22  
23 144 will be invited to collaborate in the current IPDMA by sharing their data.

#### 25 26 145 **Collection of individual participant data**

#### 27 28 146 **Data collection and transfer**

29  
30  
31 147 Time and effort will be spent in tracing and encouraging original investigators to share their trial data. If no  
32  
33 148 reply is received on a first invitation, additional inquiries will be sent, including inquiries sent to alternative  
34  
35 149 email addresses identified for the corresponding author, inquiries sent to listed co-authors, and to the  
36  
37 150 institution of the corresponding author listed in the original publication. The principal investigators of the  
38  
39 151 original trials collaborating in the current project will be encouraged to actively participate in the IPDMA and  
40  
41 152 discuss and finalize the definitions and outcomes to be assessed and the analytical processes proposed. Where  
42  
43 153 possible, a face-to-face collaborator meeting will be scheduled, at which key decisions, including the project  
44  
45 154 design, analysis plan, and interpretation of findings will be discussed. Before sharing of the de-identified data,  
46  
47 155 we will sign a data sharing agreement with those principal investigators of the original trials that are interested  
48  
49 156 in collaboration, in which we will arrange that the research data will be used for the declared purposes and the  
50  
51 157 data will be stored on secured servers located in the Netherlands.

#### 52 53 54 158 **Data check and risk of bias**

55  
56 159 All received data will first be validated to match the results of the original publication. Statistical tests will be  
57  
58 160 repeated and analyzed in R (R Foundation for Statistical Computing, Vienna, Austria). The trial data provided by  
59  
60

1  
2  
3 161 original investigators will be checked for consistency, plausibility, integrity of randomization, and  
4  
5 162 reproducibility of published trial results. The aims of checking data are to increase the probability that data  
6  
7 163 supplied are accurate, and to confirm that trials were appropriately randomized. Inconsistencies will be  
8  
9 164 discussed and resolved with the individual investigators. All checked and de-identified data of randomized  
10  
11 165 participants will be entered into a pooled database, and every trial will be assigned a trial number. Data will  
12  
13 166 include characteristics relating to the participants (age, gender, body mass index (BMI)); radiographic  
14  
15 167 information on knee osteoarthritis; onset, duration, and severity of symptoms; generic and disease-specific  
16  
17 168 health-related quality-of-life); non-surgical or sham procedure; trial (sample size, setting, allocation  
18  
19 169 concealment); and outcome measures of interest. For eligible trials of which original data is not available the  
20  
21 170 aggregated data from trial reports will be collected.

22  
23 171         Checking the IPD directly can provide more reliable investigations of key potential biases, some of  
24  
25 172 which might be reduced or alleviated in the process. The risk of bias in included trials will be independently  
26  
27 173 assessed by checking the IPD directly. Randomization and allocation concealment will be assessed by checking  
28  
29 174 if both treatment arms are balanced in every study.[26] The advantage of an IPDMA is that we can also include  
30  
31 175 outcomes not reported by the original journal article, possibly reducing outcome reporting bias by checking all  
32  
33 176 relevant outcomes at the same time. In order to avoid ecological bias, the within-trial information will be  
34  
35 177 examined for individual predictors of treatment effect, separately from the across-trial information.[27]

36  
37 178         The potential for publication bias and small study effects will be examined, in the context of visual  
38  
39 179 inspection, using a contour-enhanced funnel plot.[28,29] To avoid availability bias, aggregated data from  
40  
41 180 studies lacking individual participant data will be used to consider their potential impact.

42  
43 181         To enable to assessment of homogeneity/heterogeneity between the included trials, the following  
44  
45 182 characteristics of the included RCTs will be compared and described in a table: 1) selection of participants, 2)  
46  
47 183 previous (conservative) treatment(s) before randomization, 2) inclusion- and exclusion criteria, 3) description  
48  
49 184 of clinical path prior to inclusion, 4) number of participants that declined participation, 5) diagnostic  
50  
51 185 characteristics, including traumatic or non-traumatic injury and presence or absence of osteoarthritis, 6) work  
52  
53 186 characteristics, 7) socioeconomic characteristics, 8) intervention and control treatment, 9) cross-over, 10)  
54  
55 187 adherence to the intervention in both treatment arms, 11) other health care services during follow-up, and 12)  
56  
57 188 outcome measures. These study characteristics will be used to assess which trials can enter the meta-analysis  
58  
59 189 and to determine the generalizability of the results.

### 190 **Missing data**

191 The final IPDMA dataset will have a multilevel (i.e. clustered) structure, where the individual trials are the levels  
192 (i.e. clusters). A foreseen feature of this dataset will be that some variables will be systematically missing, that  
193 is missing for all individuals in one or more trials. Next to systematically missing variables, we may also  
194 encounter sporadically missing variables, that is missing for some but not all individuals in one or more trials.

195 In order to optimally use the available participant data, reduce bias, and to increase statistical efficiency,  
196 incomplete data will be imputed using imputation methods that handle both systematically and sporadically  
197 missing covariates in a two-level structure using hierarchical multiple imputations by chained equations (MICE).  
198 [30–33]

### 199 **Outcomes variables**

200 The most important outcomes according to surgeons and patients is treatment effect, determined as the  
201 difference between the intervention (surgery) and control group (non-surgical treatment) in knee pain,  
202 function and quality of life 2 years after the intervention. The preferred outcome measure instrument will be  
203 the Knee injury and Osteoarthritis Outcome Scale (KOOS). The KOOS is an instrument developed with the  
204 purpose of evaluating short-term and long-term symptoms and function in subjects with a knee injury and  
205 osteoarthritis. The KOOS consists of 5 subscales: pain, other symptoms, function in daily living, function in sport  
206 and recreation, and knee-related quality of life and a composite score can be calculated (referred to as the  
207 KOOS5). The KOOS has been validated for several orthopedic interventions such as anterior cruciate ligament  
208 reconstruction, meniscectomy and total knee replacement. [34] The score of the KOOS pain subscales will be  
209 compared between the intervention and control group across the included studies. Other measurement  
210 instrument targeted at quantifying pain will be standardized and combined in one single pain outcome. The  
211 functional outcome will be measured by using the KOOS function subscale or equivalent outcome aimed to  
212 measure function. The health quality of life will be measured by using the EuroQol-5 dimensions (EQ5D)  
213 questionnaire or the 36-Item Short Form Survey (SF-36).

214 Other outcomes of interest will include the difference between intervention and control group in adverse  
215 events (defined as deep venous thrombosis, pulmonary thromboembolism, venous thromboembolism,  
216 infection, and death) associated with the intervention from baseline to 2 years after intervention; difference in  
217 mental health; difference in risk for future knee replacement surgery between groups (feasibility will depend

1  
2  
3 218 on whether the follow up of the trials will be long enough to capture the events), and the effect of follow-up  
4  
5 219 time after the intervention on the treatment effect.  
6

## 7 220 **Part 2: Analysis**

### 8 221 **Treatment effect**

9  
10  
11  
12 222 The IPDMA will be used to assess the general effectiveness of APM in comparison with non-surgical or sham  
13  
14 223 treatments in patients with knee symptoms and degenerative meniscal lesions. For this part, we will apply both  
15  
16 224 a two-stage and one-stage approach.[35] In the two-stage approach, we will perform regression analyses for  
17  
18 225 each study to obtain effect estimates separately. Thereafter these are pooled in a random effects model (to  
19  
20 226 account for heterogeneity) like a regular meta-analysis. The random effects models in the two-stage will be  
21  
22 227 analyzed using the restricted maximum likelihood (REML) approach with the Hartung-Knapp-Sidik-Jonkman  
23  
24 228 method for continuous outcomes to account for uncertainty due to heterogeneity.[36] The two-stage approach  
25  
26 229 is ideal for assessing pooled treatment effect and detect heterogeneity. However, it is difficult to detect non-  
27  
28 230 linear trends or account for correlating covariates.

29  
30  
31 231 In the one-stage approach, the IPD from all studies will be analyzed simultaneously by adopting a  
32  
33 232 single statistical model (random effects model) that fully accounts for heterogeneity across studies whilst  
34  
35 233 accounting for the clustering of participants within studies. The one-stage approach is more flexible and more  
36  
37 234 exact compared to the two-stage but can face computational difficulties. Therefore, the results from the one-  
38  
39 235 stage will be compared to the results of the two-stage and differences will be investigated. The random effects  
40  
41 236 models in the one-stage will be analyzed using the REML approach with the Kenward-Rogers approach for  
42  
43 237 continuous outcome and the maximum likelihood method (ML) with quadrature for binary or survival  
44  
45 238 outcomes.[35,37,38] Heterogeneity will be addressed by  $I^2$  and  $\tau^2$ , reflecting the heterogeneity between  
46  
47 239 studies. To reflect the variation of the treatment effect in a different setting, 95% prediction intervals will be  
48  
49 240 reported to provide more information on the expected effect in future patients.[39]

50  
51 241 A key advantage of a one-stage approach is the flexibility in terms of the models that may be fitted  
52  
53 242 compared to a two-stage approach. One-stage models allow for the inclusion of multiple covariates in a single  
54  
55 243 model, multiple random-effects on different parameters, correlation between covariates and the separation of  
56  
57 244 within and across-trials information. It is this flexibility that is essential to the primary objective of this IPDMA.  
58  
59 245 [40]  
60

### 246 **Heterogeneity in treatment effect (subgroups)**

247 To investigate which patients may benefit from (partial) meniscectomy we will assess whether the treatment  
248 effect is modified by baseline patient characteristics. First, relevant baseline patient characteristics will be  
249 identified. Modern regression procedures with penalization of estimated regression coefficients will be applied  
250 for the selection of those characteristics that are independent predictors of the treatment effect.[41,42] A full  
251 list of the baseline patient characteristics that will be taken into consideration are listed in Additional file 2.  
252 Second, it will be assessed whether these identified independent baseline predictors, (individually or in  
253 combinations) modify the treatment effect. Effect modification will be assessed with a random effects model.  
254 In this model, a dummy for the particular study will be the random effect and APM (yes vs. no), the potential  
255 effect modifier, and an interaction term (APM \* potential effect modifier) will be included as fixed variables  
256 and the treatment effect as dependent variables.[33] The illustrated approach will allow assessment of effect  
257 modification without overfitting the data and reducing the risk of type I errors.

258 In addition, we want to ensure that patient characteristics deemed to be of high clinical relevance in day-  
259 to-day clinical practice are ultimately evaluated for effect modification. For this purpose, alongside the  
260 procedure described above, we will also assess a set of predefined patient characteristics deemed to be of high  
261 clinical relevance for effect modification. To define these characteristics the IPDMA collaborators will be asked  
262 to provide a top-3 of characteristics that they regard as most clinically relevant. Subsequently, it will be  
263 assessed whether the overall top-3 of these predefined patient characteristics modify the treatment effect.  
264 Predefining these characteristics will be performed before actual analysis of the data.

### 265 **Sensitivity analysis**

266 To analyze the robustness of the results from the IPDMA, several sensitivity analyses will be performed. First,  
267 to evaluate the impact of including aggregated data of published trials (of which the IPD was not available in  
268 the meta-analysis), analyses will be performed in which we either only include studies with IPD available or  
269 only studies of which only aggregated data was available. Second, to determine the effect of imputation of  
270 missing values on the study outcome, analyses will be performed in which we impute either only systematic  
271 missing variables, only sporadically missing variables (within trials) or not impute at all. Third, we will study  
272 whether the persistence of complains is a relevant subgrouping variable.

273 All analyses will be performed according to the intention-to-treat principle.

1  
2  
3 274 **Publication considerations**  
4

5  
6 275 The draft version of the final manuscript will be circulated among the collaborators for further discussion prior  
7  
8 276 to submission for publication. The authors of the IPDMA paper(s) will be the project team managing the  
9  
10 277 IPDMA, followed by the collaborators, whom are the principal investigators that collaborated in the current  
11  
12 278 project by sharing their trial data and commenting upon the results and draft of the papers.  
13

14  
15 279 **Study status**  
16

17  
18 280 Currently, we are collecting the data and are contacting the original investigators of the included trials and  
19  
20 281 encourage them to share the trial data. We have already received a part of the data and are still waiting on the  
21  
22 282 data of a few trials. We expect to end data collection in Q1 2020. After validation of the data, we will start with  
23  
24 283 the analyses. Our aim is to publish our results in 2020/2021.  
25

26 284  
27  
28 285 **Discussion**  
29

30  
31 286 In the last decade, several RCTs found no or very little benefit of APM compared to non-operative or sham  
32  
33 287 treatment in patients with MRI confirmed degenerative meniscus tears,[43–52] although there is some  
34  
35 288 evidence that it is effective in middle-aged patients with degenerative meniscal symptoms.[53] These findings  
36  
37 289 started a discussion on the effectiveness of the surgery and the methodology used in those RCTs by both  
38  
39 290 orthopedic surgeons and other health care professionals.[19–23,54] The published studies were not able to  
40  
41 291 adequately tease out whether or not there are subgroups that do additionally benefit from APM. This has  
42  
43 292 resulted in a deadlock: APM is continued to be performed, despite Level I evidence that discourage the  
44  
45 293 treatment.[13]

46  
47 294 The proposed IPDMA provides the opportunity to evaluate the relationship between potential  
48  
49 295 clinically-relevant baseline characteristics and the effectiveness of the APM of all patients that have been  
50  
51 296 included in the trials, and to possibly detect subgroups that may benefit from APM. IPDMA is the gold standard  
52  
53 297 of systematic review and meta-analysis that provides more power and is less prone to bias compared to meta-  
54  
55 298 analysis on aggregated data. To our knowledge, this is the first study that combines the individual participant  
56  
57 299 data of RCTs performed on APM, maximizing the capability to detect subgroups that may benefit from the  
58  
59 300 surgery. The main advantage of an IPDMA is that no large-scale RCT is required, but instead the power of  
60

1  
2  
3 301 existing studies is combined to achieve large patient numbers. This prevents additional trials and patient  
4  
5 302 involvement. Moreover, combining individual patient data enables us to analyze the effects of within-study and  
6  
7 303 between-study moderators of effect sizes, even though the original studies were too small to analyze such  
8  
9 304 samples.

10  
11 305 Although IPDMA is the best method to detect possible subgroups, performing an IPDMA also comes  
12  
13 306 with several challenges. First, all individual patient data from the eligible trials have to be collected. This time-  
14  
15 307 intensive task often requires us to contact the principal investigators multiple times to invite them to  
16  
17 308 collaborate. Unfortunately, data is sometimes not available, not accessible or sharing is not possible due to a  
18  
19 309 stringent informed consent that only enables the use of the data for the original study. While there are guiding  
20  
21 310 principles for open data management and sharing (Findable, Accessible, Interoperable and Reusable data  
22  
23 311 principles (FAIR principles)) these often conflict with the rules of the informed consent or national legislations,  
24  
25 312 creating a tension between privacy and reuse of (anonymous) medical data.[55] This might limit number of  
26  
27 313 studies that can be included in this IPDMA. Second, there are multiple ways to measure knee pain, knee  
28  
29 314 function or general quality of life. Every researcher can or will use their own set of outcome parameters,  
30  
31 315 dependent on the experience of the researcher with a certain questionnaire/scoring system, preference or the  
32  
33 316 time-dependent academic insights of the optimal questionnaire/scoring system (especially if studies have been  
34  
35 317 published in different time periods, i.e. different research paradigm). As a result, we are dependent on the  
36  
37 318 outcomes that have been used in the included studies in the IPDMA and cause systematic missing variables in  
38  
39 319 the final pooled dataset of an IPDMA. These missing variables pose a methodological challenge, because they  
40  
41 320 require advanced imputation that preserve the hierarchical structure of the data followed by the one-stage  
42  
43 321 meta-analysis.[56]

44  
45 322 In conclusion, the aim of this project is to identify potential subgroups of patients with degenerative  
46  
47 323 meniscus lesions who may benefit from APM. It will provide the evidence base to update and tailor diagnostic  
48  
49 324 and treatment protocols as well as (international) guidelines for patients for whom orthopedic surgeons  
50  
51 325 consider APM. Identifying potential subgroups can improve the quality of life of patients who *do* truly benefit  
52  
53 326 from the treatment, and can perhaps be implemented with a clinical decision aid. In case we do not find a  
54  
55 327 subgroup that has additional benefits from the treatment, it can help to reduce the number of APMs, and thus  
56  
57 328 less risk of, e.g. complications.[9,57]

58  
59  
60 329

1  
2  
3 330 **List of abbreviations**  
4

|    |           |                                                                              |
|----|-----------|------------------------------------------------------------------------------|
| 5  | APM       | Arthroscopic partial meniscectomy                                            |
| 6  | RCT       | Randomized controlled trial                                                  |
| 7  | IPDMA     | Individual participant data meta-analysis                                    |
| 8  | PRISMA-P  | Preferred Reporting Items for Systematic Reviews and Meta-Analysis protocols |
| 9  | CENTRAL   | Cochrane Central Register of Controlled Trials                               |
| 10 | EROS      | Early Review Organizing Software                                             |
| 11 | WHO ICTRP | World Health Organization International Clinical Trials Registry Platform    |
| 12 | BMI       | Body mass index                                                              |
| 13 | MICE      | Multiple imputations by chained equations                                    |
| 14 | KOOS      | Knee injury and Osteoarthritis Outcome Scale                                 |
| 15 | EQ5D      | EuroQol-5 dimensions questionnaire                                           |
| 16 | SF-36     | 36-Item Short Form Survey                                                    |
| 17 | REML      | Restricted maximum likelihood                                                |
| 18 | ML        | Maximum likelihood                                                           |
| 19 | FAIR      | Findable, Accessible, Interoperable and Reusable data principles             |

20  
21  
22  
23  
24  
25  
26  
27  
28  
29 331

30  
31  
32 332 **Declarations**  
33

34 333 **Ethics approval and consent to participate**  
35

36  
37 334 All principal investigators provided written confirmation that all participants included in the original trials had  
38  
39 335 given informed consent.

40  
41 336 **Consent for publication**  
42

43  
44 337 Not applicable  
45

46 338 **Availability of data and material**  
47

48  
49 339 Following the ICMJE's data sharing statement policy, de-identified individual participant data will be made  
50  
51 340 available at the end of the research project, including the study protocol, beginning 9 months and ending 36  
52  
53 341 months following article publication. The data will be shared with investigators whose proposed use of the data  
54  
55 342 has been approved by a review committee to be identified for this purpose. Proposals may be submitted up to  
56  
57 343 36 months following article publication. After 36 months the data will be available in our University's data  
58  
59 344 warehouse without investigator support other than deposited metadata.  
60



1  
2  
3 345 **Competing interests**  
4

5 346 The authors declare that they have no competing interest  
6  
7

8 347 **Funding**  
9

10 348 Junior Research project (2018) grant provided by the Radboud Institute for Health Sciences, Radboud  
11  
12 349 University Medical Center, Nijmegen, The Netherlands.  
13  
14

15 350 **Authors' contributions**  
16

17  
18 351 JR, GH, and MR conceived the idea for the review, with inputs from HØ, MR, ER, KH, VG, RP, and ME. SW, MR,  
19  
20 352 JR and GH designed and drafted the protocol. All authors (SW, MR, JR, HØ, MR, ER, KH, VG, RP, ME, and GH)  
21  
22 353 contributed to subsequent revisions and approved the protocol prior to its submission. GH is the guarantor.  
23

24 354 **Acknowledgements**  
25

26  
27 355 None  
28  
29 356  
30

31 357 **References**  
32

- 33  
34 358 1. Abrams GD, Frank RM, Gupta AK, Harris JD, McCormick FM, Cole BJ. Trends in meniscus repair and  
35  
36 359 meniscectomy in the United States, 2005-2011. *Am. J. Sports Med.* 2013;41(10):2333–9.  
37  
38 360 2. Cullen KA, Hall MJ, Golosinskiy A. Ambulatory surgery in the United States, 2006. *Natl. Health Stat.*  
39  
40 361 *Report.* 2009;(11):1–25.  
41  
42 362 3. Roos E, Lohmander S. [Young patients--old knees. Knee problems in the middle age often  
43  
44 363 osteoarthritis]. *Lakartidningen.* 2009;106(24–25):1645–8.  
45  
46 364 4. Buchbinder R, Harris IA, Sprowson A. Management of degenerative meniscal tears and the role of  
47  
48 365 surgery. *Br. J. Sports Med.* 2016;50(22):1413–6.  
49  
50 366 5. Englund M, Roemer FW, Hayashi D, Crema MD, Guermazi A. Meniscus pathology, osteoarthritis and the  
51  
52 367 treatment controversy. *Nat. Rev. Rheumatol.* 2012;8(7):412–9.  
53  
54 368 6. Khan M, Evaniew N, Bedi A, Ayeni OR, Bhandari M. Arthroscopic surgery for degenerative tears of the  
55  
56 369 meniscus: A systematic review and meta-analysis. *Cmaj.* 2014;186(14):1057–64.  
57  
58 370 7. Thorlund JB, Juhl CB, Roos EM, Lohmander LS. Arthroscopic surgery for degenerative knee: Systematic  
59  
60

- 1  
2  
3 371 review and meta-analysis of benefits and harms. *Br. J. Sports Med.* 2015;49(19):1229–35.  
4  
5 372 8. Englund M. Bout of the corner men and not the boxers? Contextual effects flex their muscles. *Ann*  
6  
7 373 *Rheum Dis Mon.* 2018;77(2).  
8  
9 374 9. Abram SGF, Judge A, Beard DJ, Price AJ. Adverse outcomes after arthroscopic partial meniscectomy: a  
10  
11 375 study of 700 000 procedures in the national Hospital Episode Statistics database for England. *Lancet.*  
12  
13 376 2018;392(10160):2194–202.  
14  
15 377 10. Hawker G, Guan J, Judge A, Dieppe P. Knee arthroscopy in England and Ontario: Patterns of use,  
16  
17 378 changes over time, and relationship to total knee replacement. *J. Bone Jt. Surg. - Ser. A.*  
18  
19 379 2008;90(11):2337–45.  
20  
21 380 11. Roemer FW, Kwok CK, Hannon MJ, Hunter DJ, Eckstein F, Grago J, et al. Partial meniscectomy is  
22  
23 381 associated with increased risk of incident radiographic osteoarthritis and worsening cartilage damage in  
24  
25 382 the following year. *Eur. Radiol.* 2017;27(1):404–13.  
26  
27 383 12. Rongen JJ, Rovers MM, van Tienen TG, Buma P, Hannink G. Increased risk for knee replacement surgery  
28  
29 384 after arthroscopic surgery for degenerative meniscal tears: a multi-center longitudinal observational  
30  
31 385 study using data from the osteoarthritis initiative. *Osteoarthr. Cartil.* 2017;25(1):23–9.  
32  
33 386 13. Rongen JJ, van Tienen TG, Buma P, Hannink G. Meniscus surgery is still widely performed in the  
34  
35 387 treatment of degenerative meniscus tears in The Netherlands. *Knee Surgery, Sport. Traumatol.*  
36  
37 388 *Arthrosc.* 2018;26(4):1123–9.  
38  
39 389 14. Thorlund JB, Hare KB, Lohmander LS. Large increase in arthroscopic meniscus surgery in the middle-  
40  
41 390 aged and older population in Denmark from 2000 to 2011. *Acta Orthop.* 2014;85(3):287–92.  
42  
43 391 15. Lazic S, Boughton O, Hing C, Bernard J. Arthroscopic washout of the knee: A procedure in decline. *Knee.*  
44  
45 392 2014;21(2):631–4.  
46  
47 393 16. Mattila VM, Sihvonen R, Paloneva J, Felländer-Tsai L. Changes in rates of arthroscopy due to  
48  
49 394 degenerative knee disease and traumatic meniscal tears in Finland and Sweden. *Acta Orthop.*  
50  
51 395 2016;87(1):5–11.  
52  
53 396 17. Kim S, Bosque J, Meehan JP, Jamali A, Marder R. Increase in outpatient knee arthroscopy in the United  
54  
55 397 States: A comparison of national surveys of ambulatory surgery, 1996 and 2006. *J. Bone Jt. Surg. - Ser.*  
56  
57 398 *A.* 2011;93(11):994–1000.  
58  
59 399 18. Jevsevar DS, Yates AJ, Sanders JO. Arthroscopic Partial Meniscectomy for Degenerative Meniscal Tear.

- 1  
2  
3 400 N. Engl. J. Med. 2014;370(13):1259–61.  
4  
5 401 19. Elattrache N, Lattermann C, Hannon M, Cole B. New England Journal of Medicine article evaluating the  
6  
7 402 usefulness of Meniscectomy is flawed. *Arthrosc. - J. Arthrosc. Relat. Surg.* 2014;30(5):542–3.  
8  
9 403 20. Lattermann C, Gomoll A, Cole B. Arthroscopic Partial Meniscectomy for Degenerative Meniscal Tear. *N.*  
10  
11 404 *Engl. J. Med.* 2014;370(13):1259–61.  
12  
13 405 21. Krych A, Stuart M LB. Arthroscopic Partial Meniscectomy for Degenerative Meniscal Tear. *N. Engl. J.*  
14  
15 406 *Med.* 2014;370(13):1259–61.  
16  
17 407 22. Lubowitz JH, D’Agostino RB, Provencher MT, Rossi MJ, Brand JC. Can We Trust Knee Meniscus Studies?  
18  
19 408 One-Way Crossover Confounds Intent-to-Treat Statistical Methods. *Arthroscopy.* 2016;32(11):2187–90.  
20  
21 409 23. McIntyre LF. Making Sure the Media Gets It Right on Orthopaedic Research. *Arthrosc. - J. Arthrosc.*  
22  
23 410 *Relat. Surg.* 2016;32(11):2416–7.  
24  
25 411 24. Katz JN, Wright J, Spindler KP, Mandl LA, Safran-Norton CE, Reinke EK, et al. Predictors and outcomes of  
26  
27 412 crossover to surgery from physical therapy for meniscal tear and osteoarthritis a randomized trial  
28  
29 413 comparing physical therapy and surgery. *J. Bone Jt. Surg. - Am. Vol.* 2016;98(22):1890–6.  
30  
31 414 25. Moher D, Shamseer L, Clarke M, Ghersi D, Liberati A, Petticrew M, et al. Preferred reporting items for  
32  
33 415 systematic review and meta-analysis protocols (PRISMA-P) 2015 statement. *Syst. Rev.* 2015;4:1.  
34  
35 416 26. Tierney JF, Vale C, Riley R, Smith CT, Stewart L, Clarke M, et al. Individual participant data (IPD)  
36  
37 417 metaanalyses of randomised controlled trials: Guidance on their use. *PLoS Med.* 2015;12(7).  
38  
39 418 27. Hua H, Burke DL, Crowther MJ, Ensor J, Tudur Smith C, Riley RD. One-stage individual participant data  
40  
41 419 meta-analysis models: estimation of treatment-covariate interactions must avoid ecological bias by  
42  
43 420 separating out within-trial and across-trial information. *Stat. Med.* 2017;36(5):772–89.  
44  
45 421 28. Sterne JAC, Sutton AJ, Ioannidis JPA, Terrin N, Jones DR, Lau J, et al. Recommendations for examining  
46  
47 422 and interpreting funnel plot asymmetry in meta-analyses of randomised controlled trials. *BMJ.*  
48  
49 423 2011;343(7818):d4002.  
50  
51 424 29. Peters JL, Sutton AJ, Jones DR, Abrams KR, Rushton L. Contour-enhanced meta-analysis funnel plots  
52  
53 425 help distinguish publication bias from other causes of asymmetry. *J. Clin. Epidemiol.* 2008;61(10):991–  
54  
55 426 6.  
56  
57 427 30. Resche-Rigon M, White IR. Multiple imputation by chained equations for systematically and  
58  
59 428 sporadically missing multilevel data. *Stat. Methods Med. Res.* 2018;27(6):1634–49.

- 1  
2  
3 429 31. Jolani S, Debray TPA, Koffijberg H, van Buuren S, Moons KGM. Imputation of systematically missing  
4  
5 430 predictors in an individual participant data meta-analysis: A generalized approach using MICE. *Stat.*  
6  
7 431 *Med.* 2015;34(11):1841–63.  
8  
9 432 32. Burgess S, White IR, Resche-Rigon M, Wood AM. Combining multiple imputation and meta-analysis  
10  
11 433 with individual participant data. *Stat. Med.* 2013;32(26):4499–514.  
12  
13 434 33. Debray TPA, Moons KGM, van Valkenhoef G, Efthimiou O, Hummel N, Groenwold RHH, et al. Get real in  
14  
15 435 individual participant data (IPD) meta-analysis: A review of the methodology. *Res. Synth. Methods.*  
16  
17 436 2015;6(4):293–309.  
18  
19 437 34. Rongen JJ, Hannink G. Comparison of registered and published primary outcomes in randomized  
20  
21 438 controlled trials of orthopaedic surgical interventions. *J. Bone Jt. Surg. - Am. Vol.* 2016;98(5):403–9.  
22  
23 439 35. Burke DL, Ensor J, Riley RD. Meta-analysis using individual participant data: one-stage and two-stage  
24  
25 440 approaches, and why they may differ. *Stat. Med.* 2017;36(5):855–75.  
26  
27 441 36. Knapp G, Hartung J. Improved tests for a random effects meta-regression with a single covariate. *Stat.*  
28  
29 442 *Med.* 2003;22(17):2693–710.  
30  
31 443 37. Turner RM, Omar RZ, Yang M, Goldstein H, Thompson SG. A multilevel model framework for meta-  
32  
33 444 analysis of clinical trials with binary outcomes. *Stat. Med.* 2000;19(24):3417–32.  
34  
35 445 38. Higgins JPT, Whitehead A, Turner RM, Omar RZ, Thompson SG. Meta-analysis of continuous outcome  
36  
37 446 data from individual patients. *Stat. Med.* 2001;20(15):2219–41.  
38  
39 447 39. IntHout J, Ioannidis JPA, Rovers MM, Goeman JJ. Plea for routinely presenting prediction intervals in  
40  
41 448 meta-analysis. *BMJ Open.* 2016;6(7):e010247.  
42  
43 449 40. Stewart GB, Altman DG, Askie LM, Duley L, Simmonds MC, Stewart LA. Statistical Analysis of Individual  
44  
45 450 Participant Data Meta-Analyses: A Comparison of Methods and Recommendations for Practice. *PLoS*  
46  
47 451 *One.* 2012;7(10):e46042.  
48  
49 452 41. Steyerberg EW. *Clinical Prediction Models: A Practical Approach to Development, Validation, and*  
50  
51 453 *Updating.* New York, NY: Springer New York; 2009.  
52  
53 454 42. Steyerberg EW, Uno H, Ioannidis JPA, van Calster B, Ukaegbu C, Dhingra T, et al. Poor performance of  
54  
55 455 clinical prediction models: the harm of commonly applied methods. *J. Clin. Epidemiol.* 2018;98:133–43.  
56  
57 456 43. Biedert RM. Treatment of intrasubstance meniscal lesions: a randomized prospective study of four  
58  
59 457 different methods. *Knee Surgery, Sport. Traumatol. Arthrosc.* 2000;8(2):104–8.

- 1  
2  
3 458 44. Herrlin S, Hållander M, Wange P, Weidenhielm L, Werner S. Arthroscopic or conservative treatment of  
4  
5 459 degenerative medial meniscal tears: A prospective randomised trial. *Knee Surgery, Sport. Traumatol.*  
6  
7 460 *Arthrosc.* 2007;15(4):393–401.  
8  
9 461 45. Katz JN, Brophy RH, Chaisson CE, de Chaves L, Cole BJ, Dahm DL, et al. Surgery versus Physical Therapy  
10  
11 462 for a Meniscal Tear and Osteoarthritis. *N. Engl. J. Med.* 2013;368(18):1675–84.  
12  
13 463 46. Kise NJ, Risberg MA, Stensrud S, Ranstam J, Engebretsen L, Roos EM. Exercise therapy versus  
14  
15 464 arthroscopic partial meniscectomy for degenerative meniscal tear in middle aged patients: Randomised  
16  
17 465 controlled trial with two year follow-up. *BMJ.* 2016;354.  
18  
19 466 47. Østerås H, Østerås B, Torstensen TA. Medical exercise therapy, and not arthroscopic surgery, resulted  
20  
21 467 in decreased depression and anxiety in patients with degenerative meniscus injury. *J. Bodyw. Mov.*  
22  
23 468 *Ther.* 2012;16(4):456–63.  
24  
25 469 48. Sihvonen R, Paavola M, Malmivaara A, Itälä A, Joukainen A, Nurmi H, et al. Arthroscopic Partial  
26  
27 470 Meniscectomy versus Sham Surgery for a Degenerative Meniscal Tear. *N. Engl. J. Med.*  
28  
29 471 2013;369(26):2515–24.  
30  
31 472 49. Vermesan D, Prejbeanu R, Laitin S, Damian G, Deleanu B, Abbinante A, et al. Arthroscopic debridement  
32  
33 473 compared to intra-articular steroids in treating degenerative medial meniscal tears. *Eur. Rev. Med.*  
34  
35 474 *Pharmacol. Sci.* 2013;17(23):3192–6.  
36  
37 475 50. Yim JH, Seon JK, Song EK, Choi JI, Kim MC, Lee KB, et al. A comparative study of meniscectomy and  
38  
39 476 nonoperative treatment for degenerative horizontal tears of the medial meniscus. *Am. J. Sports Med.*  
40  
41 477 2013;41(7):1565–70.  
42  
43 478 51. Graaf VA van de, Noorduyn JCA, Willigenburg NW, Butter IK, Gast A de, Mol BW, et al. Effect of Early  
44  
45 479 Surgery vs Physical Therapy on Knee Function Among Patients With Nonobstructive Meniscal Tears:  
46  
47 480 The ESCAPE Randomized Clinical Trial. *Jama.* 2018;320(13):1328–37.  
48  
49 481 52. Roos EM, Hare KB, Nielsen SM, Christensen R, Lohmander LS. Better outcome from arthroscopic partial  
50  
51 482 meniscectomy than skin incisions only? A sham-controlled randomised trial in patients aged 35-55  
52  
53 483 years with knee pain and an MRI-verified meniscal tear. *BMJ Open.* 2018;8(2):e019461.  
54  
55 484 53. Gauffin H, Tagesson S, Meunier A, Magnusson H, Kvist J. Knee arthroscopic surgery is beneficial to  
56  
57 485 middle-aged patients with meniscal symptoms: A prospective, randomised, single-blinded study.  
58  
59 486 *Osteoarthr. Cartil.* 2014;22(11):1808–16.

- 1  
2  
3 487 54. Hellerman C. You may not be better off after knee surgery [Internet]. CNN. 2013 [cited 2018 Oct 31].  
4  
5 488 Available from: <https://edition.cnn.com/2013/12/26/health/knee-surgery-study/index.html>  
6  
7 489 55. Wilkinson MD, Dumontier M, Aalbersberg IJ, Appleton G, Axton M, Baak A, et al. The FAIR Guiding  
8  
9 490 Principles for scientific data management and stewardship. *Sci. Data*. 2016;3:160018.  
10  
11 491 56. Debray T, Jolani S, Schierenberg A, Moons K. Dealing with missing data in an individual participant data  
12  
13 492 meta-analysis: one--stage versus two--stage methods | Colloquium Abstracts. *Abstr. 24th Cochrane*  
14  
15 493 *Colloq.* 2016;23-27 Oct.  
16  
17 494 57. Friberger Pajalic K, Turkiewicz A, Englund M. Update on the risks of complications after knee  
18  
19 495 arthroscopy. *BMC Musculoskelet. Disord.* 2018;19(1):179.

21  
22 496 **Additional files:**

23  
24 497 File name: Additional file 1

25  
26 498 File format: Additional\_file\_1.doc

27  
28 499 Title: Systematic search of literature to detect randomized controlled trials that compared (partial) arthroscopic  
29  
30 500 meniscectomy to sham surgery or non-surgical techniques.

31  
32 501 Description: The systematic search strategy in Medline (PubMed), Embase, CENTRAL, CINAHL, Web of Science  
33  
34 502 and WHO trial register to detect randomized controlled trials that compared (partial) arthroscopic  
35  
36 503 meniscectomy to sham surgery or non-surgical techniques.

37  
38  
39 504

40  
41 505 File name: Additional file 2

42  
43 506 File format: Additional\_file\_2.doc

44  
45 507 Title: Potential clinically relevant baseline characteristics

46  
47 508 Description: A list of all identified potential clinically relevant baseline characteristics divided into 5 categories:

48  
49 509 General characteristics, patient history, meniscus information, symptoms and quality of life.  
50  
51  
52  
53  
54  
55  
56  
57  
58  
59  
60

**Additional file 1: Systematic search of literature to detect randomized controlled trials that compared (partial) arthroscopic meniscectomy to sham surgery or non-surgical techniques.**

|    | <b>Medline (Pubmed)</b>                         | <b>Embase</b>                                    | <b>Cochrane Database of registered trial (CENTRAL)</b>                                                    | <b>Cumulative Index to Nursing and Allied Health Literature (CINAHL)</b>                                    | <b>Web of Science (Thomson Reuter)</b> | <b>WHO trial register</b>     |
|----|-------------------------------------------------|--------------------------------------------------|-----------------------------------------------------------------------------------------------------------|-------------------------------------------------------------------------------------------------------------|----------------------------------------|-------------------------------|
| 1  | "Menisci, Tibial/surgery"[Mesh]                 | Arthroscopic meniscectomy.ti,ab,kw.              | MeSH descriptor: [Menisci, Tibial] explode all trees and with qualifier(s): [Injuries – IN, Surgery – SU] | TI "Degenerative meniscal tear" OR AB "Degenerative meniscal tear"                                          | arthroscopy AND knee                   | "Menisc*" in the title        |
| 2  | "Menisci, Tibial/injuries"[Mesh]                | Arthroscopic debridement.ti,ab,kw.               | MeSH descriptor: [Arthroscopy] explode all trees                                                          | MH "Arthroscopy" OR "arthroscopy"                                                                           | arthroscopic meniscectomy              | "Menisc*" in the condition    |
| 3  | "Degenerative meniscal tear"[TIAB]              | Arthroscopic lavage.ti,ab,kw.                    | MeSH descriptor: [Knee] explode all trees                                                                 | MH "knee" OR AB "knee" OR TI "knee"                                                                         | arthroscopic debridement               | "Menisc*" in the intervention |
| 4  | "Arthroscopic lavage"[TIAB]                     | Degenerative meniscal tear.ti,ab,kw.             | 2 and 3                                                                                                   | 2 AND 3                                                                                                     | arthroscopic lavage                    | 1 OR 2 OR 3                   |
| 5  | "Arthroscopic debridement"[TIAB]                | knee meniscus/ or meniscus tibial.mp             | Degenerative meniscal tear:ti,ab,kw (Word variations have been searched)                                  | MH "Meniscal Injuries" OR AB "meniscal Injuries" OR TI "meniscal Injuries"                                  | degenerative meniscal tear             |                               |
| 6  | "arthroscopic meniscectomy"[TIAB]               | exp knee arthroscopy/                            | Arthroscopic lavage:ti,ab,kw (Word variations have been searched)                                         | MH "Menisci, Tibial" OR AB "tibial meniscus" OR TI "tibial meniscus"                                        | menisci, tibial AND surgery            |                               |
| 7  | "Arthroscopy"[TIAB] AND "Knee"[TIAB]            | 1 or 2 or 3 or 4 or 5 or 6                       | Arthroscopic debridement:ti,ab,kw (Word variations have been searched)                                    | TI "Arthroscopic lavage" OR AB "Arthroscopic lavage"                                                        | menisci, tibial AND injury             |                               |
| 8  | 1 OR 2 OR 3 OR 4 OR 5 OR 6 OR 7                 | randomized controlled trial/                     | arthroscopic meniscectomy:ti,ab,kw (Word variations have been searched)                                   | TI "Arthroscopic debridement" OR AB "Arthroscopic debridement"                                              | 1 OR 2 OR 3 OR 4 OR 5 OR 6 OR 7        |                               |
| 9  | "Randomized" [TIAB]                             | randomized.ti,ab,kw.                             | 1 or 4 or 5 or 6 or 7 or 8                                                                                | TI "arthroscopic meniscectomy" OR AB "arthroscopic meniscectomy"                                            | randomized                             |                               |
| 10 | "Randomized controlled trial"[Publication Type] | randomized.ti,ab,kw.                             |                                                                                                           | 1 OR 4 OR 5 OR 6 OR 7 OR 8 OR 9                                                                             | randomised                             |                               |
| 11 | "randomized controlled trials as topic"[Mesh]   | random allocation.mp.                            |                                                                                                           | TI "Randomized" OR AB "Randomized"                                                                          | random allocation                      |                               |
| 12 | "Random allocation"[Mesh]                       | randomized.mp.                                   |                                                                                                           | MH "Randomized Controlled Trials" OR TI "Randomized Controlled Trials" OR AB "Randomized Controlled Trials" | control group                          |                               |
| 13 | "Control group"[TIAB]                           | "randomized controlled trial (topic)"/           |                                                                                                           | MH "Random Assignment" OR AB "Random Assignment" OR TI "Random Assignment"                                  | cross-over stud*                       |                               |
| 14 | "Control groups"[Mesh]                          | control group.mp.                                |                                                                                                           | AB "Random Allocation" OR TI "Random Allocation"                                                            | randomized controlled trial            |                               |
| 15 | "Cross-over studies"[TIAB]                      | control group/                                   |                                                                                                           | (MH "Control Group") OR (AB "Control Group") OR (TI "Control Group")                                        | 9 OR 10 OR 11 OR 12 OR 13 OR 14        |                               |
| 16 | "Cross-over study"[TIAB]                        | crossover procedure/                             |                                                                                                           | (MH "Crossover Design") AND (AB "Crossover Design") AND (TI "Crossover Design")                             | 8 AND 15                               |                               |
| 17 | 9 OR 10 OR 11 OR 12 OR 13 OR 14 OR 15 OR 16     | 8 or 9 or 10 or 11 or 12 or 13 or 14 or 15 or 16 |                                                                                                           | 11 OR 12 OR 13 OR 14 OR 15 OR 16                                                                            |                                        |                               |
| 18 | 8 AND 17                                        | 7 and 17                                         |                                                                                                           | 10 AND 17                                                                                                   |                                        |                               |

## Additional file 2. Potential clinically relevant baseline characteristics

| Category                | Characteristics                                              |
|-------------------------|--------------------------------------------------------------|
| General characteristics | Age                                                          |
|                         | Gender                                                       |
|                         | Weight, height (BMI)                                         |
| Patient history         | History of medication for knee symptoms                      |
|                         | History of serious knee injury                               |
|                         | History of knee surgery                                      |
|                         | Family history of knee OA / of knee replacement surgery      |
|                         | History of osteoarthritis                                    |
| Meniscus information    | Medial/lateral meniscus                                      |
|                         | Radiographic severity of knee OA                             |
|                         | MRI meniscus extrusion                                       |
|                         | MRI meniscus tear type / degeneration                        |
|                         | Onset of symptoms (e.g. gradual, after event, suddenly)      |
|                         | Duration of symptoms                                         |
|                         | Grading of work and sporting activities                      |
| Symptoms                | Signs and symptoms during specific physical examination test |
|                         | Knee locking symptoms / mechanical symptoms                  |
|                         | Knee related daily function                                  |
|                         | Knee pain                                                    |
|                         | Knee stiffness                                               |
|                         | Knee related quality of life                                 |
|                         | Knee swelling                                                |
| Quality of life         | Generic quality of life (EQ-5D / SF36)                       |
|                         | Mental health score                                          |



## PRISMA-P 2015 Checklist

This checklist has been adapted for use with systematic review protocol submissions to BioMed Central journals from Table 3 in Moher D et al: Preferred reporting items for systematic review and meta-analysis protocols (PRISMA-P) 2015 statement. *Systematic Reviews* 2015 4:1

An Editorial from the Editors-in-Chief of *Systematic Reviews* details why this checklist was adapted - Moher D, Stewart L & Shekelle P: Implementing PRISMA-P: recommendations for prospective authors. *Systematic Reviews* 2016 5:15

| Section/topic                     | #  | Checklist item                                                                                                                                                                                  | Information reported                |                                     | Line number(s) |
|-----------------------------------|----|-------------------------------------------------------------------------------------------------------------------------------------------------------------------------------------------------|-------------------------------------|-------------------------------------|----------------|
|                                   |    |                                                                                                                                                                                                 | Yes                                 | No                                  |                |
| <b>ADMINISTRATIVE INFORMATION</b> |    |                                                                                                                                                                                                 |                                     |                                     |                |
| <b>Title</b>                      |    |                                                                                                                                                                                                 |                                     |                                     |                |
| Identification                    | 1a | Identify the report as a protocol of a systematic review                                                                                                                                        | <input checked="" type="checkbox"/> | <input type="checkbox"/>            | 1-2            |
| Update                            | 1b | If the protocol is for an update of a previous systematic review, identify as such                                                                                                              | <input type="checkbox"/>            | <input type="checkbox"/>            | NA             |
| <b>Registration</b>               | 2  | If registered, provide the name of the registry (e.g., PROSPERO) and registration number in the Abstract                                                                                        | <input checked="" type="checkbox"/> | <input type="checkbox"/>            | 64, 109        |
| <b>Authors</b>                    |    |                                                                                                                                                                                                 |                                     |                                     |                |
| Contact                           | 3a | Provide name, institutional affiliation, and e-mail address of all protocol authors; provide physical mailing address of corresponding author                                                   | <input checked="" type="checkbox"/> | <input type="checkbox"/>            | 6 - 36         |
| Contributions                     | 3b | Describe contributions of protocol authors and identify the guarantor of the review                                                                                                             | <input checked="" type="checkbox"/> | <input type="checkbox"/>            | 347 - 350      |
| <b>Amendments</b>                 | 4  | If the protocol represents an amendment of a previously completed or published protocol, identify as such and list changes; otherwise, state plan for documenting important protocol amendments | <input type="checkbox"/>            | <input type="checkbox"/>            | NA             |
| <b>Support</b>                    |    |                                                                                                                                                                                                 |                                     |                                     |                |
| Sources                           | 5a | Indicate sources of financial or other support for the review                                                                                                                                   | <input checked="" type="checkbox"/> | <input type="checkbox"/>            | 344-346        |
| Sponsor                           | 5b | Provide name for the review funder and/or sponsor                                                                                                                                               | <input checked="" type="checkbox"/> | <input type="checkbox"/>            | 344-346        |
| Role of sponsor/funder            | 5c | Describe roles of funder(s), sponsor(s), and/or institution(s), if any, in developing the protocol                                                                                              | <input type="checkbox"/>            | <input checked="" type="checkbox"/> |                |
| <b>INTRODUCTION</b>               |    |                                                                                                                                                                                                 |                                     |                                     |                |
| <b>Rationale</b>                  | 6  | Describe the rationale for the review in the context of what is already known                                                                                                                   | <input checked="" type="checkbox"/> | <input type="checkbox"/>            | 79-102         |

| Section/topic                             | #   | Checklist item                                                                                                                                                                                                                              | Information reported                |                                     | Line number(s)              |
|-------------------------------------------|-----|---------------------------------------------------------------------------------------------------------------------------------------------------------------------------------------------------------------------------------------------|-------------------------------------|-------------------------------------|-----------------------------|
|                                           |     |                                                                                                                                                                                                                                             | Yes                                 | No                                  |                             |
| <b>Objectives</b>                         | 7   | Provide an explicit statement of the question(s) the review will address with reference to participants, interventions, comparators, and outcomes (PICO)                                                                                    | <input checked="" type="checkbox"/> | <input type="checkbox"/>            | 103-104                     |
| <b>METHODS</b>                            |     |                                                                                                                                                                                                                                             |                                     |                                     |                             |
| <b>Eligibility criteria</b>               | 8   | Specify the study characteristics (e.g., PICO, study design, setting, time frame) and report characteristics (e.g., years considered, language, publication status) to be used as criteria for eligibility for the review                   | <input checked="" type="checkbox"/> | <input type="checkbox"/>            | 119-1128                    |
| <b>Information sources</b>                | 9   | Describe all intended information sources (e.g., electronic databases, contact with study authors, trial registers, or other grey literature sources) with planned dates of coverage                                                        | <input checked="" type="checkbox"/> | <input type="checkbox"/>            | 129-1144                    |
| <b>Search strategy</b>                    | 10  | Present draft of search strategy to be used for at least one electronic database, including planned limits, such that it could be repeated                                                                                                  | <input checked="" type="checkbox"/> | <input type="checkbox"/>            | Additional file 1           |
| <b>STUDY RECORDS</b>                      |     |                                                                                                                                                                                                                                             |                                     |                                     |                             |
| Data management                           | 11a | Describe the mechanism(s) that will be used to manage records and data throughout the review                                                                                                                                                | <input checked="" type="checkbox"/> | <input type="checkbox"/>            | 145-157                     |
| Selection process                         | 11b | State the process that will be used for selecting studies (e.g., two independent reviewers) through each phase of the review (i.e., screening, eligibility, and inclusion in meta-analysis)                                                 | <input checked="" type="checkbox"/> | <input type="checkbox"/>            | 130-144                     |
| Data collection process                   | 11c | Describe planned method of extracting data from reports (e.g., piloting forms, done independently, in duplicate), any processes for obtaining and confirming data from investigators                                                        | <input checked="" type="checkbox"/> | <input type="checkbox"/>            | 130-144                     |
| <b>Data items</b>                         | 12  | List and define all variables for which data will be sought (e.g., PICO items, funding sources), any pre-planned data assumptions and simplifications                                                                                       | <input checked="" type="checkbox"/> | <input type="checkbox"/>            | 159-170 + Additional file 2 |
| <b>Outcomes and prioritization</b>        | 13  | List and define all outcomes for which data will be sought, including prioritization of main and additional outcomes, with rationale                                                                                                        | <input checked="" type="checkbox"/> | <input type="checkbox"/>            | 159-170 + Additional file 2 |
| <b>Risk of bias in individual studies</b> | 14  | Describe anticipated methods for assessing risk of bias of individual studies, including whether this will be done at the outcome or study level, or both; state how this information will be used in data synthesis                        | <input checked="" type="checkbox"/> | <input type="checkbox"/>            | 159-185                     |
| <b>DATA</b>                               |     |                                                                                                                                                                                                                                             |                                     |                                     |                             |
| <b>Synthesis</b>                          | 15a | Describe criteria under which study data will be quantitatively synthesized                                                                                                                                                                 | <input type="checkbox"/>            | <input checked="" type="checkbox"/> |                             |
|                                           | 15b | If data are appropriate for quantitative synthesis, describe planned summary measures, methods of handling data, and methods of combining data from studies, including any planned exploration of consistency (e.g., $I^2$ , Kendall's tau) | <input checked="" type="checkbox"/> | <input type="checkbox"/>            | 219-261                     |

| Section/topic                            | #   | Checklist item                                                                                                              | Information reported                |                                     | Line number(s) |
|------------------------------------------|-----|-----------------------------------------------------------------------------------------------------------------------------|-------------------------------------|-------------------------------------|----------------|
|                                          |     |                                                                                                                             | Yes                                 | No                                  |                |
|                                          | 15c | Describe any proposed additional analyses (e.g., sensitivity or subgroup analyses, meta-regression)                         | <input checked="" type="checkbox"/> | <input type="checkbox"/>            | 262-270        |
|                                          | 15d | If quantitative synthesis is not appropriate, describe the type of summary planned                                          | <input type="checkbox"/>            | <input checked="" type="checkbox"/> |                |
| <b>Meta-bias(es)</b>                     | 16  | Specify any planned assessment of meta-bias(es) (e.g., publication bias across studies, selective reporting within studies) | <input checked="" type="checkbox"/> | <input type="checkbox"/>            | 178-185        |
| <b>Confidence in cumulative evidence</b> | 17  | Describe how the strength of the body of evidence will be assessed (e.g., GRADE)                                            | <input type="checkbox"/>            | <input checked="" type="checkbox"/> |                |
