# Supplementary material for: Arthroscopic meniscectomy versus non-surgical or sham treatment in patients with MRI confirmed degenerative meniscus lesions: a protocol for an individual participant data meta-analysis
Source: PubMed Central journal article supplement — BMJ Open. 2020 Mar 8;10(3):e031864. doi: 10.1136/bmjopen-2019-031864 (PMC7064080; doi:10.1136/bmjopen-2019-031864), 2020-03-08
Supplement: bmjopen-2019-031864supp001.pdf [file bmjopen-2019-031864supp001.pdf]

## Additional file 1: Systematic search of literature to detect randomized controlled trials that compared (partial) arthroscopic meniscectomy to sham surgery or non-surgical techniques.

|    | Medline (Pubmed)                                | Embase                                           | Cochrane Database of registered trial (CENTRAL)                                                           | Cumulative Index to Nursing and Allied Health Literature (CINAHL)                                           | Web of Science (Thomson Reuter) | WHO trial register            |
|----|-------------------------------------------------|--------------------------------------------------|-----------------------------------------------------------------------------------------------------------|-------------------------------------------------------------------------------------------------------------|---------------------------------|-------------------------------|
| 1  | "Menisci, Tibial/surgery"[Mesh]                 | Arthroscopic meniscectomy.ti,ab,kw.              | MeSH descriptor: [Menisci, Tibial] explode all trees and with qualifier(s): [Injuries – IN, Surgery – SU] | TI "Degenerative meniscal tear" OR AB "Degenerative meniscal tear"                                          | arthroscopy AND knee            | "Menisc*" in the title        |
| 2  | "Menisci, Tibial/injuries"[Mesh]                | Arthroscopic debridement.ti,ab,kw.               | MeSH descriptor: [Arthroscopy] explode all trees                                                          | MH "Arthroscopy" OR "arthroscopy"                                                                           | arthroscopic meniscectomy       | "Menisc*" in the condition    |
| 3  | "Degenerative meniscal tear" [TIAB]             | Arthroscopic lavage.ti,ab,kw.                    | MeSH descriptor: [Knee] explode all trees                                                                 | MH "knee" OR AB "knee" OR TI "knee"                                                                         | arthroscopic debridement        | "Menisc*" in the intervention |
| 4  | "Arthroscopic lavage"[TIAB]                     | Degenerative meniscal tear.ti,ab,kw.             | 2 and 3                                                                                                   | 2 AND 3                                                                                                     | arthroscopic lavage             | 1 OR 2 OR 3                   |
| 5  | "Arthroscopic debridement"[TIAB]                | knee meniscus/ or meniscus tibial.mp             | Degenerative meniscal tear:ti,ab,kw (Word variations have been searched)                                  | MH "Meniscal Injuries" OR AB "meniscal Injuries" OR TI "meniscal Injuries"                                  | degenerative meniscal tear      |                               |
| 6  | "arthroscopic meniscectomy"[TIAB]               | exp knee arthroscopy/                            | Arthroscopic lavage:ti,ab,kw (Word variations have been searched)                                         | MH "Menisci, Tibial" OR AB "tibial meniscus" OR TI "tibial meniscus"                                        | menisci, tibial AND surgery     |                               |
| 7  | "Arthroscopy"[TIAB] AND "Knee"[TIAB]            | 1 or 2 or 3 or 4 or 5 or 6                       | Arthroscopic debridement:ti,ab,kw (Word variations have been searched)                                    | TI "Arthroscopic lavage" OR AB "Arthroscopic lavage"                                                        | menisci, tibial AND injury      |                               |
| 8  | 1 OR 2 OR 3 OR 4 OR 5 OR 6 OR 7                 | randomized controlled trial/                     | arthroscopic meniscectomy:ti,ab,kw (Word variations have been searched)                                   | TI "Arthroscopic debridement" OR AB "Arthroscopic debridement"                                              | 1 OR 2 OR 3 OR 4 OR 5 OR 6 OR 7 |                               |
| 9  | "Randomized" [TIAB]                             | randomized.ti,ab,kw.                             | 1 or 4 or 5 or 6 or 7 or 8                                                                                | TI "arthroscopic meniscectomy" OR AB "arthroscopic meniscectomy"                                            | randomized                      |                               |
| 10 | "Randomized controlled trial"[Publication Type] | randomized.ti,ab,kw.                             |                                                                                                           | 1 OR 4 OR 5 OR 6 OR 7 OR 8 OR 9                                                                             | randomised                      |                               |
| 11 | "randomized controlled trials as topic"[Mesh]   | random allocation.mp.                            |                                                                                                           | TI "Randomized" OR AB "Randomized"                                                                          | random allocation               |                               |
| 12 | "Random allocation"[Mesh]                       | randomized.mp.                                   |                                                                                                           | MH "Randomized Controlled Trials" OR TI "Randomized Controlled Trials" OR AB "Randomized Controlled Trials" | control group                   |                               |
| 13 | "Control group"[TIAB]                           | "randomized controlled trial (topic)"/           |                                                                                                           | MH "Random Assignment" OR AB "Random Assignment" OR TI "Random Assignment"                                  | cross-over stud*                |                               |
| 14 | "Control groups"[Mesh]                          | control group.mp.                                |                                                                                                           | AB "Random Allocation" OR TI "Random Allocation"                                                            | randomized controlled trial     |                               |
| 15 | "Cross-over studies"[TIAB]                      | control group/                                   |                                                                                                           | (MH "Control Group") OR (AB "Control Group") OR (TI "Control Group")                                        | 9 OR 10 OR 11 OR 12 OR 13 OR 14 |                               |
| 16 | "Cross-over study"[TIAB]                        | crossover procedure/                             |                                                                                                           | (MH "Crossover Design") AND (AB "Crossover Design") AND (TI "Crossover Design")                             | 8 AND 15                        |                               |
| 17 | 9 OR 10 OR 11 OR 12 OR 13 OR 14 OR 15 OR 16     | 8 or 9 or 10 or 11 or 12 or 13 or 14 or 15 or 16 |                                                                                                           | 11 OR 12 OR 13 OR 14 OR 15 OR 16                                                                            |                                 |                               |
| 18 | 8 AND 17                                        | 7 and 17                                         |                                                                                                           | 10 AND 17                                                                                                   |                                 |                               |
