# Supplementary material for: Arthroscopic meniscectomy versus non-surgical or sham treatment in patients with MRI confirmed degenerative meniscus lesions: a protocol for an individual participant data meta-analysis
Source: PubMed Central journal article supplement — BMJ Open. 2020 Mar 8;10(3):e031864. doi: 10.1136/bmjopen-2019-031864 (PMC7064080; doi:10.1136/bmjopen-2019-031864), 2020-03-08
Supplement: bmjopen-2019-031864supp002.pdf [file bmjopen-2019-031864supp002.pdf]

**Additional file 2. Potential clinically relevant baseline characteristics**

| <b>Category</b>         | <b>Characteristics</b>                                       |
|-------------------------|--------------------------------------------------------------|
| General characteristics |                                                              |
|                         | Age                                                          |
|                         | Gender                                                       |
|                         | Weight, height (BMI)                                         |
| Patient history         |                                                              |
|                         | History of medication for knee symptoms                      |
|                         | History of serious knee injury                               |
|                         | History of knee surgery                                      |
|                         | Family history of knee OA / of knee replacement surgery      |
|                         | History of osteoarthritis                                    |
| Meniscus information    |                                                              |
|                         | Medial/lateral meniscus                                      |
|                         | Radiographic severity of knee OA                             |
|                         | MRI meniscus extrusion                                       |
|                         | MRI meniscus tear type / degeneration                        |
|                         | Onset of symptoms (e.g. gradual, after event, suddenly)      |
|                         | Duration of symptoms                                         |
|                         | Grading of work and sporting activities                      |
| Symptoms                |                                                              |
|                         | Signs and symptoms during specific physical examination test |
|                         | Knee locking symptoms / mechanical symptoms                  |
|                         | Knee related daily function                                  |
|                         | Knee pain                                                    |
|                         | Knee stiffness                                               |
|                         | Knee related quality of life                                 |
|                         | Knee swelling                                                |
| Quality of life         |                                                              |
|                         | Generic quality of life (EQ-5D / SF36)                       |
|                         | Mental health score                                          |
